# Supplementary material
Source: PubMed Central journal article supplement (PMC3096486)

Supporting Information for:

**Mechanistic and Computational Studies of Oxidatively Induced Aryl–CF<sub>3</sub> Bond-Formation  
at Pd: Rational Design of Room Temperature Aryl Trifluoromethylation**

*Nicholas D. Ball, J. Brannon Gary, Yingda Ye, Melanie S. Sanford\**

*Department of Chemistry, University of Michigan, 930 N. University Avenue, Ann Arbor, Michigan 48109*

## Table of Contents

|                                                                                                                                                                                         |     |
|-----------------------------------------------------------------------------------------------------------------------------------------------------------------------------------------|-----|
| General Procedures.....                                                                                                                                                                 | S4  |
| Materials and Methods.....                                                                                                                                                              | S4  |
| Experimental Details.....                                                                                                                                                               | S5  |
| General procedure for the synthesis of (dtbpy)Pd(Aryl)(I).....                                                                                                                          | S5  |
| General procedure for the synthesis of (tmeda)Pd(Aryl)(I).....                                                                                                                          | S6  |
| General procedure for the synthesis of (dtbpy)Pd(Aryl)(CF <sub>3</sub> ).....                                                                                                           | S8  |
| General procedure for the synthesis of (tmeda)Pd(Aryl)(CF <sub>3</sub> ) , <b>11</b> .....                                                                                              | S11 |
| Synthesis of (dtbpy)Pd <sup>IV</sup> (4-CH <sub>3</sub> C <sub>6</sub> H <sub>5</sub> )(CF <sub>3</sub> )(F)(OTf), <b>5</b> .....                                                       | S14 |
| Synthesis of (dtbpy)Pd <sup>IV</sup> (4-CF <sub>3</sub> C <sub>6</sub> H <sub>5</sub> )(CF <sub>3</sub> )(F)(OTf), <b>6</b> .....                                                       | S14 |
| Procedure for the synthesis of (tmeda)Pd( <i>p</i> -CF <sub>3</sub> Ph)(CF <sub>3</sub> ) ( <b>11b</b> ) from (tmeda)Pd( <i>p</i> -CF <sub>3</sub> Ph)(TFA).....                        | S16 |
| Procedure for the synthesis of (tmeda)Pd( <i>p</i> -CF <sub>3</sub> Ph)(CF <sub>3</sub> ) ( <b>11b</b> ) from (tmeda)Pd( <i>p</i> -CF <sub>3</sub> Ph)(OAc). ....                       | S16 |
| General procedure for oxidatively induced Aryl–CF <sub>3</sub> coupling from <b>1a-1i</b> , (dtbpy)Pd( <i>o</i> -tol)(CF <sub>3</sub> ), <b>9</b> , <b>10</b> and <b>11a-11i</b> . .... | S16 |
| Procedure to determine rate of reductive elimination from Pd <sup>IV</sup> complex <b>4</b> .....                                                                                       | S17 |
| <b>Figure S1</b> . ....                                                                                                                                                                 | S17 |
| <b>Figure S2</b> . ....                                                                                                                                                                 | S18 |
| <b>Table S1</b> . ....                                                                                                                                                                  | S18 |
| Determining Order in Triflate with <b>4</b> at 50 °C in NO <sub>2</sub> Ph- <i>d</i> <sub>5</sub> .....                                                                                 | S19 |
| <b>Table S2</b> . ....                                                                                                                                                                  | S19 |
| <b>Figure S3</b> . ....                                                                                                                                                                 | S20 |
| Activation Parameters for Reductive Elimination from <b>4</b> .....                                                                                                                     | S20 |
| <b>Table S3</b> . ....                                                                                                                                                                  | S20 |
| <b>Figure S4</b> . ....                                                                                                                                                                 | S21 |
| <b>Figure S5</b> . ....                                                                                                                                                                 | S21 |
| Determining Initial Rates of Reductive Elimination from Complexes <b>5</b> and <b>6</b> at 50 °C in NO <sub>2</sub> Ph- <i>d</i> <sub>5</sub> .....                                     | S21 |
| <b>Table S4</b> . ....                                                                                                                                                                  | S22 |
| <b>Figure S6</b> . ....                                                                                                                                                                 | S22 |
| <b>Figure S7</b> . ....                                                                                                                                                                 | S22 |
| Computational Methods.....                                                                                                                                                              | S23 |
| <b>Table S5</b> . ....                                                                                                                                                                  | S24 |
| <b>Table S6</b> . ....                                                                                                                                                                  | S24 |
| <b>Table S7</b> . ....                                                                                                                                                                  | S24 |
| <b>Figure S8</b> . ....                                                                                                                                                                 | S25 |
| <b>Figure S9</b> . ....                                                                                                                                                                 | S25 |
| <b>Figure S10</b> . ....                                                                                                                                                                | S26 |

|                                                  |     |
|--------------------------------------------------|-----|
| Calculations – Optimized Atomic Coordinates..... | S27 |
| References.....                                  | S43 |
| NMR Spectra.....                                 | S44 |

## General Procedures

NMR spectra were obtained on a Varian Inova 400 (399.96 MHz for  $^1\text{H}$ ; 376.34 MHz for  $^{19}\text{F}$ ; 100.57 MHz for  $^{13}\text{C}$ ), a vnmr500 (500.09 MHz for  $^1\text{H}$ ; 470.56 MHz for  $^{19}\text{F}$ ; 125.75 MHz for  $^{13}\text{C}$ ) spectrometer, or an MR400 (400.53 MHz for  $^1\text{H}$ ; 376.87 MHz for  $^{19}\text{F}$ ; 100.71 MHz for  $^{13}\text{C}$ ) spectrometer.  $^1\text{H}$ ,  $^{19}\text{F}$  and  $^{13}\text{C}$  chemical shifts are reported in parts per million (ppm) relative to TMS, with the residual solvent peak used as an internal reference.  $\text{CDCl}_3$  was referenced to  $-77.00$  ppm in  $^{13}\text{C}$  and  $7.26$  ppm in  $^1\text{H}$  NMR spectra.  $^{19}\text{F}$  NMR spectra are referenced on a unified scale, where the single primary reference is the frequency of the residual solvent peak in the  $^1\text{H}$  NMR spectrum.<sup>1</sup>  $^1\text{H}$  and  $^{19}\text{F}$  multiplicities are reported as follows: singlet (s), doublet (d), doublet of doublets (dd), quartet (q), multiplet (m), and broad resonance (br). Elemental analyses were conducted by Atlantic Microlabs in Norcross, Georgia. Mass spectral data were obtained on a Micromass magnetic sector mass spectrometer or on a Micromass LCT mass spectrometer with an electrospray ionization mode.

## Materials and Methods

The palladium(II) complexes  $\text{Pd}(\text{dba})_2$  [dba = dibenzylideneacetone],<sup>2</sup>  $(\text{dtbpy})\text{PdCl}_2$  [dtbpy = 4,4'-di-*tert*-butyl-2,2'-bipyridyl],<sup>3</sup>  $(\text{dtbpy})\text{PdI}_2$ ,<sup>4</sup>  $(\text{bpy})\text{Pd}(\text{Ph})(\text{I})$  [bpy = 2,2'-bipyridyl],<sup>5</sup>  $(\text{dtbpy})\text{Pd}(\text{Aryl})(\text{CF}_3)$  (Aryl = *p*- $\text{FC}_6\text{H}_4$ , *p*- $\text{CF}_3\text{C}_6\text{H}_4$  and *p*- $\text{MeOC}_6\text{H}_4$ ),<sup>6</sup>  $(\text{teeda})\text{Pd}(\text{Ph})(\text{I})$  [teeda = *N,N,N',N'*-tetraethylethylenediamine],<sup>7</sup>  $(\text{dpe})\text{Pd}(\text{Ph})(\text{I})$  [dpe = 1,2-dipiperidinoethane],<sup>7</sup>  $(\text{tmeda})\text{Pd}(\text{p-FC}_6\text{H}_4)(\text{CF}_3)$ <sup>6</sup> and  $(\text{tmeda})\text{Pd}(\text{Ph})(\text{CF}_3)$ <sup>6</sup> were prepared according to literature procedures.  $(\text{dtbpy})\text{Pd}^{\text{IV}}(\text{p-FC}_6\text{H}_4)(\text{F})(\text{CF}_3)(\text{OTf})$  was prepared according to the literature.<sup>6</sup> All aryl iodides were purchased from commercial sources. Authentic samples of all of the aryl- $\text{CF}_3$  reductive elimination products were purchased from commercial sources. Rupert's reagent ( $\text{TMSCF}_3$ ) and 1-fluoro-4-benzotrifluoride were obtained from Matrix Chemicals. The ligands tmeda, teeda, and dtbpy were obtained from Aldrich, while 1,2-bispiperidinoethane was synthesized according to a literature procedure.<sup>8</sup> 1-Fluoro-2,4,6-trimethylpyridinium triflate was obtained from TCI America. Unless otherwise noted, all reagents were used as received. Nitrobenzene- $d_5$ ,  $\text{CD}_2\text{Cl}_2$ ,  $\text{CD}_3\text{CN}$  and  $\text{CDCl}_3$  were obtained from Cambridge Isotope Laboratories. All other solvents were obtained from Fisher Chemicals. Tetrahydrofuran, toluene and pentane were purified using an Innovative Technologies (IT) solvent purification system consisting of a copper catalyst, activated alumina, and molecular sieves. Dichloroethane was distilled from  $\text{CaH}_2$ . Nitrobenzene- $d_5$  was distilled from  $\text{P}_2\text{O}_5$  and then stored over 4 Å molecular sieves. All syntheses were conducted using standard Schlenk techniques or in an inert atmosphere glovebox unless otherwise stated.



## Experimental Details

**General procedure for the synthesis of (dtbpy)Pd(Aryl)(I):** Under nitrogen, Pd(dba)<sub>2</sub> (3.0 g, 5.23 mmol, 1 equiv) was weighed into a 250 mL round bottom flask and dissolved in THF (50 mL). The ligand dtbpy (3.7 g, 13.6 mmol, 2.6 equiv) was added, and the resulting mixture was stirred at 25 °C for 15 min. The aryl iodide (14.6 mmol, 2.8 equiv) was added, and the reaction was heated for 60 °C for 3 h. In air, the reaction mixture was filtered through a plug of Celite, and the solvent was removed under reduced pressure. The resulting solid was washed with hexanes (3 x 20 mL), 50:50 (v:v) mixture hexanes/diethyl ether (6 x 20 mL) and then diethyl ether (3 x 5 mL) to remove all residual dibenzylidene acetone (dba). The product was then dried *in vacuo*.

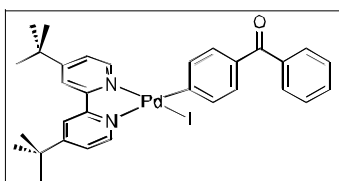

The product (dtbpy)Pd(*p*-PhC(O)C<sub>6</sub>H<sub>4</sub>)(I) was isolated as an orange solid (2.20 g, 62% yield). <sup>1</sup>H NMR (CDCl<sub>3</sub>): δ 9.45 (d, *J* = 6 Hz, 1H), 7.97 (app. s, 2H), 7.80-7.78 (multiple peaks, 2H), 7.58 (d, *J* = 8 Hz, 2H), 7.53-7.42 (multiple peaks, 7H), 7.30 (dd, *J* = 6 Hz, 2H, 1H), 1.40 (s, 9H), 1.35 (s, 9H). <sup>13</sup>C NMR (CDCl<sub>3</sub>): δ 197.68, 169.15, 163.78, 163.66, 155.39, 154.39, 151.72, 150.44, 138.74, 135.98, 132.62, 131.50, 129.91, 128.12, 127.96, 123.60, 123.38, 118.21, 118.08, 35.43(2 overlapping carbons), 30.31, 30.28. HRMS electrospray (*m/z*): [M – I + MeCN]<sup>+</sup> calcd for C<sub>33</sub>H<sub>36</sub>N<sub>3</sub>OPd, 596.1880; Found, 596.1900. Notably, small amounts (~5%) of (dtbpy)Pd(I)<sub>2</sub> were observed in the <sup>1</sup>H and <sup>13</sup>C NMR spectra of most isolated samples of (dtbpy)Pd(*p*-Ph C(O)C<sub>6</sub>H<sub>4</sub>)(I).

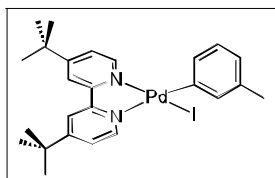

The product (dtbpy)Pd(*m*-CH<sub>3</sub>C<sub>6</sub>H<sub>4</sub>)(I) was isolated as an orange solid (0.72 g, 23% yield). <sup>1</sup>H NMR (CDCl<sub>3</sub>): δ 9.50 (d, *J* = 6 Hz, 1H), 7.98 (s, 2H), 7.59 (d, *J* = 6 Hz, 1H), 7.51 (m, 1H), 7.35 (m, 1H), 7.28 (s, 1H), 7.20 (d, *J* = 7 Hz, 1H), 6.93 (t, *J* = 7 Hz, 1H), 6.74 (d, *J* = 7 Hz, 1H), 2.28 (s, 3H), 1.44 (s, 9H), 1.40 (s, 9H). <sup>13</sup>C NMR (CDCl<sub>3</sub>): δ 163.21, 163.16, 155.92, 153.91, 152.57, 150.00, 146.54, 137.20, 136.54, 133.51, 126.99, 124.19, 123.90, 123.65, 118.37, 117.99, 35.61, 35.56, 30.52, 30.39, 21.65. HRMS electrospray (*m/z*): [M – I – MeCN]<sup>+</sup> calcd for C<sub>25</sub>H<sub>31</sub>IN<sub>2</sub>Pd, 506.1782; Found, 506.1798. Notably, small amounts (~4%) of (dtbpy)Pd(I)<sub>2</sub> were observed in the <sup>1</sup>H and <sup>13</sup>C NMR spectra of most isolated samples of (dtbpy)Pd(*m*-CH<sub>3</sub>C<sub>6</sub>H<sub>4</sub>)(I).

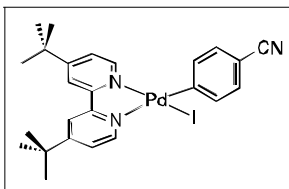

The product (dtbpy)Pd(*p*-CNC<sub>6</sub>H<sub>4</sub>)(I) was isolated as an orange solid (1.38 g, 66% yield). <sup>1</sup>H NMR (CDCl<sub>3</sub>, 500.09 MHz): δ 9.47 (d, *J* = 6 Hz, 1H), 7.97 (s, 1H), 7.95 (s, 1H), 7.58 (d, *J* = 9 Hz, 2H), 7.50 (dd, *J* = 5 Hz, 2 Hz, 1H), 7.43 (d, *J* = 6 Hz, 1H), 7.34 (dd, *J* = 6 Hz, 2 Hz, 1H), 7.25 (d, *J* = 9 Hz, 2H), 1.41 (s, 9H), 1.38 (s, 9H). <sup>13</sup>C NMR (CDCl<sub>3</sub>, 125.75 MHz): δ 163.78, 163.59, 158.15, 155.94, 153.77, 152.59, 149.26, 137.67, 129.18, 124.02, 123.71, 120.14, 118.64, 118.20, 106.32, 35.55, 35.47, 30.31, 30.18. HRMS electrospray (*m/z*): [M + Na]<sup>+</sup> calcd for C<sub>25</sub>H<sub>28</sub>IN<sub>3</sub>Pd, 626.0255; Found, 626.0256. Notably, small amounts (~5%) of (dtbpy)Pd(I)<sub>2</sub> were observed in the <sup>1</sup>H and <sup>13</sup>C NMR spectra of most isolated samples of (dtbpy)Pd(*p*-CNC<sub>6</sub>H<sub>4</sub>)(I).

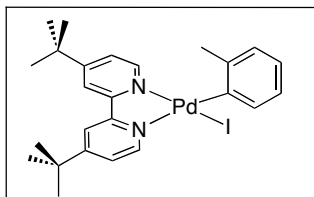

The product (dtbpy)Pd(*o*-tol)(I) was isolated as an orange solid (0.60 g, 19%). <sup>1</sup>H NMR (CDCl<sub>3</sub>): δ 9.45 (d, *J* = 6 Hz, 1H), 7.94 (s, 2H), 7.48 (d, *J* = 6 Hz, 1H), 7.39-7.34 (multiple peaks, 2H), 7.26 (m, 1H), 6.94 (m, 1H), 6.84-6.82 (multiple peaks, 2H), 2.57 (s, 3H), 1.40 (s, 9H), 1.36 (s, 9H). <sup>13</sup>C NMR (CDCl<sub>3</sub>): δ 163.06, 163.02, 155.86, 153.70, 152.28, 149.18, 147.26, 141.28, 136.10, 128.65, 123.98, 123.82, 123.64, 123.09, 118.33, 117.86, 35.45, 35.41, 30.27, 30.23, 26.90. HRMS-electrospray (*m/z*): [M + Na]<sup>+</sup> calcd for C<sub>25</sub>H<sub>31</sub>IN<sub>2</sub>Pd, 615.0464; Found, 615.0477. Notably, small amounts (~7%) of (dtbpy)Pd(I)<sub>2</sub> were observed in the <sup>1</sup>H and <sup>13</sup>C NMR spectra of most isolated samples of (dtbpy)Pd(*o*-tol)(I).

**General procedure for the synthesis of (tmeda)Pd(Aryl)(I):** Under nitrogen, Pd(dba)<sub>2</sub> (2.0 g, 3.48 mmol, 1 equiv) was weighed into a 250 mL round bottom flask and dissolved in THF (50 mL). TMEDA (1.1 g, 9.06 mmol, 2.6 equiv) was added, and the resulting mixture was stirred at 25 °C for 15 min. The appropriate aryl iodide (9.74 mmol, 2.8 equiv) was added, and the reaction was heated at 60 °C for 30 min. In air, the reaction mixture was filtered through a plug of Celite, and the solvent was removed under reduced pressure. The resulting solid was washed with hexanes (3 x 20 mL) and then diethyl ether (3 x 50 mL) to remove all residual dibenzylidene acetone (dba). The product was then dried *in vacuo*.

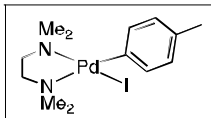

The product (tmeda)Pd(*p*-MeC<sub>6</sub>H<sub>4</sub>)(I) was isolated as an orange solid (1.18 g, 51% yield). <sup>1</sup>H NMR (CDCl<sub>3</sub>): δ 7.06 (d, *J* = 8 Hz, 2H), 6.72 (d, *J* = 8 Hz, 2H), 2.68-2.66 (multiple peaks, 2H), 2.62 (s, 6H), 2.52-2.49 (multiple peaks, 2H), 2.28 (s, 6H), 2.18 (s, 3H). <sup>13</sup>C NMR (CDCl<sub>3</sub>): δ 139.49, 135.89, 131.43, 127.43, 61.98, 58.10, 49.77, 49.56, 20.48. HRMS electrospray (*m/z*): [M – I + MeCN]<sup>+</sup> calcd for C<sub>13</sub>H<sub>23</sub>I<sub>2</sub>N<sub>2</sub>Pd, 354.1162; Found, 354.1166.

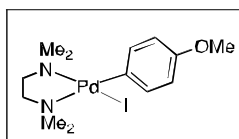

The product (tmeda)Pd(*p*-MeOC<sub>6</sub>H<sub>4</sub>)(I) was isolated as an orange solid (1.23 g, 77% yield). <sup>1</sup>H NMR (CDCl<sub>3</sub>, 500.09 MHz): δ 7.08 (d, *J* = 9 Hz, 2H), 6.61 (d, *J* = 9 Hz, 2H), 3.69 (s, 3H), 2.72-2.70 (multiple peaks, 2H), 2.66 (s, 6H), 2.56-2.54 (multiple peaks, 2H), 2.31 (s, 6H). <sup>13</sup>C NMR (CDCl<sub>3</sub>, 125.75 MHz): δ 156.22, 135.90, 131.70, 112.64, 61.92, 58.09, 54.90, 49.69, 49.53. HRMS electrospray (*m/z*): [M + Na]<sup>+</sup> calcd for C<sub>13</sub>H<sub>23</sub>I<sub>2</sub>OPd, 478.9788; Found, 478.9782.

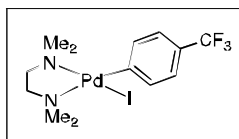

The product (tmeda)Pd(*p*-CF<sub>3</sub>C<sub>6</sub>H<sub>4</sub>)(I) was isolated as an orange solid (1.02 g, 39% yield). <sup>1</sup>H NMR (CDCl<sub>3</sub>): δ 7.35 (d, *J* = 8 Hz, 2H), 7.06 (d, *J* = 8 Hz, 2H), 2.59 (s, 6H), 2.45 (app s, 4H), 2.20 (s, 6H). <sup>19</sup>F NMR (CDCl<sub>3</sub>): δ –61.81 (s, 3F). <sup>13</sup>C NMR (CDCl<sub>3</sub>): δ 152.69, 136.48, 124.77 (q, *J* = 271 Hz), 124.56 (q, *J* = 32 Hz), 121.90 (q, *J* = 4 Hz), 61.93, 58.08, 49.76, 49.60. HRMS electrospray (*m/z*): [M + Na]<sup>+</sup> calcd for C<sub>13</sub>H<sub>20</sub>F<sub>3</sub>I<sub>2</sub>N<sub>2</sub>Pd, 516.9556; Found, 516.9573.

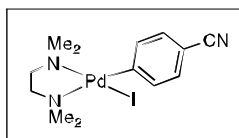

The product (tmeda)Pd(*p*-CNC<sub>6</sub>H<sub>4</sub>)(I) was isolated as an orange solid (0.95 g scale, 0.51 g, 68% yield). <sup>1</sup>H NMR (CDCl<sub>3</sub>): δ 7.44 (d, *J* = 8 Hz, 2H), 7.13 (d, *J* = 8 Hz, 2H), 2.73 (br. s, 2H), 2.67 (s, 6H), 2.57 (br. s, 2H), 2.31 (6H). <sup>13</sup>C NMR (CDCl<sub>3</sub>): δ 156.99, 137.40, 128.46, 119.99, 105.90, 62.12, 58.31, 49.98, 49.86. HRMS electrospray (*m/z*): [M + Na]<sup>+</sup> calcd for C<sub>13</sub>H<sub>20</sub>I<sub>2</sub>N<sub>3</sub>Pd, 473.9634; Found, 473.9644.

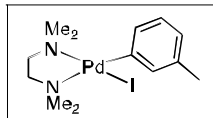

The product (tmeda)Pd(*m*-MeC<sub>6</sub>H<sub>4</sub>)(I) was isolated as an orange solid (1.24 g, 81% yield). <sup>1</sup>H NMR (CDCl<sub>3</sub>): δ 7.05 (s, 1H), 7.00 (d, *J* = 8 Hz, 1H), 6.77 (m, 1H), 6.58 (d, *J* = 7 Hz, 1H), 2.69 (br multiplet, 2H), 2.63 (s, 6H), 2.53 (br multiplet, 2H), 2.29 (s, 6H), 2.18 (s, 3H). <sup>13</sup>C NMR (CDCl<sub>3</sub>): δ 144.46, 136.77, 135.31, 133.21, 125.86, 123.41, 61.92, 58.03, 49.76, 49.67, 49.49 (2 overlapping carbons), 21.29. HRMS electrospray (*m/z*): [M + Na]<sup>+</sup> calcd for C<sub>13</sub>H<sub>23</sub>IN<sub>2</sub>Pd, 462.9838; Found, 462.9843.

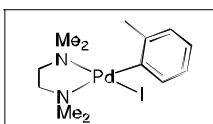

The product (tmeda)Pd(*o*-MeC<sub>6</sub>H<sub>4</sub>)(I) was isolated as an orange solid (0.52 g, 68% yield). <sup>1</sup>H NMR (CDCl<sub>3</sub>): δ 7.17 (d, *J* = 7 Hz, 1 Hz, 1H), 6.82 (m, 1H), 6.77-6.72 (multiple peaks, 2H), 2.86-2.82 (multiple peaks, 2H), 2.70-2.66 (multiple peaks, 11H), 2.45 (s, 3H), 2.16 (s, 3H). <sup>13</sup>C NMR (CDCl<sub>3</sub>): δ 144.55, 141.63, 135.31, 127.76, 123.62, 122.62, 62.03, 58.09, 50.20 (2 overlapping carbons), 48.77, 48.52, 27.50. HRMS electrospray (*m/z*): [M + Na]<sup>+</sup> calcd for C<sub>13</sub>H<sub>23</sub>IN<sub>2</sub>Pd, 462.9838; Found, 462.9844.

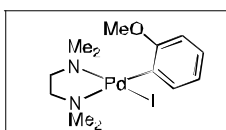

The product (tmeda)Pd(*o*-MeOC<sub>6</sub>H<sub>4</sub>)(I) was isolated as an orange solid (0.61 g, 38% yield). <sup>1</sup>H NMR (CDCl<sub>3</sub>): δ 7.16 (d, *J* = 7 Hz, 1H), 6.82 (t, *J* = 7 Hz, 1H), 6.63 (t, *J* = 7 Hz, 1H), 6.47 (d, 8 Hz, 1H), 3.82 (s, 3H), 2.74-2.62 (multiple peaks, 4H), 2.70 (s, 3H), 2.69 (s, 3H), 2.36 (s, 3H), 2.31 (s, 3H). <sup>13</sup>C NMR (CDCl<sub>3</sub>): δ 161.80, 137.50, 129.74, 123.62, 119.95, 110.13, 61.98, 58.41, 55.75, 50.09 (2 overlapping carbons), 49.73, 49.27. HRMS electrospray (*m/z*): [M + I]<sup>+</sup> calcd for C<sub>13</sub>H<sub>23</sub>IN<sub>2</sub>OPd, 329.0845; Found, 329.0848.

**General procedure for the synthesis of (dtbpy)Pd(Aryl)(CF<sub>3</sub>):** Under nitrogen, (dtbpy)Pd(Aryl)(I) (1 equiv) and CsF (3 equiv) were suspended in THF (0.145 M) in a 25 mL Schlenk flask. This mixture was stirred for 10 min, and then Me<sub>3</sub>SiCF<sub>3</sub> (2 equiv) was added. The reaction was stirred vigorously for 3 h at 22 °C. The solvent was removed under reduced pressure, CH<sub>2</sub>Cl<sub>2</sub> (15 mL) was added to dissolve the product, and the resulting suspension was filtered through a plug of Celite. The plug was washed with CH<sub>2</sub>Cl<sub>2</sub> (2 x 5 mL), the filtrate was concentrated under reduced pressure to (~2 mL), and hexanes (60 mL) was added to precipitate the product. The resulting solid was collected on fritted Büchner funnel, washed with hexanes (3 x 10 mL) and diethyl ether (2 x 2 mL), and dried *in vacuo*. The scale of these syntheses (amount of (dtbpy)Pd(Aryl)(I) starting material) are noted accordingly.

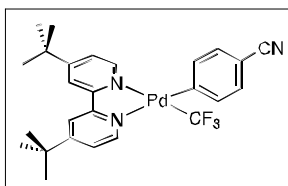

**Complex 1b.** Product **1b** was isolated as a yellow solid (1.2 g scale, 0.59 g, 54% yield).  $^1\text{H}$  NMR ( $\text{CDCl}_3$ ):  $\delta$  9.00 (app. d,  $J = 6$  Hz 1H), 7.99 (s, 1H), 7.96 (s, 1H), 7.76 (d,  $J = 8$  Hz, 2H), 7.54 (d,  $J = 6$  Hz, 1H), 7.50 (d,  $J = 6$  Hz, 1H), 7.32 (d,  $J = 8$  Hz, 2H), 7.28 (d,  $J = 6$  Hz, 1H), 1.43 (s, 9H), 1.36 (s, 9H).  $^{19}\text{F}$  NMR ( $\text{CDCl}_3$ ):  $\delta$  -21.25 (s).  $^{13}\text{C}$  NMR ( $\text{CDCl}_3$ ):  $\delta$  168.76, 164.00, 163.81, 155.40, 154.33, 151.71 (br q,  $J = 4$  Hz), 150.13, 136.94, 134.57 (q,  $J = 364$  Hz), 129.37, 123.71, 123.45, 120.60, 118.33, 118.25, 106.20, 35.46 (2 overlapping carbons), 30.30, 30.23. HRMS electrospray ( $m/z$ ):  $[\text{M} + \text{Na}]^+$  calcd for  $\text{C}_{26}\text{H}_{28}\text{F}_3\text{N}_3\text{Pd}$ , 568.1162; Found, 568.1166.

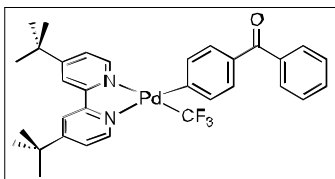

**Complex 1d.** Product **1d** was isolated as a yellow solid (1.0 g scale, 0.47 g, 51% yield).  $^1\text{H}$  NMR ( $\text{CDCl}_3$ ):  $\delta$  9.02 (br multiplet, 1H), 7.98 (s, 1H), 7.94 (s, 1H), 7.83 (d,  $J = 7$  Hz, 2H), 7.78 (d,  $J = 8$  Hz, 2H), 7.59-7.51 (multiple peaks, 5H), 7.48-7.43 (multiple peaks, 2H), 7.23 (resonance overlaps with  $\text{CDCl}_3$  peak, 1H), 1.42 (s, 9H), 1.35 (s, 9H).  $^{19}\text{F}$  NMR ( $\text{CDCl}_3$ ):  $\delta$  -20.86 (s).  $^{13}\text{C}$  NMR ( $\text{CDCl}_3$ ):  $\delta$  197.68, 169.14 (q,  $J = 11$  Hz), 163.78, 163.66, 155.39, 154.39, 151.73 (q,  $J = 5$  Hz), 150.44, 138.75, 135.99, 134.15 (q,  $J = 364$  Hz), 132.63, 131.50, 129.91, 128.12, 127.96, 123.60, 123.39, 118.21, 118.08, 35.43 (2 carbon resonances overlapping), 30.31, 30.24. HRMS electrospray ( $m/z$ ):  $[\text{M} + \text{Na}]^+$  calcd for  $\text{C}_{32}\text{H}_{33}\text{F}_3\text{N}_2\text{OPd}$ , 605.1596; Found, 605.1603.

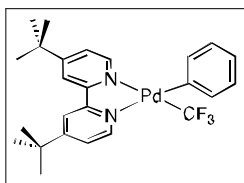

**Complex 1e.** Product **1e** was isolated as a yellow solid (0.53 g scale, 0.23 g, 47% yield).  $^1\text{H}$  NMR ( $\text{CDCl}_3$ ):  $\delta$  8.95 (app. s, 1H), 7.94 (s, 1H), 7.90 (s, 1H), 7.59-7.45 (multiple peaks, 4H), 7.17 (br d,  $J = 4$  Hz, 1H), 7.04-7.00 (multiple peaks, 2H), 6.94 (m, 1H), 1.37 (s, 9H), 1.29 (s, 9H).  $^{19}\text{F}$  NMR ( $\text{CDCl}_3$ ):  $\delta$  -20.45 (s).  $^{13}\text{C}$  NMR ( $\text{CDCl}_3$ ):  $\delta$  163.40, 163.39, 157.66 (q,  $J = 10$  Hz), 155.33, 154.33, 151.62 (q,  $J = 4$  Hz), 150.48, 135.90, 135.73 (q,  $J = 369$  Hz), 126.86, 123.44, 123.21, 122.94, 118.12, 117.92, 35.36,

35.34, 30.28, 30.21. HRMS electrospray (m/z):  $[M + Na]^+$  calcd for  $C_{25}H_{29}F_3N_2Pd$ , 543.1215; Found, 543.1223.

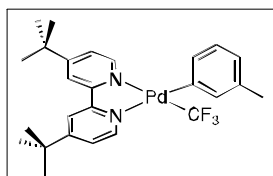

**Complex 1i.** NOTE: The product is partially soluble in hexanes and diethyl ether; therefore, pentanes (60 mL) was used to precipitate the product. The resulting solid was filtered over a fritted Büchner funnel, washed with pentanes (3 x 10 mL) and dried *in vacuo*. Product **1i** was isolated as a yellow solid (0.72 g scale, 0.35 g, 54% yield).  $^1H$  NMR ( $CDCl_3$ ):  $\delta$  8.94 (br. d,  $J = 4$  Hz, 1H), 7.93 (s, 1H), 7.89 (s, 1H), 7.59 (d,  $J = 6$  Hz, 1H), 7.44 (br. d,  $J = 5$  Hz, 1H), 7.37 (s, 1H), 7.30 (br. d,  $J = 8$  Hz, 1H), 7.17 (br. d,  $J = 6$  Hz, 1H), 6.90 (m, 1H), 6.74 (br. d,  $J = 7$  Hz, 1H), 2.22 (s, 3H), 1.36 (s, 9H), 1.29 (s, 9H).  $^{19}F$  NMR ( $CDCl_3$ ):  $\delta$  -20.33 (s).  $^{13}C$  NMR ( $CDCl_3$ ):  $\delta$  163.35, 157.41 (q,  $J = 10$  Hz), 155.30, 154.31, 151.58 (q,  $J = 4$  Hz), 150.55, 135.93 (q,  $J = 364$  Hz), 135.73, 136.48, 132.74, 126.48, 123.83, 123.58, 123.41, 123.20, 118.08, 117.89, 35.34, 35.33, 30.27, 30.19, 21.63. HRMS electrospray (m/z):  $[M + Na]^+$  calcd for  $C_{26}H_{31}F_3N_2Pd$ , 557.1372; Found, 557.1383.

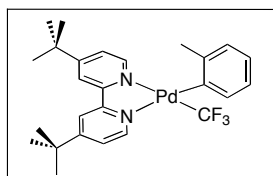

Product (dtbpy)Pd(*o*-tol)( $CF_3$ ) was isolated as a yellow solid (0.50 g scale, 0.20 g, 45%).  $^1H$  NMR ( $CDCl_3$ ):  $\delta$  9.05 (br d,  $J = 4$  Hz, 1H), 7.98 (s, 1H), 7.93 (s, 1H), 7.58 (d,  $J = 7$  Hz, 1H), 7.53 (d,  $J = 6$  Hz, 1H), 7.46 (d,  $J = 6$  Hz, 1H), 7.22 (m, 1H), 7.03 (d,  $J = 6$  Hz, 1H), 6.96-6.89 (multiple peaks, 2H), 2.61 (s, 3H), 1.42 (s, 9H), 1.35 (s, 9H).  $^{19}F$  NMR ( $CDCl_3$ ):  $\delta$  -20.51 (s).  $^{13}C$  NMR ( $CDCl_3$ ):  $\delta$  163.29, 159.17 ( $J = 10$  Hz), 155.43, 154.28, 151.71, 151.67, 150.06, 141.58, 136.08 ( $J = 361$  Hz), 135.45, 127.90, 123.55 (two overlapping carbons), 123.38, 122.59, 118.03, 117.92, 35.38 (two overlapping carbons), 30.34, 30.26, 26.46. HRMS electrospray (m/z):  $[M + Na]^+$  calcd for  $C_{26}H_{31}F_3N_2Pd$ , 557.1372; Found, 557.1384. Anal. Calc. for  $C_{23}H_{31}F_3N_2Pd$ : C, 58.37, H, 5.84, N, 5.24; Found: C, 58.29, H, 5.95, N, 5.24. By  $^1H$ ,  $^{19}F$ ,  $^{13}C$  NMR spectroscopy, <5% of (dtbpy)Pd( $CF_3$ )<sub>2</sub> was observed.

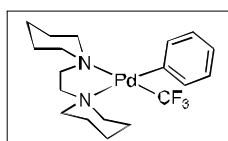

**Complex 9.** Product **9** was synthesized from (dpe)Pd(Ph)(CF<sub>3</sub>) [dpe = 1,2-dipiperidinoethane] according to the procedure described for (tmeda)Pd(Aryl)(CF<sub>3</sub>). Under nitrogen, (dpe)Pd(Ph)(I) (1.0 g, 1.97 mmol, 1 equiv) and CsF (3 equiv) were suspended in THF (0.145 M) in a 25 mL Schlenk flask. This mixture was stirred for 10 min and then Me<sub>3</sub>SiCF<sub>3</sub> (2 equiv) was added. The reaction was stirred vigorously for 6 h at 23 °C. The solvent was removed under reduced pressure, CH<sub>2</sub>Cl<sub>2</sub> (15 mL) was added to dissolve the product, and the resulting suspension was filtered through a plug of Celite. The plug was washed with CH<sub>2</sub>Cl<sub>2</sub> (2 x 5 mL), the filtrate was concentrated under reduced pressure to (~2 mL), and hexanes (60 mL) was added to precipitate the product. The resulting solid was collected on fritted Buchner funnel, washed with hexanes (3 x 10 mL) and diethyl ether (2 x 2 mL), and dried *in vacuo*. The product was isolated as a pale yellow solid (0.59 g, 67% yield). <sup>1</sup>H NMR (CD<sub>2</sub>Cl<sub>2</sub>): δ 7.42 (d, *J* = 7 Hz, 2H), 6.97-6.93 (multiple peaks, 2H), 6.87 (m, 1H), 3.56-2.63 (multiple peaks, 12H), 1.77-0.99 (multiple peaks, 12H). <sup>19</sup>F NMR (CD<sub>2</sub>Cl<sub>2</sub>): δ -21.02 (s). <sup>13</sup>C NMR (CD<sub>2</sub>Cl<sub>2</sub>): δ 159.27 (q, *J* = 10 Hz), 136.37, 135.14 (q, *J* = 365 Hz), 126.38, 122.59, 54.42, 54.16, 50.82, 49.73, 24.34, 24.11, 19.63, 19.16. HRMS electrospray (*m/z*): [M + Na]<sup>+</sup> calcd for C<sub>19</sub>H<sub>29</sub>F<sub>3</sub>N<sub>2</sub>Pd, 471.1215; Found, 471.1203.

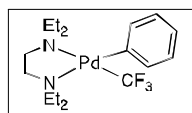

**Complex 10.** Product **10** was synthesized from (teeda)Pd(Ph)(I) [teeda = teeda = *N,N,N',N'*-tetraethylethylenediamine] according to the procedure described for (tmeda)Pd(Ph)(CF<sub>3</sub>). Under nitrogen, (teeda)Pd(Ph)(I) (0.4 g, 0.80 mmol, 1 equiv) and CsF (3 equiv) were suspended in THF (0.145 M) in a 25 mL Schlenk flask. This mixture was stirred for 10 min and then Me<sub>3</sub>SiCF<sub>3</sub> (2 equiv) was added. The reaction was stirred vigorously for 20 h at 23 °C. The solvent was removed under reduced pressure, CH<sub>2</sub>Cl<sub>2</sub> (15 mL) was added to dissolve the product, and the resulting suspension was filtered through a plug of Celite. The plug was washed with CH<sub>2</sub>Cl<sub>2</sub> (2 x 5 mL), the filtrate was concentrated under reduced pressure to (~2 mL), and hexanes (60 mL) was added to precipitate the product. The resulting solid was collected on fritted Buchner funnel, washed with hexanes (3 x 10 mL) and diethyl ether (2 x 2 mL), and dried *in vacuo*. The product was isolated as a yellow solid (0.20 g, 56% yield). <sup>1</sup>H NMR (CD<sub>2</sub>Cl<sub>2</sub>): δ 7.42 (d, *J* = 8 Hz, 2H), 6.90 (m, 2H), 6.82 (m, 1H), 3.07-2.98 (multiple peaks, 2H), 2.82-2.73 (multiple peaks, 2H), 2.62 (s, 4H), 2.51-2.39 (multiple peaks, 4H), 1.36 (t, *J* = 7 Hz, 6H), 1.29 (t, *J* = 7 Hz, 6H). <sup>19</sup>F NMR (CD<sub>2</sub>Cl<sub>2</sub>): δ -21.10 (s). <sup>13</sup>C NMR (CD<sub>2</sub>Cl<sub>2</sub>): δ 157.88 (q, *J* = 10 Hz), 134.54 (q, *J* = 366 Hz), 136.26, 126.12 (q, *J* = 12 Hz), 122.46, 51.50, 51.38, 49.82, 48.40, 11.13, 11.06. HRMS electrospray (*m/z*): [M + Na]<sup>+</sup> calcd for C<sub>17</sub>H<sub>29</sub>F<sub>3</sub>N<sub>2</sub>Pd, 447.1215; Found, 447.1219.

**General procedure for the synthesis of (tmeda)Pd(Aryl)(CF<sub>3</sub>) 11:** Under nitrogen, (tmeda)Pd(Aryl)(I) (1.0 g, 2.02-2.30 mmol, 1 equiv) and CsF (3 equiv) were suspended in THF (0.145 M) in a 25 mL Schlenk

flask. This mixture was stirred for 10 min and then  $\text{Me}_3\text{SiCF}_3$  (2 equiv) was added. The reaction was stirred vigorously for 3 h at 22 °C. The solvent was removed under reduced pressure,  $\text{CH}_2\text{Cl}_2$  (15 mL) was added to dissolve the product, and the resulting suspension was filtered through a plug of Celite. The plug was washed with  $\text{CH}_2\text{Cl}_2$  (2 x 5 mL), the filtrate was concentrated under reduced pressure to (~2 mL), and hexanes (60 mL) was added to precipitate the product. The resulting solid was collected on fritted Buchner funnel, washed with hexanes (3 x 10 mL) and diethyl ether (2 x 2 mL), and dried *in vacuo*. Some substrates were synthesized on a different scale with the same equivalents of materials as described above. These substrates and their scale of synthesis (as determined by amount of (tmeda)Pd(Aryl)(I) used) are noted accordingly.

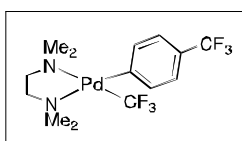

**Complex 11b.** Product **11b** was isolated as a yellow solid (0.37 g, 42% yield).  $^1\text{H}$  NMR ( $\text{CDCl}_3$ ):  $\delta$  7.61 (d,  $J$  = 8 Hz, 2H), 7.19 (d,  $J$  = 8 Hz, 2H), 2.69 (s, 6H), 2.59 (app. s, 4H), 2.20 (s, 6H).  $^{19}\text{F}$  NMR ( $\text{CDCl}_3$ ):  $\delta$  -21.14 (s, 3F), -61.67 (s, 3F).  $^{13}\text{C}$  NMR ( $\text{CDCl}_3$ ):  $\delta$  163.82 (q,  $J$  = 11 Hz), 136.05, 133.69 (q,  $J$  = 365 Hz), 125.19 (q,  $J$  = 271 Hz), 124.81 (q,  $J$  = 32 Hz), 122.44, 60.37, 59.84, 49.03, 48.72. HRMS electrospray ( $m/z$ ):  $[\text{M} + \text{Na}]^+$  calcd for  $\text{C}_{14}\text{H}_{20}\text{F}_6\text{N}_2\text{Pd}$ , 417.0581; Found, 417.0586.

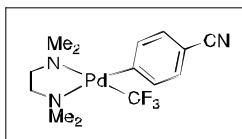

**Complex 11c.** Product **11c** was isolated as a yellow solid (0.47 scale, 0.21 g, 51% yield).  $^1\text{H}$  NMR ( $\text{CDCl}_3$ )  $\delta$  7.64 (d,  $J$  = 7 Hz, 2H), 7.22 (d,  $J$  = 7 Hz, 2H), 2.69 (s, 6H), 2.60 (app. s, 4H), 2.21 (s, 6H).  $^{19}\text{F}$  NMR ( $\text{CDCl}_3$ ):  $\delta$  -21.60 (s).  $^{13}\text{C}$  NMR ( $\text{CDCl}_3$ ):  $\delta$  168.37 (q,  $J$  = 10 Hz), 136.91, 133.12 (q,  $J$  = 365 Hz), 128.65, 120.55, 105.86, 60.40, 59.96, 49.12, 48.82. HRMS electrospray ( $m/z$ ):  $[\text{M} + \text{Na}]^+$  calcd for  $\text{C}_{14}\text{H}_{30}\text{F}_3\text{N}_3\text{Pd}$ , 416.0542 Found, 416.0537.

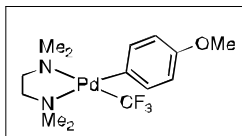

**Complex 11d.** Product **11d** was isolated as a yellow solid (0.89 g, 34% yield).  $^1\text{H}$  NMR ( $\text{CDCl}_3$ ):  $\delta$  7.33 (d,  $J$  = 8 Hz, 2H), 6.64 (d,  $J$  = 8 Hz, 2H), 3.72 (s, 3H), 2.67 (s, 6H), 2.56 (app. s, 4H), 2.20 (s, 6H).  $^{19}\text{F}$  NMR ( $\text{CDCl}_3$ ):  $\delta$  -20.80 (s).  $^{13}\text{C}$  NMR ( $\text{CDCl}_3$ ):  $\delta$  155.94, 144.95 (q,  $J$  = 11 Hz), 135.65, 134.74 (q,  $J$  = 365 Hz), 112.24, 60.23, 59.63, 54.80, 48.87, 48.52. HRMS electrospray ( $m/z$ ):  $[\text{M} + \text{Na}]^+$  calcd for  $\text{C}_{14}\text{H}_{23}\text{F}_3\text{N}_2\text{Pd}$ , 421.0695; Found, 421.0699.



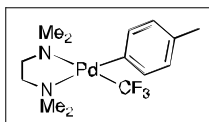

**Complex 11f.** Product **11f** was isolated as a yellow solid (0.51 g, 57% yield).  $^1\text{H}$  NMR ( $\text{CDCl}_3$ ):  $\delta$  7.33 (d,  $J = 8$  Hz, 2H), 6.81 (d,  $J = 8$  Hz, 2H), 2.67 (s, 6H), 2.56 (br multiplet, 4H), 2.22 (s, 6H), 2.20 (s, 3H).  $^{19}\text{F}$  NMR ( $\text{CDCl}_3$ ):  $\delta$  -20.86 (s).  $^{13}\text{C}$  NMR ( $\text{CDCl}_3$ ):  $\delta$  151.74 (q,  $J = 11$  Hz), 135.52, 134.93 (q,  $J = 365$  Hz), 131.37, 127.17, 60.33, 59.66, 48.91, 48.63, 20.85. HRMS electrospray ( $m/z$ ):  $[\text{M} + \text{Na}]^+$  calcd for  $\text{C}_{14}\text{H}_{23}\text{F}_3\text{N}_2\text{Pd}$ , 363.0864; Found, 363.0863.

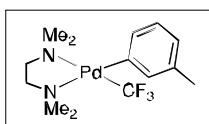

**Complex 11g.** Product **11g** was isolated as a yellow solid (0.37 g, 42% yield).  $^1\text{H}$  NMR ( $\text{CDCl}_3$ ):  $\delta$  7.30 (s, 1H), 7.24 (d,  $J = 7$  Hz, 1H), 6.85 (m, 1H), 6.70 (d,  $J = 7$  Hz, 1H), 2.65 (s, 6H), 2.54 (app. s, 4H), 2.23 (s, 3H), 2.19 (s, 6H).  $^{19}\text{F}$  NMR ( $\text{CDCl}_3$ ):  $\delta$  -20.82 (s).  $^{13}\text{C}$  NMR ( $\text{CDCl}_3$ ):  $\delta$  156.30 (q,  $J = 10$  Hz), 136.49, 134.92 (q,  $J = 365$  Hz), 135.05, 132.83, 125.82, 123.48, 60.40, 59.70, 48.96, 48.70, 21.54. HRMS electrospray ( $m/z$ ):  $[\text{M} + \text{Na}]^+$  calcd for  $\text{C}_{14}\text{H}_{23}\text{F}_3\text{N}_2\text{Pd}$ , 405.0746; Found, 405.0758.

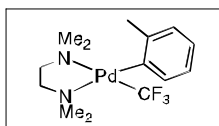

**Complex 11h.** Product **11h** was isolated as a yellow solid (1.5 g scale, 0.89 g, 59% yield).  $^1\text{H}$  NMR ( $\text{CDCl}_3$ ):  $\delta$  7.42 (d,  $J = 7$  Hz, 1H), 6.91 (m, 1H), 6.85-6.81 (multiple peaks, 2H), 2.72-2.67 (multiple peaks, 11 H), 2.48-2.45 (multiple peaks, 2H), 2.32 (s, 3H), 2.09 (s, 3H).  $^{19}\text{F}$  NMR ( $\text{CDCl}_3$ ):  $\delta$  -20.819 (s).  $^{13}\text{C}$  NMR ( $\text{CDCl}_3$ ):  $\delta$  157.67 (q,  $J = 11$  Hz), 141.76, 135.30, 134.98 (q,  $J = 365$  Hz), 127.11, 123.01, 122.27, 60.24, 59.56, 49.37, 48.94, 47.93, 47.78, 26.33. HRMS electrospray ( $m/z$ ):  $[\text{M} + \text{Na}]^+$  calcd for  $\text{C}_{14}\text{H}_{23}\text{F}_3\text{N}_2\text{Pd}$ , 405.0746; Found, 405.0734.

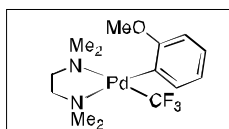

**Complex 11i.** Product **11i** was isolated as a yellow solid (0.50 g scale, 0.04 g, 10% yield).  $^1\text{H}$  NMR ( $\text{CDCl}_3$ ):  $\delta$  7.40 (d,  $J = 7$  Hz, 1H), 6.93 (m, 1H), 6.69 (m, 1H), 6.58 (d,  $J = 8$  Hz, 1H), 3.82 (s, 3H), 2.73 (s, 3H), 2.69 (s, 3H), 2.65-2.60 (multiple peaks, 2H), 2.53-2.46 (multiple peaks, 2H), 2.25 (s, 3H), 2.21 (s,

3H).  $^{19}\text{F}$  NMR ( $\text{CDCl}_3$ ):  $\delta$   $-20.74$  (s).  $^{13}\text{C}$  NMR ( $\text{CDCl}_3$ ):  $\delta$  162.26, 143.25 (q,  $J$  = 11 Hz), 136.83, 133.79 (q,  $J$  = 365 Hz), 123.44, 119.76, 109.70, 60.22, 60.00, 55.61, 49.57, 49.03, 48.48, 48.36. HRMS electrospray ( $m/z$ ):  $[\text{M} + \text{Na}]^+$  calcd for  $\text{C}_{14}\text{H}_{23}\text{F}_3\text{N}_2\text{OPd}$ , 421.0695; Found, 421.0699.

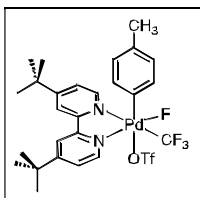

**Synthesis of  $(\text{dtbpy})\text{Pd}^{\text{IV}}(4\text{-CH}_3\text{C}_6\text{H}_5)(\text{CF}_3)(\text{F})(\text{OTf})$ , **5**.** Under  $\text{N}_2$ , a solution of complex **1g** (60 mg, 0.11 mmol, 1 equiv) in DCE (1 mL) was added to a suspension of 1-fluoro-2,4,6-trimethylpyridium triflate (NFTPT) (45 mg, 0.15 mmol, 1.4 equiv) in DCE (1 mL). An additional 0.8 mL of DCE was added, and the reaction mixture was stirred at  $23^\circ\text{C}$  for 45 min. The solvent was then removed *in vacuo*, and the residue was taken up in a mixture of DCE (0.5 mL) and toluene (2 mL). This suspension was filtered through a plug of Celite, which was washed with additional toluene (0.5 mL). Pentane (10 mL) was then added, and the resulting suspension was sonicated for 5 min. The solids were allowed to settle, and then the solution was removed by decantation. Fresh pentane (10 mL) was added, and the sonication process was repeated. The residue was dried *in vacuo*. The product was recrystallized by vapor diffusion of pentanes into a concentrated DCE solution of **5** at  $-30^\circ\text{C}$ . The resulting solid was washed with cold DCE (3 x 2 mL) and dried *in vacuo*, yielding **5** as a yellow solid (21 mg, 27% yield).  $^1\text{H}$  NMR ( $\text{CD}_3\text{CN}$ ):  $\delta$  8.93-8.91 (multiple peaks, 2H), 8.53 (s, 1H), 8.46 (s, 1H), 8.40 (m, 1H), 7.95 (m, 1H), 6.87-6.85 (multiple peaks, 2H), 6.81-6.79 (multiple peaks, 2H), 2.24 (s, 3H), 1.55 (s, 9H), 1.47 (s, 9H).  $^{19}\text{F}$  NMR ( $\text{CD}_3\text{CN}$ ):  $\delta$   $-31.23$  (d,  $J$  = 9 Hz, 3F, Pd- $\text{CF}_3$ ),  $-79.30$  (s, 3F, Pd- $\text{OTf}$ ),  $-256.42$  (br q, 1F, Pd-F). Calc. for  $\text{C}_{27}\text{H}_{31}\text{F}_7\text{N}_2\text{O}_3\text{PdS}$ : C, 46.13, H, 4.42, N, 3.98 Found: C, 45.87, H, 4.51, N, 4.12. Splitting of the aryl-Pd carbon signal by both F and  $\text{CF}_3$  groups could not be seen because this signal was in the baseline.

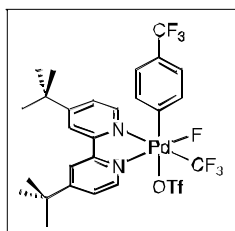

**Synthesis of  $(\text{dtbpy})\text{Pd}^{\text{IV}}(4\text{-CF}_3\text{C}_6\text{H}_5)(\text{CF}_3)(\text{F})(\text{OTf})$ , **6**.** Under  $\text{N}_2$ , a solution of complex **1c** (60 mg, 0.09 mmol, 1 equiv) in DCE (0.5 mL) was added to a suspension of 1-fluoro-2,4,6-trimethylpyridium triflate (NFTPT) (38 mg, 0.13 mmol, 1.4 equiv) in DCE (0.5 mL). An additional 0.5 mL of DCE was added, and

the reaction mixture was stirred at 23 °C for 45 min. The solvent was then removed *in vacuo*, and the residue was taken up in a mixture of DCE (0.5 mL) and toluene (2 mL). This suspension was filtered through a plug of Celite, which was washed with additional toluene (0.5 mL). Pentane (10 mL) was then added, and the resulting suspension was sonicated for 5 min. The solids were allowed to settle, and then the solution was removed by decantation. Fresh pentane (10 mL) was added, and the sonication process was repeated. The residue was dried *in vacuo*. The product was recrystallized by vapor diffusion of pentanes into a concentrated DCE solution of **6** at –30 °C. The resulting solid was washed with cold DCE (3 x 2 mL) and dried *in vacuo*, yielding **6** as a yellow solid (4.3 mg, 2% yield). <sup>1</sup>H NMR (CD<sub>3</sub>CN): δ 8.88 (d, *J* = 6 Hz, 1H), 8.85 (d, *J* = 6 Hz, 1H), 8.49 (s, 1H), 8.41 (s, 1H), 8.00 (m, 1H), 7.90 (m, 1 H), 7.32 (d, *J* = 9 Hz, 2H), 7.10 (d, *J* = 9 Hz, 2H), 1.50 (s, 9H), 1.41 (s, 9H). <sup>19</sup>F NMR (CD<sub>3</sub>CN): δ –30.72 (d, *J* = 8 Hz, 3F, Pd<sup>IV</sup>–CF<sub>3</sub>), –63.10 (s, 3F, Pd<sup>IV</sup>–ArylCF<sub>3</sub>), –79.35 (s, 3F, Pd<sup>IV</sup>–OTf), –254.55 (br. q, *J* = 10 Hz, 1F, Pd<sup>IV</sup>–F). Anal. Calc. for C<sub>27</sub>H<sub>28</sub>F<sub>10</sub>N<sub>2</sub>O<sub>3</sub>PdS: C, 42.84, H, 3.73, N, 3.70 Found: C, 42.55, H, 3.83, N, 3.78. Splitting of the aryl–Pd carbon signal by F, CF<sub>3</sub> and Aryl–CF<sub>3</sub> groups (qqd) could not be seen by <sup>13</sup>C NMR because this signal was in the baseline.

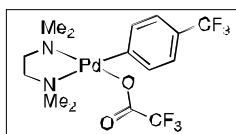

Under N<sub>2</sub>, (tmeda)Pd(*p*-CF<sub>3</sub>Ph)(I) (500 mg, 1.01 mmol, 1 equiv) and AgTFA (246 mg, 1.11 mmol, 1.1 equiv) were dissolved in CH<sub>2</sub>Cl<sub>2</sub> (5 mL) in a 20 mL vial. The reaction was stirred vigorously for 30 min. The solvent was then removed under reduced pressure. CH<sub>2</sub>Cl<sub>2</sub> (50 mL) was added, and the resulting suspension was filtered through a plug of Celite. The filtrate was concentrated under reduced pressure to ~2 mL, and hexanes (30 mL) was added to precipitate the product. The resulting solid was collected on a fritted filter, washed with hexanes (50 mL), and dried *in vacuo*. The product was isolated as a pale-yellow solid (430 mg, 88% yield). <sup>1</sup>H NMR (CDCl<sub>3</sub>): δ 7.55 (d, *J* = 8 Hz, 2H), 7.17 (d, *J* = 8 Hz, 2H), 2.76 (m, 2H), 2.59 (m, 2H), 2.58 (s, 6H), 2.50 (s, 6H). <sup>19</sup>F NMR (CDCl<sub>3</sub>): δ –61.83 (s, 3F), –74.51 (s, 3F). <sup>13</sup>C NMR (CDCl<sub>3</sub>): δ 155.10, 134.54, 126.20, 125.79(q, *J* = 32 Hz), 124.88 (q, *J* = 272 Hz), 122.29 (q, *J* = 4 Hz), 115.38 (q, *J* = 292 Hz), 63.63, 57.62, 51.55, 47.78. HRMS electrospray (*m/z*): [M – TFA + MeCN]<sup>+</sup> calcd for C<sub>15</sub>H<sub>20</sub>F<sub>6</sub>N<sub>2</sub>O<sub>2</sub>Pd, 408.0879; Found, 408.0881.

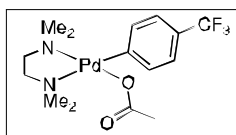

Under N<sub>2</sub>, (tmeda)Pd(*p*-CF<sub>3</sub>Ph)(I) (500 mg, 1.01 mmol, 1 equiv) and AgOAc (186 mg, 1.11 mmol, 1.1 equiv) were dissolved in CH<sub>2</sub>Cl<sub>2</sub> (5 mL) in a 20 mL vial. The reaction was stirred vigorously for 30 min.

The solvent was then removed under reduced pressure. CH<sub>2</sub>Cl<sub>2</sub> (50 mL) was added, and the resulting suspension was filtered through a plug of Celite. The filtrate was concentrated under reduced pressure to ~2 mL, and hexanes (30 mL) was added to precipitate the product. The resulting solid was collected on a fritted filter, washed with hexanes (50 mL), and dried *in vacuo*. The product was isolated as a yellow solid (326 mg, 76% yield). <sup>1</sup>H NMR (CDCl<sub>3</sub>): δ 7.60 (d, *J* = 8 Hz, 2H), 7.14 (d, *J* = 8 Hz, 2H), 2.71 (m, 2H), 2.59 (s, 6H), 2.56 (m, 2H), 2.46 (s, 6H). <sup>19</sup>F NMR (CDCl<sub>3</sub>): δ -61.76 (s). <sup>13</sup>C NMR (CDCl<sub>3</sub>): δ 176.94, 157.53, 135.15, 125.25 (q, *J* = 32 Hz), 125.14 (q, *J* = 272 Hz), 122.09 (q, *J* = 4 Hz), 63.37, 57.92, 51.42, 48.17, 23.83. HRMS electrospray (*m/z*): [M + Na]<sup>+</sup> calcd for C<sub>15</sub>H<sub>23</sub>F<sub>3</sub>N<sub>2</sub>O<sub>2</sub>Pd, 408.0879; Found, 408.0880.

Procedure for the synthesis of (tmeda)Pd(*p*-CF<sub>3</sub>Ph)(CF<sub>3</sub>) (11b) from (tmeda)Pd(*p*-CF<sub>3</sub>Ph)(TFA). Under N<sub>2</sub>, (tmeda)Pd(*p*-CF<sub>3</sub>Ph)(TFA) (416 mmol, 1 equiv) and CsF (2 equiv) were dissolved in THF (0.04 M) in a 25 mL Schlenk flask. Me<sub>3</sub>SiCF<sub>3</sub> (10 equiv) was added. The reaction was stirred vigorously for 2 h at 22 °C. The solvent was then removed under reduced pressure. CH<sub>2</sub>Cl<sub>2</sub> (50 mL) was added, and the resulting suspension was filtered through a plug of Celite. The plug was washed with CH<sub>2</sub>Cl<sub>2</sub> (40 mL), the filtrate was concentrated under reduced pressure to ~5 mL, and hexanes (60 mL) was added to precipitate the product. The resulting solids were collected on a fritted filter, washed with hexanes (50 mL), and dried *in vacuo* to afford **10b** in 56% yield.

Procedure for the synthesis of (tmeda)Pd(*p*-CF<sub>3</sub>Ph)(CF<sub>3</sub>) (11b) from (tmeda)Pd(*p*-CF<sub>3</sub>Ph)(OAc). Under N<sub>2</sub>, (tmeda)Pd(*p*-CF<sub>3</sub>Ph)(OAc) (469 mmol, 1 equiv) and CsF (2 equiv) were dissolved in THF (0.04 M) in a 25 mL Schlenk flask. Me<sub>3</sub>SiCF<sub>3</sub> (10 equiv) was added. The reaction was stirred vigorously for 2 h at 22 °C. The solvent was then removed under reduced pressure. CH<sub>2</sub>Cl<sub>2</sub> (50 mL) was added, and the resulting suspension was filtered through a plug of Celite. The plug was washed with CH<sub>2</sub>Cl<sub>2</sub> (40 mL), the filtrate was concentrated under reduced pressure to ~5 mL, and hexanes (60 mL) was added to precipitate the product. The resulting solids were collected on a fritted filter, washed with hexanes (50 mL), and dried *in vacuo* to afford **10b** in 61% yield.

**General procedure for oxidatively induced Aryl-CF<sub>3</sub> coupling from 1a-1i, (dtbpy)Pd(*o*-tol)(CF<sub>3</sub>). 9.**

**10 and 11a-11i.** The Pd<sup>II</sup> trifluoromethyl complex (40 mg, 1 equiv) was dissolved in an appropriate volume of nitrobenzene to make a 0.084 M solution. The solution was added to a 4 mL scintillation vial containing 1-fluoro-2,4,6-trimethylpyridium triflate (2 equiv) and a Teflon®-coated stir bar. The vial was purged with nitrogen, sealed with a Teflon®-lined cap, shaken vigorously, and then stirred at 23 °C for 1 h or 80 °C for 3h. The resulting light to dark brown mixture was cooled to room temperature, 4-fluoroanisole was added as an internal standard (under air), and the reactions were analyzed by <sup>19</sup>F NMR spectroscopy. The identities of the organic reductive elimination products were confirmed by comparison to authentic samples of these materials. The authentic sample was spiked into the crude reaction

mixtures, and, in each case, the  $^{19}\text{F}$  NMR resonances were coincident. Reactions with complexes **1a-1k**, **11a**, **11f** and **11g** were conducted on a 50 mg scale.

*It is important to note that the optimal conditions for  $^{19}\text{F}$  NMR spectroscopic analysis of these reactions were as follows: spectral window of  $-10$  to  $-150$  ppm, relaxation delay = 2 s, and acquisition time = 2 s. These conditions were required due to the faster relaxation time of the standard relative to the trifluoromethylated Arene products.*

#### **Procedure to determine rate of reductive elimination from Pd<sup>IV</sup> complex 4.**

In a  $\text{N}_2$ -filled drybox, complex **4** (14 mg, 0.0198 mmol, 1.0 equiv) was added to a screw-cap NMR tube and dissolved in dry  $\text{NO}_2\text{Ph-}d_5$  (0.4 mL). The internal standard, 4-fluoroanisole was added (50  $\mu\text{L}$  of a stock solution in dry DCE, 0.0198 mmol, 1 equiv), and the tube was sealed with a Teflon®-lined cap. The tube was immediately placed in an NMR spectrometer with the temperature pre-equilibrated at 60  $^\circ\text{C}$ , and the reaction was allowed to equilibrate for three minutes. The rate of reductive elimination was studied using  $^{19}\text{F}$  NMR spectroscopy by monitoring the appearance of product **2a** (1-fluoro-4-benzotrifluoride). The data was fit to a first order kinetic plot using Sigma Plot 10. A representative reaction profile is shown in **Figure S1**.

**Figure S1.** Representative Kinetics for the Reductive Elimination from **4** to Form **2a** at 60  $^\circ\text{C}$

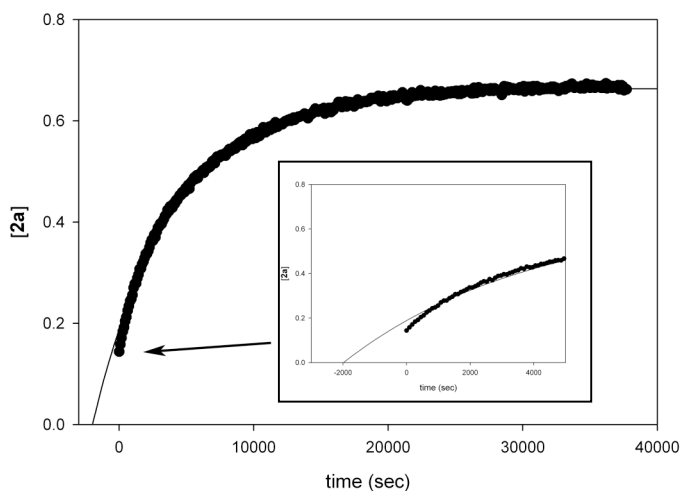

**Figure S2.** Array Spectrum Demonstrating the Reductive Elimination of **4** to **2a** in  $\text{NO}_2\text{Ph-}d_5$  at 60  $^\circ\text{C}$

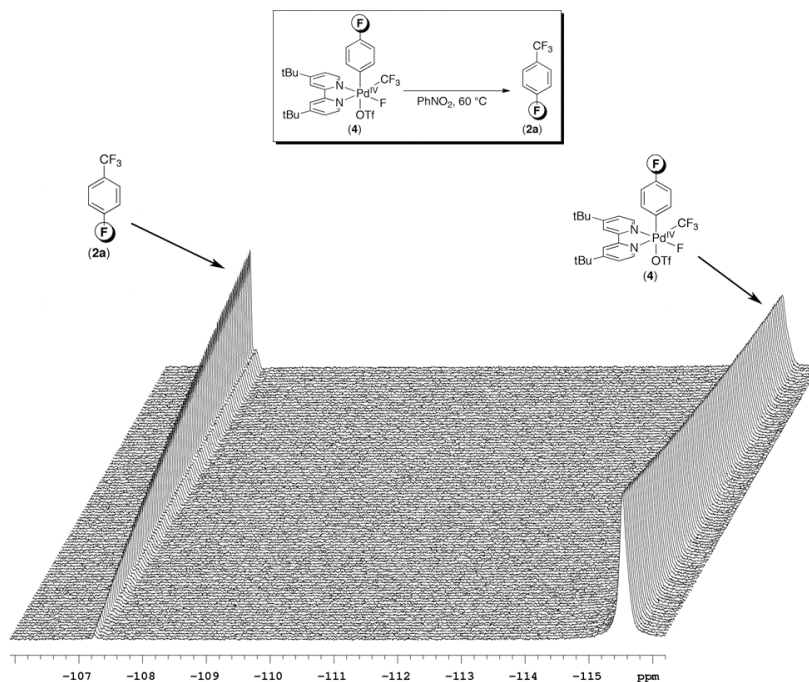

As seen in Figure S1, the rate of product-formation changes as the reaction progresses. This is clearly seen at the beginning of the reaction (highlighted in the box). To confirm that this was the case, we plotted the rate data as function of percent conversion. As shown in Table S1, the initial rate of product formation decreased upon higher conversion. This suggests the possibility of inhibition by one of the products of this transformation. On the basis of this observation, we used initial rates (monitoring the 1<sup>st</sup> 10% of the reaction progress) for all subsequent rate experiments.

**Table S1.** Rate versus percent conversion of the **4** to **2a** in NO<sub>2</sub>Ph-*d*<sub>5</sub> at 60 °C

| Conversion | Rate (M s <sup>-1</sup> ) |
|------------|---------------------------|
| 0-10%      | 2.20 x 10 <sup>-4</sup>   |
| 10-20%     | 1.91 x 10 <sup>-4</sup>   |
| 20-30%     | 1.66 x 10 <sup>-4</sup>   |
| 40-50%     | 1.64 x 10 <sup>-4</sup>   |
| 50-60%     | 1.31 x 10 <sup>-4</sup>   |
| 60-70%     | 1.11 x 10 <sup>-4</sup>   |
| 70-80%     | 1.16 x 10 <sup>-4</sup>   |
| 80-90%     | 1.18 x 10 <sup>-4</sup>   |
| 90-100%    | 1.34 x 10 <sup>-4</sup>   |

### Determining Order in Triflate with 4 at 50 °C in NO<sub>2</sub>Ph-d<sub>5</sub>

In a N<sub>2</sub>-filled drybox, complex **4** (14 mg, 0.0198 mmol, 1.0 equiv) and NBu<sub>4</sub>OTf (0.004 to 0.04 mmol, 0.01M to 0.1M) were combined in a screw-cap NMR tube and dissolved in dry NO<sub>2</sub>Ph-d<sub>5</sub> (0.4 mL). An internal standard (4-fluoroanisole) was added (50 μL of a stock solution in dry NO<sub>2</sub>Ph-d<sub>5</sub>, 0.0198 mmol, 1 equiv), and the tube was sealed with a Teflon®-lined cap. The tube was immediately placed in an NMR spectrometer with the temperature pre-equilibrated at 50 °C, and the reaction was allowed to equilibrate for three minutes. The rate of reductive elimination was studied using <sup>19</sup>F NMR spectroscopy by monitoring the appearance of the product signal. The reaction was followed to 10% conversion of **4** to 1-fluoro-4-benzotrifluoride (**2a**). The data was plotted as [**2a**] versus time and fit to a linear regression where m = initial rate. Each experiment was carried out in duplicate, and the initial rates reported in **Table S2** represent an average of two runs.

**Table S2.** Initial Rate as a Function of [NBu<sub>4</sub>OTf] at 50 °C.

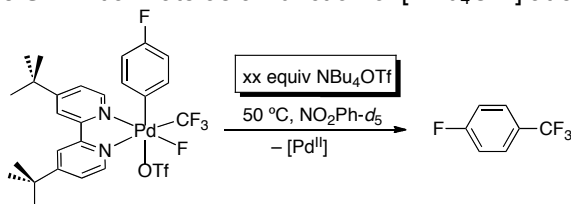

| equiv | [OTf] | 1/[OTf] | Initial rate (M s <sup>-1</sup> ) | Error in initial rate (M s <sup>-1</sup> ) |
|-------|-------|---------|-----------------------------------|--------------------------------------------|
| 0.20  | 0.01  | 100     | 2.91 x 10 <sup>-5</sup>           | ± 3.4 x 10 <sup>-7</sup>                   |
| 0.60  | 0.03  | 33.3    | 1.68 x 10 <sup>-5</sup>           | ± 4.4 x 10 <sup>-7</sup>                   |
| 1.0   | 0.05  | 20.0    | 1.35 x 10 <sup>-5</sup>           | ± 8.4 x 10 <sup>-8</sup>                   |
| 1.4   | 0.07  | 14.3    | 1.25 x 10 <sup>-5</sup>           | ± 9.1 x 10 <sup>-8</sup>                   |
| 2.0   | 0.1   | 10.0    | 1.18 x 10 <sup>-5</sup>           | ± 5.6 x 10 <sup>-8</sup>                   |

**Figure S3.** Representative Initial Rate Data (Reductive Elimination from **4** in the Presence of 0.07 M  $\text{NBu}_4\text{OTf}$ )

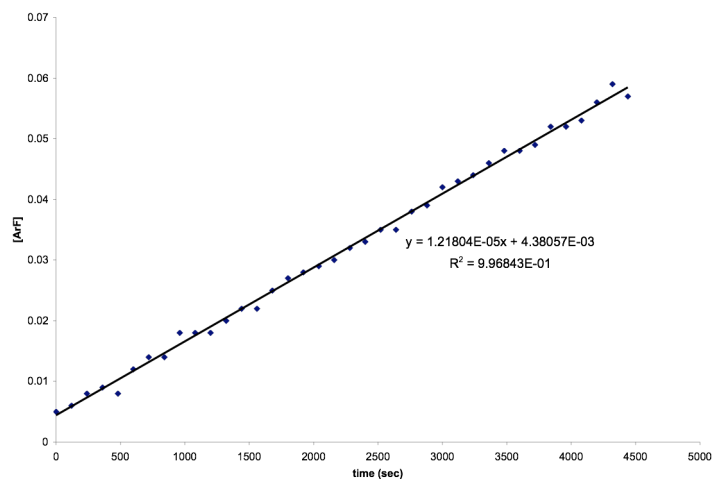

#### **Activation Parameters for Reductive Elimination from **4****

In a  $\text{N}_2$ -filled drybox, complex **4** (14 mg, 0.0198 mmol, 1.0 equiv) was added to a screw-cap NMR tube and dissolved in dry  $\text{NO}_2\text{Ph-}d_5$  (0.4 mL). An internal standard (4-fluoroanisole) was added (50  $\mu\text{L}$  of a stock solution in dry  $\text{NO}_2\text{Ph-}d_5$ , 0.0198 mmol, 1 equiv), and the tube was sealed with a Teflon<sup>®</sup>-lined cap. The tube was immediately placed in an NMR spectrometer with the temperature pre-equilibrated, and the reaction was allowed to equilibrate for three minutes. The rate of reductive elimination was studied using  $^{19}\text{F}$  NMR spectroscopy by monitoring the appearance of the product signal. The rate was followed to 10% conversion of **4** to 1-fluoro-4-benzotrifluoride (**2a**) at 30 °C, 40 °C, 50 °C and, 60 °C. The rate data reported in **Table S3** represent an average of two runs.

**Table S3.** Initial Rate as a Function of Temperature

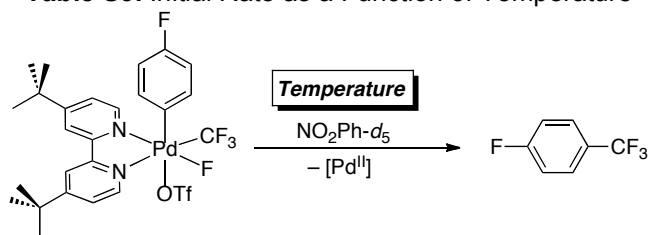

| Temperature (K) | Initial Rate ( $\text{M s}^{-1}$ ) | Error in initial rate ( $\text{M s}^{-1}$ ) | $\ln(k/T)$ | $1/T$  |
|-----------------|------------------------------------|---------------------------------------------|------------|--------|
| 303.2           | $1.15 \times 10^{-6}$              | $2.1 \times 10^{-8}$                        | -19.39     | 0.0033 |
| 313.2           | $5.15 \times 10^{-6}$              | $5.4 \times 10^{-8}$                        | -17.92     | 0.0032 |
| 323.2           | $2.21 \times 10^{-5}$              | $7.5 \times 10^{-7}$                        | -16.50     | 0.0031 |
| 333.2           | $9.59 \times 10^{-5}$              | $1.0 \times 10^{-6}$                        | -15.06     | 0.0030 |



**Figure S4.** Representative Initial Rate Data (Reductive Elimination from **4** at 50 °C)

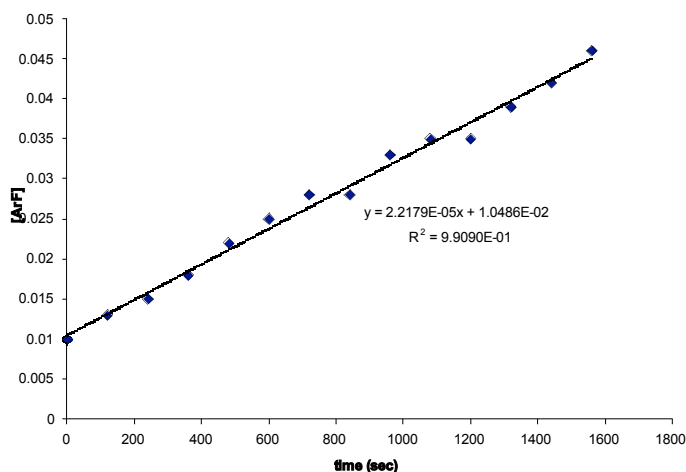

**Figure S5.** Eyring Plot for the Reductive Elimination of **4** in  $\text{NO}_2\text{Ph-}d_5$

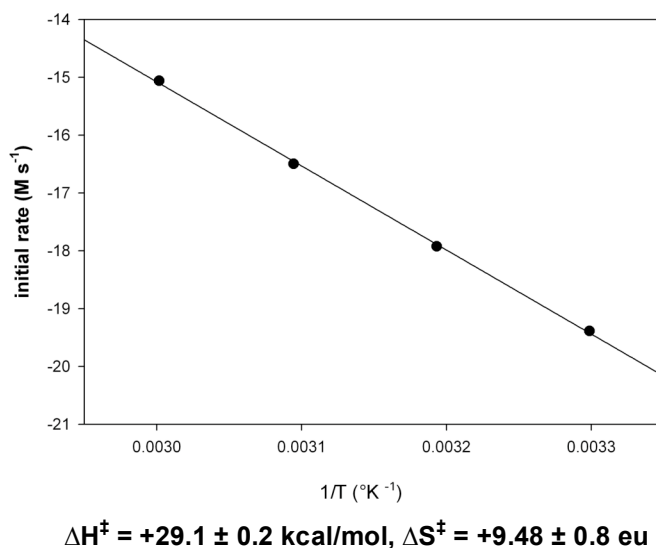

#### **Determining Initial Rate of Reductive Elimination from Complexes 5 and 6 at 50 °C in $\text{NO}_2\text{Ph-}d_5$**

In a  $\text{N}_2$ -filled drybox, complex **5** or **6** (14 mg, 1.0 equiv) was dissolved in dry  $\text{NO}_2\text{Ph-}d_5$  (0.4 mL). An internal standard (4-fluoroanisole) was added (50  $\mu\text{L}$  of a stock solution in dry  $\text{NO}_2\text{Ph-}d_5$ , 0.0198 mmol, 1 equiv), and the tube was sealed with a Teflon®-lined cap. The tube was immediately placed in an NMR spectrometer with the temperature pre-equilibrated at 50 °C, and the reaction was allowed to equilibrate for three minutes. The rate of reductive elimination was studied using  $^{19}\text{F}$  NMR spectroscopy by monitoring the appearance of the product signal. The reaction was followed to 10% conversion of  $\text{Pd}^{\text{IV}}$  complex to product. The data was plotted as [product] versus time and fit to a linear regression where m

= initial rate. Each experiment was carried out in duplicate, and the initial rates reported in **Table S4** represent an average of two runs.

**Table S4.** Initial Rate for Aryl-CF<sub>3</sub> Reductive Elimination from Complexes **5** and **6** at 50 °C in NO<sub>2</sub>Ph-d<sub>5</sub>

| Compound | Initial rate (M s <sup>-1</sup> ) | Error initial rate (M s <sup>-1</sup> ) |
|----------|-----------------------------------|-----------------------------------------|
| <b>5</b> | 4.58 x 10 <sup>-4</sup>           | 1.6 x 10 <sup>-5</sup>                  |
| <b>6</b> | 1.43 x 10 <sup>-5</sup>           | 2.0 x 10 <sup>-8</sup>                  |

**Figure S6.** Representative Initial Rate Data (Reductive Elimination from **5** at 50 °C in NO<sub>2</sub>Ph-d<sub>5</sub>)

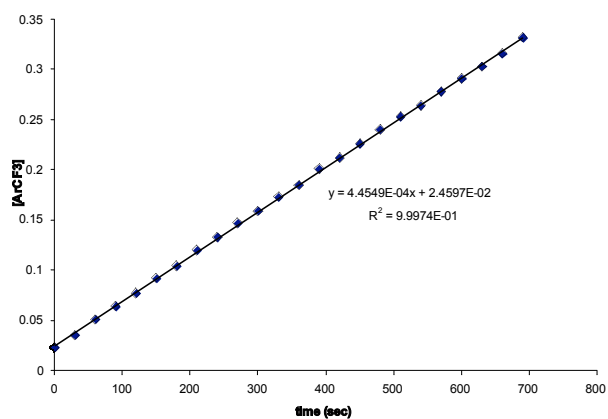

**Figure S7.** Representative Initial Rate Data (Reductive Elimination from **6** at 50 °C in NO<sub>2</sub>Ph-d<sub>5</sub>)

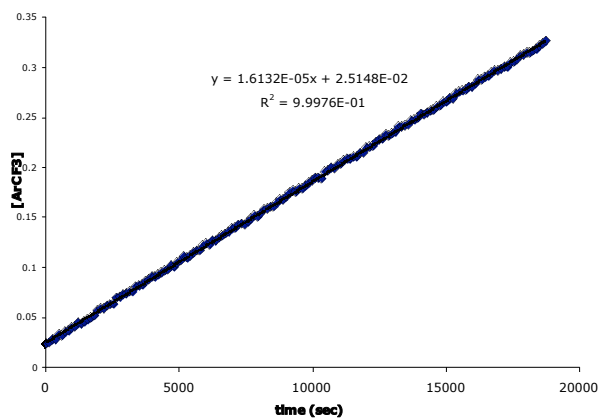

## Computational Methods

Using Gaussian 09 suite of programs,<sup>9</sup> all density functional theory (DFT) calculations were performed with the M06 functional<sup>10</sup> along with the Stevens (CEP-31G) valence basis sets with effective core potentials.<sup>11,12</sup> The CEP-31G basis set are triple- $\xi$  for Pd and double- $\xi$  for all main group elements. A d-polarization function (see 6-31G\*)<sup>13,14</sup> was added to all non-hydrogen main group elements:  $\xi_d = 0.8$  for carbon, nitrogen, oxygen, and fluorine and  $\xi_d = 0.65$  for sulfur (referred to as CEP-31G(d) level of theory). All geometries were optimized using CEP-31G(d)/M06 without symmetry constraints using the restricted Kohn-Sham formalism for all complexes. All minima were confirmed by the absence of imaginary frequencies and all transition states were verified by visual inspection of the single imaginary frequency vibration. Transition states for Ph-CF<sub>3</sub> and Ph-F reductive elimination from **8** and Ph-CF<sub>3</sub> reductive elimination from [(tmeda)Pd(Ph)(CF<sub>3</sub>)(F)]<sup>+</sup> were optimized along the reaction coordinate in each direction. Thermochemical data was calculated using unscaled vibrational frequencies and default parameters at 298.15 K and 1 atm. Solvent corrections were performed as single point calculations using the SMD model<sup>15</sup> with default settings. Single point energy calculations (using CEP-31G(d)/M06 optimized geometries) were performed to distinguish between Aryl-CF<sub>3</sub> versus Aryl-F reductive elimination transition states using the related triple- $\xi$  basis set for main group elements CEP-121G.<sup>11,12</sup> These calculations were also augmented with d-polarization function (f-polarization for Pd)<sup>16</sup> added to all atoms (see 6-311G\*\*++)<sup>13,14</sup>:  $\xi_d = 0.626$  for carbon,  $\xi_d = 0.913$  for nitrogen,  $\xi_d = 1.750$  for fluorine,  $\xi_s = 0.036$  for hydrogen, and  $\xi_f = 1.472$  for palladium and p-diffuse function were added to all main group elements:  $\xi_{sp} = 0.0438$  for carbon,  $\xi_{sp} = 0.0639$  for nitrogen,  $\xi_{sp} = 0.1076$  for fluorine and  $\xi_s = 0.036$  for hydrogen (referred to as CEP-121G(d,p)). NBO analysis<sup>17</sup> was used to determine relevant charge distribution in transition states. All rate constants for Hammett analysis are calculated using transition state theory based on gas phase  $\Delta H^\ddagger_{298}$  with the assumption of similar entropy components to all transition states at 298 K.

**Table S5.** Transition State and Solvent Correction Data

| Transition state     | Basis Set     | Gas/Solvent  | $\Delta\text{SCF}^\ddagger$ | $\Delta(\text{SCF}+\text{ZPE corr})^\ddagger$ | $\Delta\text{H}_{298}^\ddagger$ | $\Delta\text{G}_{298}^\ddagger$ |
|----------------------|---------------|--------------|-----------------------------|-----------------------------------------------|---------------------------------|---------------------------------|
| Aryl-CF <sub>3</sub> | CEP-31G(d)    | Gas          | 10.15                       | 9.93                                          | 9.41                            | 10.85                           |
| Aryl-F               | CEP-31G(d)    | Gas          | 11.62                       | 10.84                                         | 10.66                           | 10.91                           |
| Aryl-CF <sub>3</sub> | CEP-31G(d)    | Nitrobenzene | 13.69                       | 13.74                                         | 13.72                           | 13.55                           |
| Aryl-F               | CEP-31G(d)    | Nitrobenzene | 15.01                       | 14.48                                         | 14.75                           | 13.79                           |
| Aryl-CF <sub>3</sub> | CEP-121G(d,p) | Gas          | 9.41                        | 9.42                                          | 8.88                            | 10.17                           |
| Aryl-F               | CEP-121G(d,p) | Gas          | 11.87                       | 10.99                                         | 10.82                           | 11.03                           |
| Aryl-CF <sub>3</sub> | CEP-121G(d,p) | Nitrobenzene | 13.12                       | 13.39                                         | 12.76                           | 14.67                           |
| Aryl-F               | CEP-121G(d,p) | Nitrobenzene | 15.38                       | 14.77                                         | 14.47                           | 15.50                           |

$\Delta\text{SCF}^\ddagger$  = electronic transition state energy;  $\Delta(\text{SCF}+\text{ZPE corr})^\ddagger$  = zero point energy corrected electronic transition state energy;  $\Delta\text{H}_{298}^\ddagger$  = thermally corrected transition state enthalpy;  $\Delta\text{G}_{298}^\ddagger$  = thermally corrected transition state Gibbs energy. All energies are reported in kcal/mol.

**Table S6.** NBO Analysis Charges

| Complex                                                                              | Ipso-Ph | CF <sub>3</sub> carbon   |
|--------------------------------------------------------------------------------------|---------|--------------------------|
| [(bpy)Pd <sup>IV</sup> (Ph)(CF <sub>3</sub> )(F)] <sup>+</sup> intermediate          | +0.07   | +1.18                    |
| [(bpy)Pd <sup>IV</sup> (Ph)(CH <sub>3</sub> )(F)] <sup>+</sup> intermediate          | +0.06   | -0.58 (CH <sub>3</sub> ) |
| [(bpy)Pd <sup>IV</sup> (Ph)(CF <sub>3</sub> )(F)] <sup>+</sup> Ph-CF <sub>3</sub> ts | -0.11   | +1.24                    |

Calculations run using CEP-31G(d)/M06 in the gas phase.

**Table S7.** Electronic Substituent Analysis

| X                | $\Delta\text{SCF}^\ddagger$ | $\Delta(\text{SCF}+\text{ZPE corr})^\ddagger$ | $\Delta\text{H}_{298}^\ddagger$ | $\Delta\text{G}_{298}^\ddagger$ | $\sigma^+$ |
|------------------|-----------------------------|-----------------------------------------------|---------------------------------|---------------------------------|------------|
| NMe <sub>2</sub> | 7.08                        | 7.57                                          | 6.89                            | 9.05                            | -1.70      |
| NH <sub>2</sub>  | 7.82                        | 7.49                                          | 7.10                            | 8.03                            | -1.30      |
| OH               | 8.40                        | 8.11                                          | 7.70                            | 8.30                            | -0.92      |
| OMe              | 8.45                        | 8.26                                          | 7.86                            | 8.66                            | -0.78      |
| SMe              | 8.61                        | 8.05                                          | 7.79                            | 7.93                            | -0.60      |
| Me               | 9.74                        | 9.76                                          | 9.19                            | 10.95                           | -0.30      |
| F                | 9.06                        | 8.87                                          | 8.41                            | 9.46                            | -0.07      |
| H                | 10.15                       | 9.93                                          | 9.41                            | 10.85                           | 0          |
| CF <sub>3</sub>  | 9.78                        | 10.05                                         | 9.43                            | 11.73                           | 0.53       |
| CN               | 9.83                        | 9.72                                          | 9.23                            | 10.66                           | 0.71       |
| NO <sub>2</sub>  | 10.06                       | 9.63                                          | 9.23                            | 10.09                           | 0.78       |

$\Delta\text{SCF}^\ddagger$  = electronic transition state energy;  $\Delta(\text{SCF}+\text{ZPE corr})^\ddagger$  = zero point energy corrected electronic transition state energy;  $\Delta\text{H}_{298}^\ddagger$  = thermally corrected transition state enthalpy;  $\Delta\text{G}_{298}^\ddagger$  = thermally corrected transition state Gibbs energy. All energies are reported in kcal/mol.

**Figure S8.** Hammett Plot (versus  $\sigma^+$ ) for Aryl- $\text{CF}_3$  Reductive Elimination from  $[(\text{bpy})\text{Pd}^{\text{IV}}(\rho\text{-XC}_6\text{H}_4)(\text{CF}_3)(\text{F})]^+$

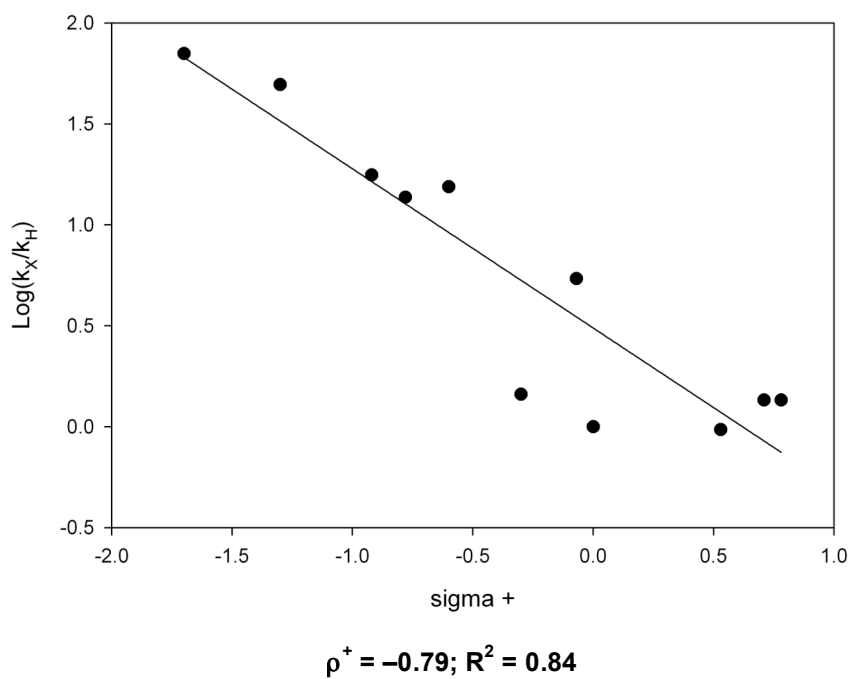

**Figure S9.** Hammett Plot (versus  $\sigma$ ) for Aryl- $\text{CF}_3$  Reductive Elimination from  $[(\text{bpy})\text{Pd}^{\text{IV}}(\rho\text{-XC}_6\text{H}_4)(\text{CF}_3)(\text{F})]^+$

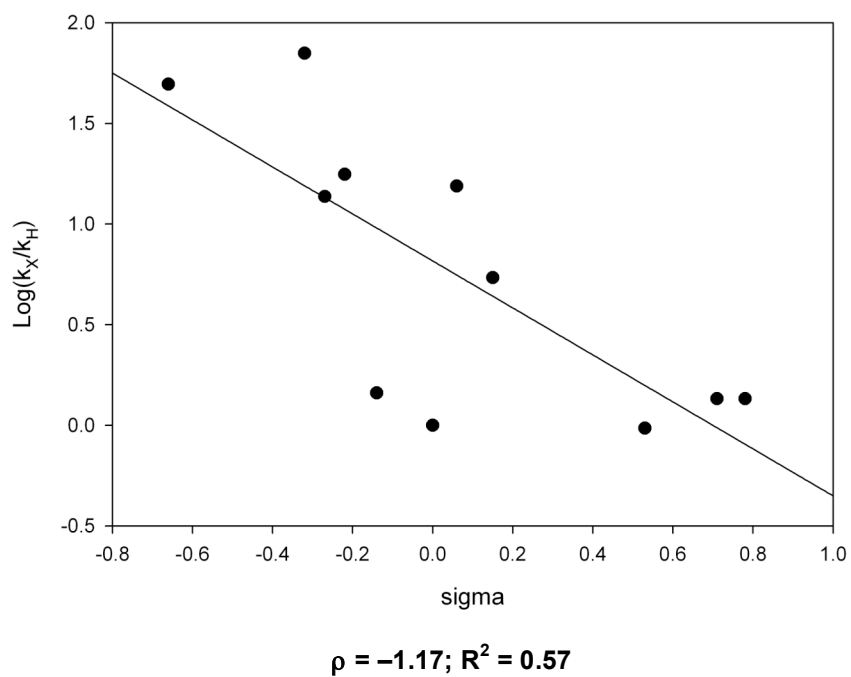

**Figure S10.** Hammett Plot (versus  $\sigma^-$ ) for Aryl- $\text{CF}_3$  Reductive Elimination from  $[(\text{bpy})\text{Pd}^{\text{IV}}(\text{p-}\text{XC}_6\text{H}_4)(\text{CF}_3)(\text{F})]^+$

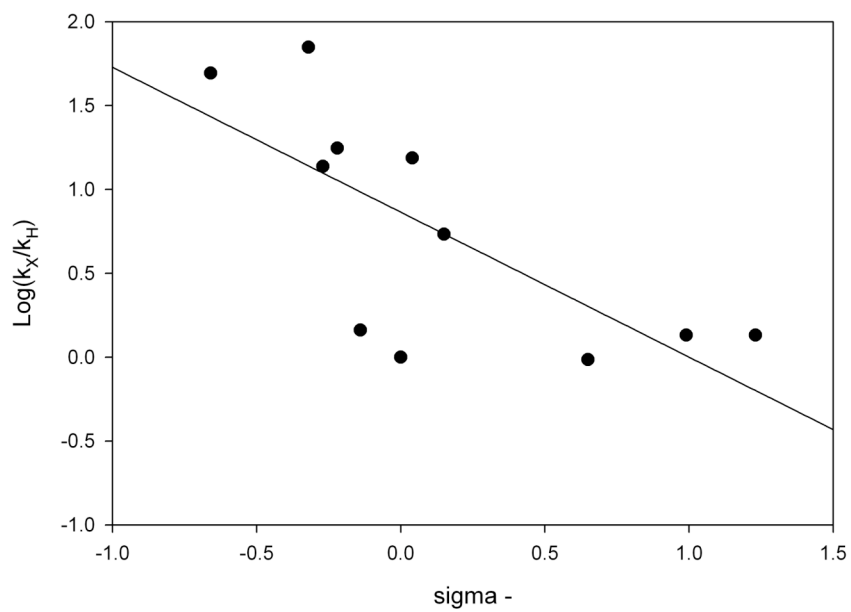

$\rho^- = -0.86 ; R^2 = 0.52$

### Calculations – Optimized Atomic Coordinates

Complex formulas along with element symbol followed by x, y, z Cartesian coordinates (Å). Complexes are tabulated in the order that the complexes appear in the paper.

[Pd(bpy)(C<sub>6</sub>H<sub>5</sub>)(CF<sub>3</sub>)(F)(OTf)]

|    |             |             |             |
|----|-------------|-------------|-------------|
| Pd | -0.65671900 | -0.57900800 | -0.34736500 |
| C  | -2.66727700 | -0.19917500 | -0.28954000 |
| C  | -3.35603400 | -0.24579700 | -1.51922500 |
| C  | -3.30110400 | 0.16403200  | 0.91798300  |
| C  | -4.73465100 | 0.08857500  | -1.53041300 |
| H  | -2.83499000 | -0.55174100 | -2.43121900 |
| C  | -4.68163800 | 0.49343200  | 0.88248600  |
| H  | -2.77122100 | 0.17344900  | 1.87638200  |
| C  | -5.39715800 | 0.45997500  | -0.33663600 |
| H  | -5.28300300 | 0.05015300  | -2.47916500 |
| H  | -5.18753100 | 0.76787200  | 1.81593300  |
| C  | -0.09132200 | -0.50882100 | 2.65486800  |
| C  | -0.06615900 | 1.57440100  | 1.55877500  |
| C  | 0.29937900  | 0.07270900  | 3.87781500  |
| H  | -0.24477000 | -1.58752900 | 2.56197900  |
| C  | 0.29079700  | 2.22849400  | 2.75795600  |
| C  | 0.47237600  | 1.47218300  | 3.93169900  |
| H  | 0.46354400  | -0.56586300 | 4.74943200  |
| H  | 0.46846200  | 3.30738400  | 2.75987600  |
| H  | 0.76839100  | 1.96402800  | 4.86382300  |
| C  | -0.30246100 | 1.96157600  | -2.07722100 |
| C  | -0.12152500 | 2.28559200  | 0.24827400  |
| C  | -0.06581400 | 3.33081400  | -2.33266000 |
| H  | -0.45011800 | 1.20979500  | -2.86450200 |
| C  | 0.12092600  | 3.66691400  | 0.08077000  |
| C  | 0.14442500  | 4.18893500  | -1.23169100 |
| H  | -0.03238900 | 3.69950200  | -3.36112500 |
| H  | 0.30459200  | 4.31965000  | 0.93943200  |
| H  | 0.34048100  | 5.25465600  | -1.38999400 |
| C  | -1.09729500 | -2.53527300 | 0.14138200  |
| F  | -1.77458300 | -2.61923800 | 1.31946900  |
| F  | 0.03204600  | -3.23220300 | 0.29706400  |
| F  | -1.84334400 | -3.13815800 | -0.77899400 |
| F  | -0.78702300 | -1.08208400 | -2.22653900 |
| O  | 1.55596100  | -0.98157700 | -0.37796900 |
| S  | 2.55479800  | 0.14573100  | -0.34667500 |
| O  | 2.62763100  | 0.81673000  | 0.96097500  |
| O  | 2.53269100  | 1.01050900  | -1.52827600 |
| C  | 4.14638100  | -0.82648700 | -0.47706300 |
| F  | 4.18231700  | -1.52700100 | -1.61107600 |
| F  | 5.18486100  | 0.01810500  | -0.46236500 |
| F  | 4.27014100  | -1.66852100 | 0.55445900  |
| N  | -0.33141400 | 1.48633400  | -0.82425500 |
| N  | -0.29821000 | 0.22652600  | 1.54252200  |
| H  | -6.46282400 | 0.71542200  | -0.35448700 |

#### [Pd(bpy)(C<sub>6</sub>H<sub>5</sub>)(CF<sub>3</sub>)F]<sup>+</sup> intermediate

|    |             |             |             |
|----|-------------|-------------|-------------|
| Pd | -0.38557800 | 0.02778500  | -0.81707600 |
| C  | 1.52717000  | -2.39595700 | -1.14119500 |
| C  | 2.44289100  | -0.51188000 | -0.05698600 |
| C  | 2.73187000  | -3.12232400 | -0.99440700 |
| H  | 0.63372800  | -2.80339500 | -1.63322600 |
| C  | 3.67968400  | -1.17013400 | 0.13091000  |
| C  | 3.81866800  | -2.49363600 | -0.34783500 |
| H  | 2.80629900  | -4.14352800 | -1.37700100 |
| H  | 4.51598100  | -0.67802100 | 0.63662700  |
| H  | 4.76716200  | -3.02348600 | -0.21422400 |
| C  | 0.57106200  | 2.62431200  | 0.56408300  |
| C  | 2.15898800  | 0.88544600  | 0.39317800  |
| C  | 1.50501200  | 3.48682500  | 1.17553500  |
| H  | -0.45649500 | 2.94911200  | 0.37846100  |

|   |             |             |             |
|---|-------------|-------------|-------------|
| C | 3.14163300  | 1.69748300  | 1.00275300  |
| C | 2.81399500  | 3.01166800  | 1.40032200  |
| H | 1.19867700  | 4.49625000  | 1.46113900  |
| H | 4.15259000  | 1.30963800  | 1.15757100  |
| H | 3.56824300  | 3.64938500  | 1.87150900  |
| C | -1.31695900 | -0.76204800 | 0.85090500  |
| C | -0.72461800 | -0.51901500 | 2.09964900  |
| C | -2.46455400 | -1.52799800 | 0.60634300  |
| C | -1.36722300 | -1.12012300 | 3.21727100  |
| H | 0.17122300  | 0.09055100  | 2.24328600  |
| C | -3.07312700 | -2.10378200 | 1.75536800  |
| H | -2.86490500 | -1.68418500 | -0.39837300 |
| C | -2.53121800 | -1.90283100 | 3.04578300  |
| H | -0.94095800 | -0.95870900 | 4.21386500  |
| H | -3.97458100 | -2.71039300 | 1.61491800  |
| H | -3.01620500 | -2.35567300 | 3.91664600  |
| C | -2.00898000 | 1.26004800  | -1.06687000 |
| F | -1.22437300 | -1.31108500 | -1.93600800 |
| F | -3.08995400 | 0.65078500  | -1.52033500 |
| F | -2.34982900 | 1.94533500  | 0.04218800  |
| F | -1.59423700 | 2.15709300  | -1.98631900 |
| N | 0.88616800  | 1.36367200  | 0.18452500  |
| N | 1.41034700  | -1.13669300 | -0.68313300 |

[OTf]<sup>-</sup>

|   |             |             |             |
|---|-------------|-------------|-------------|
| O | -1.24327900 | -0.83281900 | -1.17477400 |
| S | -0.93688400 | -0.00001500 | -0.00006600 |
| O | -1.24345800 | -0.60094100 | 1.30852000  |
| O | -1.24298300 | 1.43379900  | -0.13401800 |
| C | 0.94594400  | -0.00017900 | 0.00001400  |
| F | 1.45030200  | 0.51978900  | -1.13921400 |
| F | 1.44963100  | 0.72692500  | 1.01992200  |
| F | 1.45031500  | -1.24660300 | 0.11964200  |

[Pd(bpy)(C<sub>6</sub>H<sub>5</sub>)(CF<sub>3</sub>)F]<sup>+</sup> transition state Ar-CF<sub>3</sub>

|    |             |             |             |
|----|-------------|-------------|-------------|
| Pd | -0.11014700 | -0.46962200 | -0.33367800 |
| C  | 2.09787900  | -2.50969300 | -0.08351500 |
| C  | 2.72251000  | -0.27256100 | 0.37589600  |
| C  | 3.38728000  | -2.98013900 | 0.25534000  |
| H  | 1.27347300  | -3.15710200 | -0.41093400 |
| C  | 4.02750100  | -0.67206000 | 0.73724500  |
| C  | 4.35854300  | -2.04542600 | 0.67554200  |
| H  | 3.60895600  | -4.04855700 | 0.19327500  |
| H  | 4.76885100  | 0.06228300  | 1.06675700  |
| H  | 5.36368600  | -2.37666700 | 0.95476000  |
| C  | 0.44474500  | 2.57950000  | -0.09925800 |
| C  | 2.24396800  | 1.13660300  | 0.35091500  |
| C  | 1.24211800  | 3.72403300  | 0.10858400  |
| H  | -0.60350600 | 2.67952100  | -0.40055900 |
| C  | 3.09893700  | 2.23572700  | 0.59178000  |
| C  | 2.59294700  | 3.54710200  | 0.47793400  |
| H  | 0.80320800  | 4.71662000  | -0.02104400 |
| H  | 4.14964600  | 2.06785200  | 0.84611400  |
| H  | 3.24332100  | 4.40847800  | 0.65784200  |
| C  | -2.05971200 | -0.17180400 | 0.45838700  |
| C  | -2.88819100 | -1.31238000 | 0.49660000  |
| C  | -2.14719800 | 0.88275900  | 1.39453000  |
| C  | -3.83218500 | -1.39911600 | 1.54926300  |
| H  | -2.79494100 | -2.10726700 | -0.24655900 |
| C  | -3.09085200 | 0.76325600  | 2.44255300  |
| H  | -1.51949100 | 1.77682300  | 1.34010600  |
| C  | -3.93391600 | -0.37185600 | 2.51700100  |
| H  | -4.48280200 | -2.27859800 | 1.60052400  |
| H  | -3.16689600 | 1.56403500  | 3.18597200  |
| H  | -4.67150300 | -0.45218000 | 3.32235700  |
| C  | -1.78486400 | 0.42959400  | -1.56778400 |
| F  | -0.65719400 | -2.26941300 | -0.83552900 |
| F  | -2.64136800 | -0.41905600 | -2.09216500 |



|   |             |             |             |
|---|-------------|-------------|-------------|
| F | -2.38147800 | 1.60342600  | -1.32556900 |
| F | -0.85612300 | 0.69688100  | -2.51925500 |
| N | 0.91946200  | 1.32033800  | 0.03746400  |
| N | 1.80099000  | -1.19753500 | -0.01929700 |

[Pd(bpy)(C<sub>6</sub>H<sub>5</sub>)(CF<sub>3</sub>)F]<sup>+</sup> transition state Ar-F

|    |             |             |             |
|----|-------------|-------------|-------------|
| Pd | -0.28555600 | 0.12941600  | -0.68415500 |
| C  | 1.42526700  | -2.45390800 | -1.09618400 |
| C  | 2.48906300  | -0.67480100 | 0.02433500  |
| C  | 2.61311000  | -3.21914300 | -1.11566900 |
| H  | 0.48247000  | -2.80925100 | -1.53382500 |
| C  | 3.71764600  | -1.37588000 | 0.04469400  |
| C  | 3.77422400  | -2.66461700 | -0.53250300 |
| H  | 2.61983000  | -4.21038600 | -1.57644800 |
| H  | 4.61686700  | -0.93491500 | 0.48481900  |
| H  | 4.71535100  | -3.22358600 | -0.53042100 |
| C  | 0.83867300  | 2.51094400  | 0.93323900  |
| C  | 2.30110100  | 0.69451500  | 0.59721700  |
| C  | 1.81396600  | 3.23193800  | 1.65365100  |
| H  | -0.15956400 | 2.92893300  | 0.77516000  |
| C  | 3.32607100  | 1.36344100  | 1.30399400  |
| C  | 3.08473400  | 2.64828200  | 1.83522400  |
| H  | 1.56869100  | 4.22032500  | 2.05018200  |
| H  | 4.29998200  | 0.88674400  | 1.44727200  |
| H  | 3.87262300  | 3.17525300  | 2.38216800  |
| C  | -1.82123100 | -1.01096700 | 0.45910900  |
| C  | -3.17094900 | -0.66976000 | 0.39819900  |
| C  | -1.16707000 | -1.83644700 | 1.37581400  |
| C  | -3.93018000 | -1.08999900 | 1.52296700  |
| H  | -3.61777400 | -0.13025100 | -0.43920900 |
| C  | -1.97653300 | -2.23196700 | 2.47946100  |
| H  | -0.11586000 | -2.12396000 | 1.30417800  |
| C  | -3.33954000 | -1.86429600 | 2.55123100  |
| H  | -4.99345600 | -0.82891700 | 1.55577800  |
| H  | -1.51476400 | -2.83661900 | 3.26797100  |
| H  | -3.94758300 | -2.19719700 | 3.39821000  |
| C  | -1.56844300 | 1.64839700  | -1.13340600 |
| F  | -1.40690900 | -1.26159000 | -1.56069500 |
| F  | -2.55284300 | 1.28557100  | -1.95593000 |
| F  | -2.13157200 | 2.24165800  | -0.05643500 |
| F  | -0.83407000 | 2.58984800  | -1.76462600 |
| N  | 1.07417800  | 1.28582900  | 0.40952900  |
| N  | 1.37980300  | -1.22912500 | -0.53578600 |

[Pd(bpy)(C<sub>6</sub>H<sub>4</sub>NH<sub>2</sub>)(CF<sub>3</sub>)F]<sup>+</sup> intermediate

|    |             |             |             |
|----|-------------|-------------|-------------|
| Pd | -0.03065900 | -0.47313800 | -0.87725200 |
| C  | -1.30506300 | 2.22270000  | -1.74485100 |
| C  | -2.35300800 | 1.13681400  | 0.07009700  |
| C  | -2.22177500 | 3.29855400  | -1.69190300 |
| H  | -0.49757000 | 2.16515900  | -2.47933100 |
| C  | -3.30667100 | 2.17617700  | 0.18839600  |
| C  | -3.23448700 | 3.26982900  | -0.70605900 |
| H  | -2.13668400 | 4.12265700  | -2.40171400 |
| H  | -4.08578300 | 2.14764900  | 0.95029700  |
| H  | -3.96023600 | 4.08307900  | -0.63146400 |
| C  | -1.22705200 | -2.10910800 | 1.46618500  |
| C  | -2.32263300 | -0.08297200 | 0.93865500  |
| C  | -2.17342900 | -2.42176200 | 2.46531400  |
| H  | -0.39112900 | -2.77381100 | 1.26026800  |
| C  | -3.30083300 | -0.33566200 | 1.92915200  |
| C  | -3.22928300 | -1.51500300 | 2.70200000  |
| H  | -2.07080600 | -3.34985500 | 3.02921900  |
| H  | -4.11418100 | 0.37140300  | 2.09034000  |
| H  | -3.98316400 | -1.71857800 | 3.46589300  |
| C  | 1.47376900  | 0.43330300  | 0.22892400  |
| C  | 1.28011300  | 0.64851100  | 1.60302000  |
| C  | 2.62909500  | 0.80408700  | -0.47867100 |
| C  | 2.31652100  | 1.30775000  | 2.30954400  |

|   |             |             |             |
|---|-------------|-------------|-------------|
| H | 0.38676000  | 0.33755100  | 2.14093400  |
| C | 3.64915600  | 1.45833300  | 0.25196200  |
| H | 2.74531900  | 0.60650000  | -1.54226800 |
| C | 3.51352200  | 1.71879900  | 1.64957900  |
| H | 2.18208900  | 1.49799400  | 3.37848000  |
| H | 4.55408200  | 1.76608900  | -0.28026400 |
| C | 1.09711900  | -2.17784500 | -0.98153400 |
| F | 0.76591300  | 0.12429900  | -2.52865600 |
| F | 2.19205200  | -2.07623100 | -1.74448100 |
| F | 1.48568000  | -2.68678600 | 0.22553100  |
| F | 0.26234100  | -3.10378800 | -1.55066700 |
| N | -1.29602000 | -0.97617100 | 0.72549300  |
| N | -1.38419100 | 1.18934900  | -0.88424300 |
| N | 4.50331400  | 2.42614500  | 2.34183600  |
| H | 4.52323000  | 2.30131400  | 3.35216400  |
| H | 5.43241500  | 2.41947300  | 1.92506500  |

[Pd(bpy)(C<sub>6</sub>H<sub>4</sub>NH<sub>2</sub>)(CF<sub>3</sub>)F]<sup>+</sup> transition state

|    |             |             |             |
|----|-------------|-------------|-------------|
| Pd | -0.12901300 | -0.49480100 | 0.34689800  |
| C  | -2.37553600 | -2.50152900 | -0.13217800 |
| C  | -2.90038200 | -0.25035300 | -0.63210800 |
| C  | -3.62536900 | -2.94695600 | -0.62045800 |
| H  | -1.61400100 | -3.17193400 | 0.27430700  |
| C  | -4.16444600 | -0.62346300 | -1.14709400 |
| C  | -4.52748000 | -1.99028200 | -1.13954500 |
| H  | -3.87021600 | -4.00971400 | -0.59328700 |
| H  | -4.85064600 | 0.12183500  | -1.54995600 |
| H  | -5.49859600 | -2.29855900 | -1.53391100 |
| C  | -0.64611200 | 2.56758300  | 0.12903300  |
| C  | -2.40351000 | 1.15394600  | -0.53621000 |
| C  | -1.40323400 | 3.72709800  | -0.13910600 |
| H  | 0.35552100  | 2.65063400  | 0.54769000  |
| C  | -3.21464700 | 2.27279800  | -0.84422900 |
| C  | -2.70970300 | 3.57603900  | -0.65380800 |
| H  | -0.97056800 | 4.70880400  | 0.05852900  |
| H  | -4.23243800 | 2.12861500  | -1.20613200 |
| H  | -3.32806700 | 4.44692500  | -0.88258100 |
| C  | 1.88568800  | -0.14524900 | -0.11802900 |
| C  | 2.76979000  | -1.25262700 | -0.03026800 |
| C  | 2.19538700  | 0.96926500  | -0.94116200 |
| C  | 3.92900100  | -1.27220200 | -0.82339100 |
| H  | 2.54630800  | -2.09000900 | 0.62701300  |
| C  | 3.35017200  | 0.94131000  | -1.74230400 |
| H  | 1.55323900  | 1.84588200  | -1.00331000 |
| C  | 4.24315700  | -0.17902400 | -1.69445800 |
| H  | 4.59405000  | -2.13891900 | -0.77203900 |
| H  | 3.56229700  | 1.78363400  | -2.40686300 |
| C  | 1.27148600  | 0.34687700  | 1.91830100  |
| F  | 0.36317400  | -2.31245100 | 0.81929500  |
| F  | 2.04972300  | -0.53444300 | 2.54862400  |
| F  | 1.89325000  | 1.55363100  | 1.86649700  |
| F  | 0.18537200  | 0.55961000  | 2.73604800  |
| N  | -1.11358100 | 1.31501500  | -0.08570100 |
| N  | -2.04494400 | -1.19377300 | -0.14287000 |
| N  | 5.36420900  | -0.22175700 | -2.50480600 |
| H  | 5.69289600  | 0.64003000  | -2.93332700 |
| H  | 6.08580600  | -0.90930000 | -2.30187800 |

[Pd(bpy)(C<sub>6</sub>H<sub>4</sub>NMe<sub>2</sub>)(CF<sub>3</sub>)F]<sup>+</sup> intermediate

|    |             |             |             |
|----|-------------|-------------|-------------|
| Pd | -0.78882800 | -0.74045000 | -0.73998500 |
| C  | -1.44469400 | 1.89969500  | -2.23883500 |
| C  | -2.29694900 | 1.73526000  | -0.04409800 |
| C  | -1.99513500 | 3.19174000  | -2.40658500 |
| H  | -0.87724500 | 1.38846000  | -3.02086800 |
| C  | -2.87612800 | 3.02399300  | -0.13340300 |
| C  | -2.71871500 | 3.75794000  | -1.33235000 |
| H  | -1.85688600 | 3.72527800  | -3.34811600 |
| H  | -3.43338500 | 3.45456900  | 0.69868600  |

|   |             |             |             |
|---|-------------|-------------|-------------|
| H | -3.15725700 | 4.75458200  | -1.42216600 |
| C | -1.79998300 | -1.21219000 | 2.15054700  |
| C | -2.39802100 | 0.84640500  | 1.15750700  |
| C | -2.53240600 | -0.92013400 | 3.32098300  |
| H | -1.24828200 | -2.14515400 | 2.05598500  |
| C | -3.14730500 | 1.20055100  | 2.30428400  |
| C | -3.21772600 | 0.31157400  | 3.39882900  |
| H | -2.55425200 | -1.64637500 | 4.13461100  |
| H | -3.67737700 | 2.15190400  | 2.34103600  |
| H | -3.79700200 | 0.57650200  | 4.28627700  |
| C | 1.12362900  | -0.12526200 | -0.20833600 |
| C | 1.32666500  | 0.49791300  | 1.03224000  |
| C | 2.14217800  | -0.37767000 | -1.14007300 |
| C | 2.63985600  | 0.92837600  | 1.34128300  |
| H | 0.53429300  | 0.66263300  | 1.75970900  |
| C | 3.44633800  | 0.05675300  | -0.80934000 |
| H | 1.95068200  | -0.88134900 | -2.08527600 |
| C | 3.73346700  | 0.72594100  | 0.43068700  |
| H | 2.79281800  | 1.41708600  | 2.30323400  |
| H | 4.23378500  | -0.13763700 | -1.53704900 |
| C | -0.23399800 | -2.68539200 | -0.43913800 |
| F | -0.26357200 | -0.89161200 | -2.59062800 |
| F | 0.60867900  | -3.17641200 | -1.35603300 |
| F | 0.30126100  | -2.94769800 | 0.79055900  |
| F | -1.40720400 | -3.39237900 | -0.51677600 |
| N | -1.73272400 | -0.35797300 | 1.10042100  |
| N | -1.59993900 | 1.21382900  | -1.08994600 |
| N | 5.01173100  | 1.16167200  | 0.73288900  |
| C | 5.29471200  | 1.72447900  | 2.05912600  |
| H | 4.68922200  | 2.62962900  | 2.24635100  |
| H | 5.09732300  | 0.99754500  | 2.87087900  |
| H | 6.35235500  | 2.01550000  | 2.11012600  |
| C | 6.12747600  | 0.82333100  | -0.16205700 |
| H | 6.26851100  | -0.27061000 | -0.25476400 |
| H | 5.96907800  | 1.24184400  | -1.17174300 |
| H | 7.05419400  | 1.25668200  | 0.23711200  |

[Pd(bpy)(C<sub>6</sub>H<sub>4</sub>NMe<sub>2</sub>)(CF<sub>3</sub>)F]<sup>+</sup> transition state

|    |             |             |             |
|----|-------------|-------------|-------------|
| Pd | -0.60431200 | -0.53209300 | 0.34056400  |
| C  | -2.80650600 | -2.47516000 | -0.51958600 |
| C  | -3.24904400 | -0.19190900 | -0.93818700 |
| C  | -3.98949100 | -2.87194200 | -1.18420800 |
| H  | -2.10519600 | -3.18088000 | -0.06709300 |
| C  | -4.44186400 | -0.51360100 | -1.62904700 |
| C  | -4.81323100 | -1.87246200 | -1.75114700 |
| H  | -4.24407000 | -3.93059400 | -1.25255200 |
| H  | -5.06671600 | 0.26488200  | -2.06741000 |
| H  | -5.72989700 | -2.14193200 | -2.28101300 |
| C  | -1.09712400 | 2.54616100  | 0.27700600  |
| C  | -2.76120000 | 1.19726100  | -0.69055200 |
| C  | -1.81428800 | 3.72838700  | -0.00106600 |
| H  | -0.15480100 | 2.59123500  | 0.82011400  |
| C  | -3.52714800 | 2.34235500  | -1.01865200 |
| C  | -3.04802500 | 3.62505800  | -0.68069300 |
| H  | -1.40810600 | 4.69020900  | 0.31507400  |
| H  | -4.49361200 | 2.23208500  | -1.50997500 |
| H  | -3.63292400 | 4.51510700  | -0.92335600 |
| C  | 1.43900300  | -0.15040100 | 0.25365800  |
| C  | 2.32693700  | -1.24278200 | 0.44815100  |
| C  | 1.88952400  | 1.02265600  | -0.40996000 |
| C  | 3.62133300  | -1.19508600 | -0.08938300 |
| H  | 2.00037300  | -2.12871400 | 0.98838100  |
| C  | 3.18013800  | 1.06800900  | -0.96053900 |
| H  | 1.24960400  | 1.89143900  | -0.55472200 |
| C  | 4.09218500  | -0.04158900 | -0.81647800 |
| H  | 4.26589500  | -2.06107600 | 0.05700900  |
| H  | 3.47469300  | 1.96461000  | -1.50512900 |
| C  | 0.45376100  | 0.17953200  | 2.21304300  |
| F  | -0.17075500 | -2.38810200 | 0.71029600  |

|   |             |             |             |
|---|-------------|-------------|-------------|
| F | 1.10582900  | -0.76299900 | 2.89768700  |
| F | 1.07942000  | 1.37503500  | 2.37269500  |
| F | -0.76083400 | 0.34428900  | 2.83689900  |
| N | -1.53469500 | 1.31510800  | -0.07852000 |
| N | -2.46705000 | -1.17450400 | -0.40660100 |
| N | 5.35860900  | 0.00125000  | -1.34681700 |
| C | 6.27861500  | -1.13373500 | -1.15809700 |
| H | 6.49911300  | -1.30239500 | -0.08865800 |
| H | 5.85702900  | -2.06204700 | -1.58165600 |
| H | 7.22349700  | -0.92186200 | -1.67473700 |
| C | 5.83134000  | 1.20918800  | -2.04221600 |
| H | 5.20062000  | 1.43782300  | -2.91972400 |
| H | 5.83524400  | 2.08742200  | -1.37146800 |
| H | 6.85713600  | 1.04434000  | -2.39593200 |

[Pd(bpy)(C<sub>6</sub>H<sub>4</sub>OMe)(CF<sub>3</sub>)F]<sup>+</sup> intermediate

|    |             |             |             |
|----|-------------|-------------|-------------|
| Pd | -0.43061300 | -0.59384100 | -0.83999700 |
| C  | -1.22557700 | 2.20545000  | -1.91872800 |
| C  | -2.29225500 | 1.54340500  | 0.08076300  |
| C  | -1.91185200 | 3.44203300  | -1.93118600 |
| H  | -0.51362600 | 1.91094000  | -2.69406700 |
| C  | -3.01561100 | 2.75874500  | 0.13966400  |
| C  | -2.81796100 | 3.71744400  | -0.88167800 |
| H  | -1.73611000 | 4.15497600  | -2.73805100 |
| H  | -3.71320100 | 2.96537500  | 0.95148400  |
| H  | -3.36593800 | 4.66223700  | -0.85477000 |
| C  | -1.67175400 | -1.69506700 | 1.77813900  |
| C  | -2.41173600 | 0.43994600  | 1.08652100  |
| C  | -2.55200800 | -1.70005300 | 2.88131600  |
| H  | -1.00227300 | -2.53292900 | 1.59582200  |
| C  | -3.31415200 | 0.49744000  | 2.17445100  |
| C  | -3.38810800 | -0.58071400 | 3.08319200  |
| H  | -2.56764800 | -2.56155700 | 3.55023800  |
| H  | -3.95657000 | 1.36737400  | 2.30802300  |
| H  | -4.08382000 | -0.54419500 | 3.92457100  |
| C  | 1.32893800  | 0.07746600  | 0.02879200  |
| C  | 1.29667100  | 0.54543800  | 1.35611400  |
| C  | 2.46852400  | 0.06209600  | -0.78414900 |
| C  | 2.50884000  | 1.03570100  | 1.89284900  |
| H  | 0.40162900  | 0.54110200  | 1.97454000  |
| C  | 3.67754800  | 0.55579400  | -0.22302500 |
| H  | 2.44296000  | -0.30558900 | -1.80785000 |
| C  | 3.70283900  | 1.04262900  | 1.11395100  |
| H  | 2.54142000  | 1.40880200  | 2.91898200  |
| H  | 4.57182200  | 0.54620700  | -0.84641900 |
| C  | 0.30203400  | -2.50516600 | -0.83811800 |
| F  | 0.30764300  | -0.34092500 | -2.60272500 |
| F  | 1.29340400  | -2.72439400 | -1.71048700 |
| F  | 0.71881300  | -2.96393100 | 0.37813400  |
| F  | -0.77062500 | -3.27422600 | -1.20701200 |
| N  | -1.60189100 | -0.65980400 | 0.90602000  |
| N  | -1.42174000 | 1.30329800  | -0.93752800 |
| O  | 4.80662500  | 1.53442600  | 1.74237500  |
| C  | 6.05371100  | 1.55117100  | 1.01947800  |
| H  | 6.79225500  | 1.97188000  | 1.71350200  |
| H  | 6.35626600  | 0.52905500  | 0.73135900  |
| H  | 5.98177300  | 2.19187600  | 0.12280300  |

[Pd(bpy)(C<sub>6</sub>H<sub>4</sub>OMe)(CF<sub>3</sub>)F]<sup>+</sup> transition state

|    |             |             |             |
|----|-------------|-------------|-------------|
| Pd | -0.36955500 | -0.39942400 | 0.50659900  |
| C  | -2.38126700 | -2.63002500 | 0.03397900  |
| C  | -3.00571300 | -0.50320600 | -0.79490000 |
| C  | -3.53414100 | -3.23209700 | -0.52029100 |
| H  | -1.62559600 | -3.18242800 | 0.59814700  |
| C  | -4.17409200 | -1.03933400 | -1.38564100 |
| C  | -4.43768100 | -2.42167500 | -1.24468100 |
| H  | -3.70484300 | -4.30101400 | -0.38471100 |
| H  | -4.86291000 | -0.40587600 | -1.94492300 |

|   |             |             |             |
|---|-------------|-------------|-------------|
| H | -5.33466100 | -2.85410800 | -1.69416500 |
| C | -1.06733000 | 2.56315800  | -0.13612500 |
| C | -2.62560100 | 0.93973900  | -0.82076900 |
| C | -1.86393900 | 3.61634200  | -0.63257700 |
| H | -0.13267800 | 2.77695500  | 0.37999300  |
| C | -3.46679700 | 1.94306500  | -1.35882600 |
| C | -3.08107700 | 3.29745000  | -1.27396800 |
| H | -1.52847700 | 4.64714800  | -0.51052000 |
| H | -4.41747100 | 1.67335100  | -1.81844300 |
| H | -3.72384900 | 4.08113800  | -1.68116500 |
| C | 1.66851100  | 0.04357500  | 0.15956100  |
| C | 2.58535900  | -1.00112000 | 0.41445000  |
| C | 1.95438700  | 1.06891800  | -0.78064900 |
| C | 3.78789100  | -1.06146900 | -0.32455900 |
| H | 2.36591900  | -1.76419000 | 1.15806200  |
| C | 3.14556400  | 1.00117400  | -1.52162500 |
| H | 1.27742400  | 1.90032200  | -0.96662800 |
| C | 4.07570600  | -0.06175400 | -1.30009100 |
| H | 4.47870600  | -1.88149800 | -0.12834900 |
| H | 3.37993600  | 1.76067200  | -2.27036300 |
| C | 0.88009700  | 0.72348300  | 2.04104100  |
| F | 0.18758400  | -2.10303000 | 1.25214000  |
| F | 1.66756300  | -0.00970900 | 2.82905300  |
| F | 1.41146300  | 1.96221400  | 1.88068700  |
| F | -0.27949000 | 0.94128400  | 2.75058700  |
| N | -1.41734800 | 1.25988300  | -0.24622900 |
| N | -2.14512700 | -1.30928100 | -0.10755000 |
| O | 5.19633100  | -0.02101700 | -2.06114800 |
| C | 6.19647500  | -1.04674700 | -1.87803900 |
| H | 6.99844800  | -0.80502500 | -2.58653600 |
| H | 6.59160000  | -1.02859500 | -0.84786300 |
| H | 5.78244300  | -2.04310400 | -2.11037800 |

[Pd(bpy)(C<sub>6</sub>H<sub>4</sub>OH)(CF<sub>3</sub>)F]<sup>+</sup> intermediate

|    |             |             |             |
|----|-------------|-------------|-------------|
| Pd | -0.01093700 | -0.45472000 | -0.87507200 |
| C  | -1.33108400 | 2.22423200  | -1.72407600 |
| C  | -2.37700600 | 1.09252200  | 0.06481500  |
| C  | -2.27891600 | 3.27295900  | -1.67708000 |
| H  | -0.51127200 | 2.19573200  | -2.44649600 |
| C  | -3.36185400 | 2.10319200  | 0.17545000  |
| C  | -3.30637000 | 3.20640000  | -0.70843800 |
| H  | -2.20609700 | 4.10529200  | -2.37859300 |
| H  | -4.15303400 | 2.04550000  | 0.92314400  |
| H  | -4.05654100 | 3.99765500  | -0.63927000 |
| C  | -1.18014000 | -2.13194200 | 1.45294900  |
| C  | -2.32482400 | -0.13253000 | 0.92485800  |
| C  | -2.12489400 | -2.47238800 | 2.44455900  |
| H  | -0.32537500 | -2.77377400 | 1.25182000  |
| C  | -3.30358900 | -0.41507700 | 1.90646000  |
| C  | -3.20650200 | -1.59515900 | 2.67577200  |
| H  | -2.00080100 | -3.39845200 | 3.00746900  |
| H  | -4.13569600 | 0.27037000  | 2.06503000  |
| H  | -3.95999800 | -1.82104700 | 3.43373300  |
| C  | 1.47596400  | 0.45336400  | 0.24636500  |
| C  | 1.23234500  | 0.72545400  | 1.60453400  |
| C  | 2.65538700  | 0.78617500  | -0.43626700 |
| C  | 2.25462400  | 1.38829600  | 2.32619300  |
| H  | 0.31286900  | 0.44989300  | 2.11677500  |
| C  | 3.66690600  | 1.44666600  | 0.30792700  |
| H  | 2.79893900  | 0.55782200  | -1.49032200 |
| C  | 3.46965800  | 1.74656300  | 1.68252900  |
| H  | 2.11668400  | 1.62159200  | 3.38422400  |
| H  | 4.59927800  | 1.71804100  | -0.19732600 |
| C  | 1.13417600  | -2.14828000 | -0.99913100 |
| F  | 0.79319000  | 0.18280900  | -2.50642400 |
| F  | 2.22088700  | -2.03138100 | -1.77175800 |
| F  | 1.53742500  | -2.66138500 | 0.19983500  |
| F  | 0.30029800  | -3.07396300 | -1.56848300 |
| N  | -1.27444700 | -0.99905600 | 0.71488300  |

|   |             |            |             |
|---|-------------|------------|-------------|
| N | -1.39417500 | 1.18158700 | -0.87292700 |
| O | 4.40855700  | 2.38230500 | 2.45284700  |
| H | 5.20652200  | 2.56494000 | 1.92358600  |

[Pd(bpy)(C<sub>6</sub>H<sub>4</sub>OH)(CF<sub>3</sub>)F]<sup>+</sup> transition state

|    |             |             |             |
|----|-------------|-------------|-------------|
| Pd | -0.12709800 | -0.46596000 | 0.41468300  |
| C  | -2.30853500 | -2.52694000 | -0.05487700 |
| C  | -2.87242000 | -0.29994000 | -0.62481900 |
| C  | -3.54481600 | -3.00983900 | -0.54192500 |
| H  | -1.53938100 | -3.17013600 | 0.37996400  |
| C  | -4.12379800 | -0.71302500 | -1.13925100 |
| C  | -4.46002600 | -2.08619600 | -1.09627500 |
| H  | -3.76916900 | -4.07597600 | -0.48623400 |
| H  | -4.82100400 | 0.00750300  | -1.56736000 |
| H  | -5.42132800 | -2.42452200 | -1.48999300 |
| C  | -0.68020700 | 2.57704300  | 0.08948200  |
| C  | -2.40333400 | 1.11532800  | -0.56425300 |
| C  | -1.44917000 | 3.71513900  | -0.23216500 |
| H  | 0.31245500  | 2.68938600  | 0.52286000  |
| C  | -3.22492400 | 2.21029800  | -0.92443100 |
| C  | -2.74282700 | 3.52679600  | -0.76662900 |
| H  | -1.03476500 | 4.70946300  | -0.06017400 |
| H  | -4.23252600 | 2.03894100  | -1.30280500 |
| H  | -3.36889200 | 4.38019300  | -1.03655500 |
| C  | 1.89812600  | -0.11965200 | -0.09351800 |
| C  | 2.76080900  | -1.23831100 | -0.01141100 |
| C  | 2.15781300  | 0.95601400  | -0.98103400 |
| C  | 3.87355500  | -1.30631600 | -0.87580600 |
| H  | 2.56505200  | -2.04467900 | 0.69186200  |
| C  | 3.26234000  | 0.87875900  | -1.85005600 |
| H  | 1.52506000  | 1.83983400  | -1.03132900 |
| C  | 4.12691000  | -0.25214000 | -1.79800600 |
| H  | 4.53668200  | -2.17572600 | -0.82749700 |
| H  | 3.47143800  | 1.68093600  | -2.56059900 |
| C  | 1.34105800  | 0.44712800  | 1.89920000  |
| F  | 0.38614300  | -2.25526700 | 0.96648100  |
| F  | 2.13489300  | -0.40301900 | 2.55033200  |
| F  | 1.95098300  | 1.65365400  | 1.78375900  |
| F  | 0.26801600  | 0.68729300  | 2.72702500  |
| N  | -1.12613200 | 1.31153300  | -0.09237900 |
| N  | -2.00349600 | -1.21365500 | -0.10202900 |
| O  | 5.18577100  | -0.25436300 | -2.65865400 |
| H  | 5.72048000  | -1.06014500 | -2.53118400 |

[Pd(bpy)(C<sub>6</sub>H<sub>4</sub>Me)(CF<sub>3</sub>)F]<sup>+</sup> intermediate

|    |             |             |             |
|----|-------------|-------------|-------------|
| Pd | -0.04997600 | -0.47836800 | -0.86953600 |
| C  | -1.30776500 | 2.21804800  | -1.75406000 |
| C  | -2.35068500 | 1.15785300  | 0.07979500  |
| C  | -2.22365200 | 3.29503000  | -1.71303800 |
| H  | -0.50383100 | 2.14889700  | -2.49142800 |
| C  | -3.30358900 | 2.19920600  | 0.18584400  |
| C  | -3.23351300 | 3.28035700  | -0.72389700 |
| H  | -2.14064100 | 4.10889500  | -2.43480100 |
| H  | -4.08140000 | 2.18083400  | 0.94933200  |
| H  | -3.95913600 | 4.09453100  | -0.65883400 |
| C  | -1.22630300 | -2.07244600 | 1.51344100  |
| C  | -2.31864500 | -0.04956200 | 0.96560300  |
| C  | -2.16274300 | -2.36421200 | 2.52824000  |
| H  | -0.39592100 | -2.74463300 | 1.30926600  |
| C  | -3.28728400 | -0.28211700 | 1.97012600  |
| C  | -3.21224500 | -1.44927000 | 2.76119900  |
| H  | -2.05743000 | -3.28305800 | 3.10660000  |
| H  | -4.09545300 | 0.43129000  | 2.12948200  |
| H  | -3.95846500 | -1.63698800 | 3.53657400  |
| C  | 1.48999000  | 0.41464200  | 0.20216600  |
| C  | 1.28611600  | 0.70253200  | 1.55861900  |
| C  | 2.65312200  | 0.71670400  | -0.52139000 |
| C  | 2.35306700  | 1.35584700  | 2.23703400  |

|   |             |             |             |
|---|-------------|-------------|-------------|
| H | 0.37667300  | 0.45043300  | 2.10008800  |
| C | 3.69130800  | 1.36508000  | 0.19799100  |
| H | 2.76147800  | 0.47505700  | -1.57668100 |
| C | 3.56329200  | 1.69154500  | 1.57648000  |
| H | 2.22095300  | 1.59214800  | 3.29660100  |
| H | 4.61021900  | 1.61205300  | -0.34144700 |
| C | 1.04284400  | -2.20716700 | -0.97172000 |
| F | 0.73376300  | 0.09475100  | -2.53578500 |
| F | 2.10895300  | -2.14709900 | -1.77823600 |
| F | 1.46684500  | -2.69061800 | 0.23329700  |
| F | 0.16865400  | -3.12962600 | -1.48415700 |
| N | -1.29889200 | -0.95152000 | 0.75512700  |
| N | -1.38415500 | 1.19711100  | -0.87808600 |
| C | 4.70835100  | 2.37314700  | 2.32174300  |
| H | 5.56451400  | 1.68516100  | 2.43311200  |
| H | 5.06650500  | 3.25952900  | 1.77228000  |
| H | 4.39825400  | 2.69368000  | 3.32808900  |

[Pd(bpy)(C<sub>6</sub>H<sub>4</sub>Me)(CF<sub>3</sub>)F]<sup>+</sup> transition state

|    |             |             |             |
|----|-------------|-------------|-------------|
| Pd | -0.14498700 | -0.43978300 | 0.46939700  |
| C  | -2.27127700 | -2.54429300 | -0.00601100 |
| C  | -2.85515200 | -0.34249300 | -0.65217600 |
| C  | -3.48927200 | -3.05918600 | -0.50620000 |
| H  | -1.50318500 | -3.16251000 | 0.46540100  |
| C  | -4.08870600 | -0.78931000 | -1.18096400 |
| C  | -4.40547700 | -2.16576000 | -1.10632000 |
| H  | -3.69904600 | -4.12662200 | -0.42469100 |
| H  | -4.78712000 | -0.09132200 | -1.64306600 |
| H  | -5.35298200 | -2.52971600 | -1.51047700 |
| C  | -0.71985000 | 2.58287100  | 0.03221700  |
| C  | -2.40800200 | 1.08061200  | -0.62156500 |
| C  | -1.49402100 | 3.70086200  | -0.34361200 |
| H  | 0.26070000  | 2.71996900  | 0.48585500  |
| C  | -3.23326800 | 2.15332900  | -1.03580100 |
| C  | -2.77114000 | 3.47998200  | -0.90478500 |
| H  | -1.09627500 | 4.70522300  | -0.19175200 |
| H  | -4.22830000 | 1.95800900  | -1.43539200 |
| H  | -3.40016500 | 4.31694200  | -1.21613500 |
| C  | 1.90190100  | -0.10052100 | -0.03837400 |
| C  | 2.74756100  | -1.22858700 | 0.06423300  |
| C  | 2.13992300  | 0.93548800  | -0.96874400 |
| C  | 3.83301900  | -1.33031900 | -0.83411200 |
| H  | 2.56123300  | -2.00617600 | 0.80162300  |
| C  | 3.22809200  | 0.80106700  | -1.86298500 |
| H  | 1.51895000  | 1.82707600  | -1.03021200 |
| C  | 4.09456900  | -0.32555200 | -1.80933300 |
| H  | 4.48335600  | -2.20669100 | -0.76657400 |
| H  | 3.40337600  | 1.59095500  | -2.59801200 |
| C  | 1.34720200  | 0.53646100  | 1.90946900  |
| F  | 0.37004200  | -2.20039300 | 1.10346400  |
| F  | 2.15361500  | -0.27596400 | 2.59196400  |
| F  | 1.93777500  | 1.74825000  | 1.75136900  |
| F  | 0.26989300  | 0.79003000  | 2.72971400  |
| N  | -1.14693600 | 1.30743500  | -0.12170100 |
| N  | -1.98459400 | -1.22837900 | -0.08526700 |
| C  | 5.28568800  | -0.45208400 | -2.75153900 |
| H  | 5.28765100  | 0.34522000  | -3.51004700 |
| H  | 6.23364000  | -0.39085800 | -2.18868500 |
| H  | 5.27561400  | -1.42558300 | -3.27030800 |

[Pd(bpy)(C<sub>6</sub>H<sub>4</sub>F)(CF<sub>3</sub>)F]<sup>+</sup> intermediate

|    |             |             |             |
|----|-------------|-------------|-------------|
| Pd | 0.00202300  | -0.43313200 | -0.87629600 |
| C  | -1.33793500 | 2.24757800  | -1.68725000 |
| C  | -2.38625400 | 1.07278700  | 0.07305800  |
| C  | -2.29741300 | 3.28514900  | -1.62933500 |
| H  | -0.51269600 | 2.24086800  | -2.40400000 |
| C  | -3.38269100 | 2.07080600  | 0.19309300  |
| C  | -3.33172200 | 3.19035400  | -0.67046700 |
| H  | -2.22786300 | 4.13050700  | -2.31543700 |

|   |             |             |             |
|---|-------------|-------------|-------------|
| H | -4.17972000 | 1.99140800  | 0.93258200  |
| H | -4.09091900 | 3.97221700  | -0.59345000 |
| C | -1.16715500 | -2.16505000 | 1.41164000  |
| C | -2.32847700 | -0.16738500 | 0.91057400  |
| C | -2.11810700 | -2.53468900 | 2.38659000  |
| H | -0.30389700 | -2.79445900 | 1.20708800  |
| C | -3.31369100 | -0.47967800 | 1.87664800  |
| C | -3.21147300 | -1.67360600 | 2.62372900  |
| H | -1.98985200 | -3.47036200 | 2.93245500  |
| H | -4.15490000 | 0.19349800  | 2.03960600  |
| H | -3.97014500 | -1.92245300 | 3.36924400  |
| C | 1.48077200  | 0.45999400  | 0.26288900  |
| C | 1.22849000  | 0.70006400  | 1.62482500  |
| C | 2.65850800  | 0.81691900  | -0.41597400 |
| C | 2.24391200  | 1.35971400  | 2.36635500  |
| H | 0.30963400  | 0.40442700  | 2.12636200  |
| C | 3.66486000  | 1.47219800  | 0.34002600  |
| H | 2.80149700  | 0.60936000  | -1.47429500 |
| C | 3.43705200  | 1.72937900  | 1.70933400  |
| H | 2.11006100  | 1.57441200  | 3.42860700  |
| H | 4.60374700  | 1.77360600  | -0.12920700 |
| C | 1.16003000  | -2.11737200 | -1.02658900 |
| F | 0.80903100  | 0.24095800  | -2.48974100 |
| F | 2.24667500  | -1.97865600 | -1.79441200 |
| F | 1.56308600  | -2.64693800 | 0.16459900  |
| F | 0.33126500  | -3.03511600 | -1.61349200 |
| N | -1.26648000 | -1.01867100 | 0.69467300  |
| N | -1.39637600 | 1.18934000  | -0.85476700 |
| F | 4.40102600  | 2.35568300  | 2.42369600  |

[Pd(bpy)(C<sub>6</sub>H<sub>4</sub>F)(CF<sub>3</sub>)F]<sup>+</sup> transition state

|    |             |             |             |
|----|-------------|-------------|-------------|
| Pd | -0.12467300 | -0.44264100 | 0.45725500  |
| C  | -2.26264600 | -2.53876600 | 0.00789800  |
| C  | -2.85314100 | -0.33099200 | -0.61385900 |
| C  | -3.48973400 | -3.04787500 | -0.47574400 |
| H  | -1.48853700 | -3.16225700 | 0.46201300  |
| C  | -4.09572900 | -0.77226100 | -1.12533200 |
| C  | -4.41376600 | -2.14878000 | -1.05489200 |
| H  | -3.69994700 | -4.11550600 | -0.39814500 |
| H  | -4.80024000 | -0.07004100 | -1.57148300 |
| H  | -5.36824700 | -2.50835000 | -1.44631800 |
| C  | -0.70240100 | 2.58562700  | 0.05940600  |
| C  | -2.40302900 | 1.09083000  | -0.58029700 |
| C  | -1.48065400 | 3.70776900  | -0.29454100 |
| H  | 0.28477100  | 2.71837300  | 0.49998200  |
| C  | -3.23294200 | 2.16829700  | -0.97222600 |
| C  | -2.76670400 | 3.49319100  | -0.83771300 |
| H  | -1.07930300 | 4.71029000  | -0.14002400 |
| H  | -4.23458900 | 1.97777000  | -1.35732200 |
| H  | -3.39922500 | 4.33357900  | -1.13224800 |
| C  | 1.91017000  | -0.10785900 | -0.08227900 |
| C  | 2.75082000  | -1.24385300 | -0.00504800 |
| C  | 2.13828000  | 0.94210700  | -1.00423200 |
| C  | 3.82530800  | -1.35483600 | -0.91599400 |
| H  | 2.56900900  | -2.02704100 | 0.72746000  |
| C  | 3.20535500  | 0.82647300  | -1.92254900 |
| H  | 1.51994500  | 1.83653700  | -1.03959700 |
| C  | 4.02854100  | -0.32154000 | -1.85820700 |
| H  | 4.49102600  | -2.21988700 | -0.89729000 |
| H  | 3.40449200  | 1.60482600  | -2.66157100 |
| C  | 1.39816200  | 0.51473400  | 1.88125700  |
| F  | 0.39920500  | -2.20898300 | 1.06710700  |
| F  | 2.21342800  | -0.30842000 | 2.53803700  |
| F  | 1.98987500  | 1.72409900  | 1.71961900  |
| F  | 0.33684700  | 0.76312500  | 2.72001300  |
| N  | -1.13331500 | 1.31180900  | -0.09940400 |
| N  | -1.97495400 | -1.22265500 | -0.06725500 |
| F  | 5.05601800  | -0.42698500 | -2.72771700 |



[Pd(bpy)(C<sub>6</sub>H<sub>4</sub>CF<sub>3</sub>)(CF<sub>3</sub>)F]<sup>+</sup> intermediate

|    |             |             |             |
|----|-------------|-------------|-------------|
| Pd | -1.00473200 | -0.70707400 | -0.75209200 |
| C  | -1.60134800 | 1.99439100  | -2.16193300 |
| C  | -2.40682700 | 1.79464400  | 0.04966800  |
| C  | -2.12174700 | 3.30386800  | -2.28324300 |
| H  | -1.06803200 | 1.49005700  | -2.97187200 |
| C  | -2.95432300 | 3.09905400  | 0.00554600  |
| C  | -2.80509900 | 3.86005900  | -1.17789400 |
| H  | -1.99146100 | 3.85769800  | -3.21410300 |
| H  | -3.48260900 | 3.52153000  | 0.86032600  |
| H  | -3.21953900 | 4.86946600  | -1.23180800 |
| C  | -1.94592400 | -1.22655000 | 2.15344600  |
| C  | -2.50428800 | 0.87807600  | 1.23024000  |
| C  | -2.63327000 | -0.94099400 | 3.35229900  |
| H  | -1.42961200 | -2.17492500 | 2.01982700  |
| C  | -3.20761200 | 1.22491100  | 2.40765500  |
| C  | -3.27490400 | 0.30997300  | 3.48116600  |
| H  | -2.65452200 | -1.68663000 | 4.14819900  |
| H  | -3.70376000 | 2.19194800  | 2.48553000  |
| H  | -3.81800000 | 0.57060300  | 4.39241600  |
| C  | 0.94649700  | -0.22249900 | -0.26688300 |
| C  | 1.19014800  | 0.42705000  | 0.95441900  |
| C  | 1.92432900  | -0.53440700 | -1.22409800 |
| C  | 2.53358200  | 0.79435800  | 1.23010700  |
| H  | 0.41300900  | 0.65154900  | 1.68120700  |
| C  | 3.25879300  | -0.15845900 | -0.91799500 |
| H  | 1.68340900  | -1.03238400 | -2.16075800 |
| C  | 3.55678200  | 0.50249500  | 0.29770200  |
| H  | 2.76379200  | 1.30513100  | 2.16713100  |
| H  | 4.04844800  | -0.38059800 | -1.63854900 |
| C  | -0.54580600 | -2.69227900 | -0.52659000 |
| F  | -0.52321500 | -0.81854900 | -2.61500400 |
| F  | 0.21063800  | -3.20149000 | -1.50451600 |
| F  | 0.04243800  | -3.01275500 | 0.66136300  |
| F  | -1.76413900 | -3.31607700 | -0.55386400 |
| N  | -1.88161900 | -0.34680800 | 1.12348200  |
| N  | -1.74620500 | 1.28318700  | -1.02611600 |
| C  | 5.00585400  | 0.86087600  | 0.63106700  |
| F  | 5.62884200  | -0.15833100 | 1.28296200  |
| F  | 5.72690800  | 1.12388500  | -0.48844300 |
| F  | 5.07656000  | 1.95441300  | 1.43628400  |

[Pd(bpy)(C<sub>6</sub>H<sub>4</sub>CF<sub>3</sub>)(CF<sub>3</sub>)F]<sup>+</sup> transition state

|    |             |             |             |
|----|-------------|-------------|-------------|
| Pd | -0.85109900 | -0.27022300 | 0.70207800  |
| C  | -2.66603000 | -2.63605400 | 0.22395800  |
| C  | -3.18780500 | -0.68159100 | -1.01075000 |
| C  | -3.69014500 | -3.36673700 | -0.42125600 |
| H  | -2.00999300 | -3.06323100 | 0.98633200  |
| C  | -4.22275000 | -1.35470800 | -1.70013000 |
| C  | -4.47274800 | -2.71438500 | -1.40055000 |
| H  | -3.85555000 | -4.41224000 | -0.15746400 |
| H  | -4.82032300 | -0.84190600 | -2.45417200 |
| H  | -5.26717000 | -3.25071800 | -1.92472100 |
| C  | -1.45668600 | 2.52983900  | -0.49373900 |
| C  | -2.84158500 | 0.75808100  | -1.18849500 |
| C  | -2.17010500 | 3.46444900  | -1.27345100 |
| H  | -0.63055300 | 2.85594400  | 0.13732900  |
| C  | -3.59033200 | 1.63515600  | -2.00880700 |
| C  | -3.24858100 | 3.00332400  | -2.06063200 |
| H  | -1.87943400 | 4.51566000  | -1.25188200 |
| H  | -4.43825700 | 1.26103000  | -2.58240900 |
| H  | -3.82165800 | 3.69173500  | -2.68573500 |
| C  | 1.24961200  | 0.14955100  | 0.57921600  |
| C  | 2.08301500  | -0.87382700 | 1.08015400  |
| C  | 1.63533200  | 0.98983900  | -0.49001200 |
| C  | 3.33061900  | -1.09006100 | 0.44835000  |
| H  | 1.77139600  | -1.49315500 | 1.91808000  |
| C  | 2.87976100  | 0.75497900  | -1.11750200 |

|   |             |             |             |
|---|-------------|-------------|-------------|
| H | 1.01376600  | 1.80607300  | -0.85170000 |
| C | 3.72188700  | -0.28352300 | -0.64792700 |
| H | 3.98274000  | -1.88625600 | 0.81164300  |
| H | 3.18531000  | 1.37866200  | -1.95939200 |
| C | 0.27363900  | 1.11336600  | 2.17420200  |
| F | -0.41882600 | -1.79956100 | 1.81508800  |
| F | 0.93464100  | 0.52239800  | 3.16710900  |
| F | 0.84088500  | 2.30899000  | 1.88387100  |
| F | -0.96966600 | 1.43257700  | 2.66543100  |
| N | -1.76238400 | 1.21113600  | -0.46624800 |
| N | -2.44004200 | -1.33966600 | -0.07530000 |
| C | 5.09218400  | -0.48955900 | -1.29684600 |
| F | 5.51047100  | -1.77561900 | -1.18803200 |
| F | 5.06940400  | -0.17127800 | -2.61841400 |
| F | 6.03548900  | 0.29577600  | -0.71009400 |

[Pd(bpy)(C<sub>6</sub>H<sub>4</sub>CN)(CF<sub>3</sub>)F]<sup>+</sup> intermediate

|    |             |             |             |
|----|-------------|-------------|-------------|
| Pd | -0.31907200 | -0.60818400 | -0.81710900 |
| C  | -1.27790200 | 2.10965500  | -1.96900000 |
| C  | -2.26556500 | 1.46184600  | 0.07679400  |
| C  | -2.02853400 | 3.30765200  | -2.00623800 |
| H  | -0.57022500 | 1.82685600  | -2.75250800 |
| C  | -3.05035700 | 2.63911100  | 0.11119600  |
| C  | -2.92481800 | 3.57163100  | -0.94553000 |
| H  | -1.90807200 | 4.00021600  | -2.84051800 |
| H  | -3.74142300 | 2.83671000  | 0.93077100  |
| H  | -3.52095900 | 4.48711900  | -0.93715700 |
| C  | -1.44801900 | -1.68677800 | 1.86058900  |
| C  | -2.30781600 | 0.38787000  | 1.11940800  |
| C  | -2.30449100 | -1.69973000 | 2.98193200  |
| H  | -0.74306700 | -2.49763000 | 1.69005800  |
| C  | -3.18941700 | 0.43459300  | 2.22475900  |
| C  | -3.19078800 | -0.61664200 | 3.16759000  |
| H  | -2.26423200 | -2.53966900 | 3.67678800  |
| H  | -3.87185800 | 1.27538900  | 2.34567900  |
| H  | -3.87009700 | -0.58769800 | 4.02255000  |
| C  | 1.43351900  | 0.14630900  | -0.02520800 |
| C  | 1.41882300  | 0.64528600  | 1.28879800  |
| C  | 2.54866600  | 0.15459500  | -0.87904200 |
| C  | 2.62669600  | 1.20202200  | 1.78055700  |
| H  | 0.54136800  | 0.61863000  | 1.93086800  |
| C  | 3.74607200  | 0.71307600  | -0.36442000 |
| H  | 2.50506000  | -0.24148900 | -1.89141400 |
| C  | 3.78520900  | 1.23552800  | 0.95763200  |
| H  | 2.66159600  | 1.60039800  | 2.79656700  |
| H  | 4.63817000  | 0.73875100  | -0.99352600 |
| C  | 0.49428500  | -2.49070100 | -0.77442700 |
| F  | 0.37050400  | -0.37476500 | -2.60111500 |
| F  | 1.46266100  | -2.69724700 | -1.67285800 |
| F  | 0.96901600  | -2.88371000 | 0.44209800  |
| F  | -0.56060100 | -3.30624300 | -1.07938200 |
| N  | -1.44705200 | -0.67630300 | 0.95588000  |
| N  | -1.40411400 | 1.23275400  | -0.95303000 |
| C  | 5.01839600  | 1.81120600  | 1.47623800  |
| N  | 6.01446100  | 2.28031700  | 1.90006900  |

[Pd(bpy)(C<sub>6</sub>H<sub>4</sub>CN)(CF<sub>3</sub>)F]<sup>+</sup> transition state

|    |             |             |             |
|----|-------------|-------------|-------------|
| Pd | -0.30222200 | -0.38448200 | 0.57372400  |
| C  | -2.30879800 | -2.57852100 | 0.04516100  |
| C  | -2.87801700 | -0.44459100 | -0.81477100 |
| C  | -3.45675600 | -3.16451500 | -0.53591700 |
| H  | -1.57900000 | -3.13936300 | 0.63414200  |
| C  | -4.03883300 | -0.96705900 | -1.43051800 |
| C  | -4.32774700 | -2.34455400 | -1.28839900 |
| H  | -3.64751500 | -4.22970300 | -0.39802300 |
| H  | -4.70355700 | -0.32562900 | -2.00953700 |
| H  | -5.21965300 | -2.76557400 | -1.75824700 |
| C  | -0.90550900 | 2.58626900  | -0.10659900 |

|   |             |             |             |
|---|-------------|-------------|-------------|
| C | -2.47318700 | 0.99056200  | -0.83835600 |
| C | -1.66207300 | 3.65215700  | -0.63756500 |
| H | 0.01524000  | 2.78458700  | 0.44098800  |
| C | -3.27336300 | 2.00698400  | -1.41233400 |
| C | -2.86191600 | 3.35364700  | -1.32071400 |
| H | -1.31042100 | 4.67687500  | -0.50984400 |
| H | -4.21168000 | 1.75415800  | -1.90587100 |
| H | -3.47260700 | 4.14794800  | -1.75571800 |
| C | 1.77944800  | -0.03379100 | 0.20205700  |
| C | 2.61246900  | -1.15648600 | 0.41023400  |
| C | 2.06610000  | 0.95605500  | -0.76660400 |
| C | 3.74358800  | -1.31652800 | -0.42093500 |
| H | 2.38375500  | -1.89096200 | 1.17918800  |
| C | 3.19264600  | 0.78382000  | -1.59963200 |
| H | 1.45182400  | 1.84416700  | -0.89674800 |
| C | 4.03177200  | -0.35338500 | -1.42831200 |
| H | 4.39554000  | -2.18165200 | -0.28693900 |
| H | 3.42357700  | 1.52550600  | -2.36635800 |
| C | 1.10408700  | 0.70893300  | 2.05173800  |
| F | 0.19593100  | -2.08050500 | 1.37123800  |
| F | 1.89181400  | -0.03647100 | 2.82370300  |
| F | 1.66339700  | 1.92659300  | 1.85170000  |
| F | -0.03082500 | 0.96371500  | 2.78143600  |
| N | -1.28038300 | 1.29022900  | -0.22218900 |
| N | -2.04824400 | -1.26237700 | -0.10085300 |
| C | 5.19598600  | -0.52255900 | -2.28485600 |
| N | 6.13640700  | -0.65825200 | -2.98454000 |

[Pd(bpy)(C<sub>6</sub>H<sub>4</sub>NO<sub>2</sub>)(CF<sub>3</sub>)F]<sup>+</sup> intermediate

|    |             |             |             |
|----|-------------|-------------|-------------|
| Pd | -0.67915900 | -0.70513400 | -0.76201400 |
| C  | -1.38433100 | 1.97144100  | -2.16929600 |
| C  | -2.28773200 | 1.68298000  | -0.00545600 |
| C  | -1.98490100 | 3.24510400  | -2.30128300 |
| H  | -0.77776200 | 1.51701600  | -2.95687300 |
| C  | -2.91908600 | 2.94828400  | -0.06220700 |
| C  | -2.76064900 | 3.73648500  | -1.22661000 |
| H  | -1.84427400 | 3.82118500  | -3.21700700 |
| H  | -3.51804300 | 3.32088300  | 0.76881300  |
| H  | -3.23912100 | 4.71661000  | -1.28961300 |
| C  | -1.73328400 | -1.33475800 | 2.08129000  |
| C  | -2.38421000 | 0.74287200  | 1.15620800  |
| C  | -2.50322700 | -1.11715500 | 3.24354200  |
| H  | -1.14619700 | -2.24307900 | 1.96368600  |
| C  | -3.17219700 | 1.02097300  | 2.29762800  |
| C  | -3.23491000 | 0.08530700  | 3.35346900  |
| H  | -2.51680200 | -1.87622900 | 4.02681000  |
| H  | -3.73759700 | 1.95035900  | 2.36057000  |
| H  | -3.84343900 | 0.29288300  | 4.23656300  |
| C  | 1.20332800  | -0.10250400 | -0.16867000 |
| C  | 1.34178200  | 0.53368000  | 1.07862600  |
| C  | 2.24685400  | -0.32934800 | -1.08246400 |
| C  | 2.63817800  | 0.98488000  | 1.43376700  |
| H  | 0.51572500  | 0.68576500  | 1.76930700  |
| C  | 3.53758900  | 0.12540100  | -0.70907100 |
| H  | 2.08184800  | -0.82531600 | -2.03643400 |
| C  | 3.70524000  | 0.77201400  | 0.53480400  |
| H  | 2.81366700  | 1.48515300  | 2.38655300  |
| H  | 4.39012400  | -0.02077700 | -1.37320500 |
| C  | -0.09478100 | -2.65994300 | -0.54394800 |
| F  | -0.09934600 | -0.75622100 | -2.59963500 |
| F  | 0.76759700  | -3.08722600 | -1.47164300 |
| F  | 0.42542500  | -2.96855900 | 0.67817600  |
| F  | -1.25975400 | -3.36363100 | -0.67759700 |
| N  | -1.67341800 | -0.43502300 | 1.06821200  |
| N  | -1.53926100 | 1.23404700  | -1.05144800 |
| N  | 5.06397500  | 1.25234500  | 0.91823200  |
| O  | 5.98810700  | 1.05632100  | 0.10678200  |
| O  | 5.17649900  | 1.81849800  | 2.02356500  |

[Pd(bpy)(C<sub>6</sub>H<sub>4</sub>NO<sub>2</sub>)(CF<sub>3</sub>)F]<sup>+</sup> transition state

|    |             |             |             |
|----|-------------|-------------|-------------|
| Pd | -0.57368700 | -0.35706600 | 0.63794300  |
| C  | -2.45044300 | -2.63012600 | -0.00656400 |
| C  | -3.01294500 | -0.53655100 | -0.96560000 |
| C  | -3.52545000 | -3.26771700 | -0.66733300 |
| H  | -1.75663100 | -3.15239400 | 0.65664500  |
| C  | -4.10005900 | -1.11218000 | -1.66293900 |
| C  | -4.35520900 | -2.49533500 | -1.51118500 |
| H  | -3.69280400 | -4.33541600 | -0.51887300 |
| H  | -4.73383500 | -0.50661700 | -2.31112200 |
| H  | -5.18977300 | -2.95724000 | -2.04377000 |
| C  | -1.20396000 | 2.57411000  | -0.17352500 |
| C  | -2.65417600 | 0.91056100  | -0.99178200 |
| C  | -1.94595400 | 3.60162700  | -0.79316400 |
| H  | -0.33812000 | 2.81609500  | 0.44209000  |
| C  | -3.43490600 | 1.88625600  | -1.65604000 |
| C  | -3.07496000 | 3.24769600  | -1.56490500 |
| H  | -1.63782700 | 4.64007800  | -0.66394300 |
| H  | -4.32013400 | 1.59111500  | -2.21924800 |
| H  | -3.67176200 | 4.01111300  | -2.06897800 |
| C  | 1.52438600  | 0.05001500  | 0.44192100  |
| C  | 2.36618400  | -1.04071500 | 0.75671300  |
| C  | 1.85917500  | 1.01682300  | -0.53540500 |
| C  | 3.56729700  | -1.19554500 | 0.02612700  |
| H  | 2.09438200  | -1.75633600 | 1.52921100  |
| C  | 3.05365800  | 0.85384800  | -1.27122100 |
| H  | 1.23177500  | 1.88045900  | -0.74303400 |
| C  | 3.88304300  | -0.25141700 | -0.97570400 |
| H  | 4.24110500  | -2.02843500 | 0.22790200  |
| H  | 3.34133700  | 1.56493000  | -2.04556400 |
| C  | 0.67365300  | 0.82366300  | 2.19763300  |
| F  | -0.09993900 | -2.01226100 | 1.52884500  |
| F  | 1.39067500  | 0.11234100  | 3.06377400  |
| F  | 1.23513300  | 2.04228600  | 2.01480800  |
| F  | -0.53095900 | 1.08310500  | 2.80215400  |
| N  | -1.52789700 | 1.26410000  | -0.28575700 |
| N  | -2.22048100 | -1.30950500 | -0.16423400 |
| N  | 5.14752800  | -0.41905100 | -1.74998100 |
| O  | 5.86562000  | -1.39547100 | -1.46385800 |
| O  | 5.39158500  | 0.42916900  | -2.63055200 |

[Pd(tmeda)(C<sub>6</sub>H<sub>5</sub>)(CF<sub>3</sub>)(F)(OTf)]

|    |             |             |             |
|----|-------------|-------------|-------------|
| Pd | -0.54426500 | -0.00588600 | 0.00700900  |
| C  | -2.54260300 | -0.16710700 | -0.53001100 |
| C  | -2.82169800 | -0.96097300 | -1.66526200 |
| C  | -3.57316400 | 0.54051100  | 0.12239400  |
| C  | -4.16053400 | -1.06705100 | -2.11898300 |
| H  | -2.02001300 | -1.47263500 | -2.20141900 |
| C  | -4.90871600 | 0.43339900  | -0.34851400 |
| H  | -3.38619300 | 1.19699000  | 0.97356900  |
| C  | -5.20789200 | -0.37770700 | -1.46499800 |
| H  | -4.37164800 | -1.69142800 | -2.99495200 |
| H  | -5.70065300 | 0.98934700  | 0.16770300  |
| C  | -0.68012500 | -2.01783400 | 0.49183900  |
| F  | -1.71381200 | -2.23123300 | 1.34786000  |
| F  | 0.42531300  | -2.41771300 | 1.12905800  |
| F  | -0.85526400 | -2.80246900 | -0.56173100 |
| F  | -0.19373000 | -0.35193600 | -1.87530600 |
| O  | 1.64791300  | 0.15751600  | 0.32355600  |
| S  | 2.77155700  | -0.83393200 | 0.06141700  |
| O  | 2.43317900  | -1.89574600 | -0.87235600 |
| O  | 3.48345800  | -1.15464200 | 1.29757700  |
| C  | 3.94245700  | 0.28670000  | -0.87646700 |
| F  | 4.21972800  | 1.38942100  | -0.15790800 |
| F  | 5.08698300  | -0.34787100 | -1.13236200 |
| F  | 3.40107300  | 0.67566800  | -2.03804200 |
| H  | -6.23907800 | -0.46451200 | -1.82540200 |
| C  | -0.72223600 | 2.84938200  | 0.87543400  |

|   |             |             |             |
|---|-------------|-------------|-------------|
| H | -0.35763400 | 3.89870100  | 0.89125900  |
| H | -1.81968000 | 2.88710400  | 1.01702000  |
| C | -0.05437600 | 2.05823600  | 2.00607200  |
| H | 1.03129900  | 1.97532400  | 1.82904500  |
| H | -0.20612700 | 2.56732700  | 2.98015400  |
| C | -1.88536900 | 0.66377400  | 2.85833500  |
| H | -2.41361000 | -0.29067700 | 2.70805400  |
| H | -1.67491600 | 0.80328700  | 3.93636200  |
| H | -2.52178200 | 1.49996700  | 2.53684800  |
| C | 0.35740500  | -0.13910100 | 2.96928700  |
| H | 0.48966300  | 0.40240600  | 3.92721200  |
| H | -0.07974900 | -1.12821800 | 3.17286200  |
| H | 1.32681900  | -0.25474400 | 2.46775700  |
| C | -1.42595300 | 2.65612000  | -1.46776500 |
| H | -1.32344800 | 3.74506300  | -1.65843500 |
| H | -1.22528100 | 2.09538000  | -2.39588900 |
| H | -2.45535900 | 2.43772500  | -1.14172600 |
| C | 0.90614000  | 2.60106700  | -0.94237000 |
| H | 0.91090500  | 3.68143700  | -1.19913900 |
| H | 1.67947300  | 2.39137600  | -0.18994800 |
| H | 1.13290300  | 1.99766400  | -1.83534100 |
| N | -0.59444000 | 0.65219600  | 2.11140100  |
| N | -0.44465300 | 2.22043700  | -0.44268300 |

[Pd(tmeda)(C<sub>6</sub>H<sub>5</sub>)(CF<sub>3</sub>)F]<sup>+</sup> intermediate

|    |             |             |             |
|----|-------------|-------------|-------------|
| Pd | 0.38464400  | 0.19848000  | -0.44272200 |
| C  | -1.52133900 | -0.38077800 | 0.15413100  |
| C  | -1.68176200 | -0.85514900 | 1.46308300  |
| C  | -2.52580800 | -0.32588800 | -0.82295200 |
| C  | -2.97890500 | -1.31637300 | 1.82000300  |
| H  | -0.87953900 | -0.89758600 | 2.20520600  |
| C  | -3.80825600 | -0.79247900 | -0.42410500 |
| H  | -2.34111500 | 0.04396700  | -1.83317100 |
| C  | -4.03523200 | -1.28077900 | 0.88272300  |
| H  | -3.13872700 | -1.69482600 | 2.83583100  |
| H  | -4.62048400 | -0.76207500 | -1.15878000 |
| H  | -5.03123300 | -1.63210500 | 1.17077800  |
| C  | -0.39383200 | 2.11156900  | -0.39809300 |
| F  | -0.19265000 | 0.00611800  | -2.28853300 |
| F  | -1.31087900 | 2.34360100  | -1.31874800 |
| F  | -0.88588400 | 2.47806400  | 0.79625200  |
| F  | 0.67815400  | 2.89447300  | -0.65680500 |
| N  | 1.56456500  | 0.36844600  | 1.34534800  |
| N  | 1.44226400  | -1.76806700 | -0.61311000 |
| C  | 2.44680200  | -1.82527200 | 0.48967800  |
| H  | 2.64744800  | -2.87500200 | 0.78134300  |
| H  | 3.40234200  | -1.41270300 | 0.12129900  |
| C  | 1.95470800  | -1.04167700 | 1.70837600  |
| H  | 2.74323700  | -1.00312500 | 2.48682400  |
| H  | 1.06943800  | -1.52774900 | 2.15668600  |
| C  | 1.08347500  | 1.07223300  | 2.57290400  |
| H  | 1.85707400  | 0.99680000  | 3.36111400  |
| H  | 0.89781300  | 2.13026400  | 2.34259300  |
| H  | 0.14761100  | 0.62310700  | 2.93599500  |
| C  | 2.76494100  | 1.11489600  | 0.83845400  |
| H  | 2.51879300  | 2.18259200  | 0.74663200  |
| H  | 3.60897000  | 0.99022500  | 1.54429500  |
| H  | 3.07754600  | 0.74386900  | -0.15374700 |
| C  | 2.11134700  | -1.86961600 | -1.94186400 |
| H  | 2.66063900  | -2.82893300 | -2.02170400 |
| H  | 1.34756800  | -1.80216800 | -2.73098300 |
| H  | 2.82067100  | -1.03284600 | -2.06932300 |
| C  | 0.45805100  | -2.87798400 | -0.49001100 |
| H  | 0.00385200  | -2.88062400 | 0.51511500  |
| H  | -0.33858100 | -2.73954800 | -1.23945300 |
| H  | 0.96143700  | -3.85079000 | -0.66046900 |

[Pd(tmeda)(C<sub>6</sub>H<sub>5</sub>)(CF<sub>3</sub>)F]<sup>+</sup> transition state

|    |             |             |             |
|----|-------------|-------------|-------------|
| Pd | -0.41478000 | -0.21983500 | -0.16144100 |
| C  | 1.69566200  | -0.01297600 | -0.23297200 |
| C  | 2.13831500  | -0.74710200 | -1.36175800 |
| C  | 2.49114800  | 0.98512300  | 0.37394900  |
| C  | 3.37136800  | -0.38170700 | -1.95659100 |
| H  | 1.54071400  | -1.57177600 | -1.76029400 |
| C  | 3.72772600  | 1.32094600  | -0.22768600 |
| H  | 2.20657700  | 1.47399000  | 1.31009300  |
| C  | 4.16221200  | 0.64862300  | -1.39591000 |
| H  | 3.71129700  | -0.92349000 | -2.84572800 |
| H  | 4.35328800  | 2.09210000  | 0.23489100  |
| H  | 5.12429700  | 0.90913000  | -1.84956600 |
| C  | 0.82708000  | -1.11192400 | 1.49131100  |
| F  | -0.28236700 | -2.07059300 | -0.79935800 |
| F  | 1.72826000  | -2.04956100 | 1.32240700  |
| F  | 1.21318000  | -0.24500500 | 2.42914300  |
| F  | -0.28751000 | -1.70323100 | 1.96283400  |
| C  | -3.17979800 | 0.84221100  | -0.21947100 |
| H  | -4.11199500 | 1.01902300  | -0.79163500 |
| H  | -3.47060500 | 0.65754600  | 0.82975900  |
| C  | -2.25020100 | 2.04143700  | -0.33139800 |
| H  | -2.72111100 | 2.95298700  | 0.08734800  |
| H  | -2.01373300 | 2.25014500  | -1.39065900 |
| C  | -0.02303900 | 2.89326200  | -0.07389300 |
| H  | 0.88703000  | 2.90807100  | 0.53888000  |
| H  | 0.25516400  | 2.73284900  | -1.12834500 |
| H  | -0.53985900 | 3.86685100  | 0.03438500  |
| C  | -1.12019400 | 1.90441600  | 1.85674700  |
| H  | -0.14450800 | 1.76838100  | 2.34854300  |
| H  | -1.52577800 | 2.90190000  | 2.11684200  |
| H  | -1.80479000 | 1.12241600  | 2.22496900  |
| C  | -3.08805300 | -1.60322100 | -0.13553000 |
| H  | -2.54984600 | -2.48525000 | -0.51045500 |
| H  | -2.99498700 | -1.56361300 | 0.96271500  |
| H  | -4.15814100 | -1.65566300 | -0.41859800 |
| C  | -2.53976300 | -0.47488100 | -2.21750000 |
| H  | -2.11935800 | 0.43078600  | -2.68610800 |
| H  | -1.94623300 | -1.34903000 | -2.52669500 |
| H  | -3.59157000 | -0.59939700 | -2.54210400 |
| N  | -2.47985000 | -0.37377800 | -0.72883900 |
| N  | -0.93798200 | 1.79730700  | 0.37698600  |

## References

- <sup>1</sup> For further information on using this method to reference NMR spectra, refer to the following website: [www.iupac.org/publications/pac/2001/7311/7311x1795.html](http://www.iupac.org/publications/pac/2001/7311/7311x1795.html).
- <sup>2</sup> Takahashi, Y.; Ito, S. S.; Sukai, S.; Ishii, Y. *J. Chem. Soc. Dalton Trans.* **1970**, 17, 1065-1066.
- <sup>3</sup> Foley, S. R.; Han, S.; Qadeer, U. A.; Jordan, R. F. *Organometallics* **2004**, 23, 600-609.
- <sup>4</sup> Ball, N. D.; Sanford, M. S. *J. Am. Chem. Soc.* **2009**, 131, 3796-3797.
- <sup>5</sup> Markies, B. A.; Canty, A. J.; de Graff, G.; Boersma, J.; Janssen, M. D.; Hogerheide, M. P.; Smeets, W. J. J.; Spek, A. L.; van Koten, G. *J. Organomet. Chem.* **1994**, 482, 191-199.
- <sup>6</sup> Ball, N.D.; Kampf, J. W.; Sanford, M. S. *J. Am. Chem. Soc.* **2010**, 132, 2878-2879.
- <sup>7</sup> Marshall, W. J.; Grushin, V. V. *Can. J. Chem.* **2005**, 83, 640-645.
- <sup>8</sup> Gamzaeva, S. A.; Mamedova, P. S.; Allakhverdieva, K. M.; Velieva, G. K.; Akhundova, M. A.; Allakhverdiev, M. A. *Russ. J. Appl. Chem.* **2009**, 82, 1577-1581.
- <sup>9</sup> Gaussian 09, Revision A.02, Frisch, M. J.; Trucks, G. W.; Schlegel, H. B.; Scuseria, G. E.; Robb, M. A.; Cheeseman, J. R.; Scalmani, G.; Barone, V.; Mennucci, B.; Petersson, G. A.; Nakatsuji, H.; Caricato, M.; Li, X.; Hratchian, H. P.; Izmaylov, A. F.; Bloino, J.; Zheng, G.; Sonnenberg, J. L.; Hada, M.; Ehara, M.; Toyota, K.; Fukuda, R.; Hasegawa, J.; Ishida, M.; Nakajima, T.; Honda, Y.; Kitao, O.; Nakai, H.; Vreven, T.; Montgomery, Jr., J. A.; Peralta, J. E.; Ogliaro, F.; Bearpark, M.; Heyd, J. J.; Brothers, E.; Kudin, K. N.; Staroverov, V. N.; Kobayashi, R.; Normand, J.; Raghavachari, K.; Rendell, A.; Burant, J. C.; Iyengar, S. S.; Tomasi, J.; Cossi, M.; Rega, N.; Millam, N. J.; Klene, M.; Knox, J. E.; Cross, J. B.; Bakken, V.; Adamo, C.; Jaramillo, J.; Gomperts, R.; Stratmann, R. E.; Yazyev, O.; Austin, A. J.; Cammi, R.; Pomelli, C.; Ochterski, J. W.; Martin, R. L.; Morokuma, K.; Zakrzewski, V. G.; Voth, G. A.; Salvador, P.; Dannenberg, J. J.; Dapprich, S.; Daniels, A. D.; Farkas, Ö.; Foresman, J. B.; Ortiz, J. V.; Cioslowski, J.; Fox, D. J. Gaussian, Inc., Wallingford CT, 2009.
- <sup>10</sup> Zhao, Y.; Truhlar, D. G. *Theor. Chem. Acc.* **2008**, 120, 215-241.
- <sup>11</sup> Stevens, W. J.; Basch, H.; Krauss, M. *J. Chem. Phys.* **1984**, 81, 6026-6033.
- <sup>12</sup> Stevens, W. J.; Krauss, M.; Basch, H.; Jasien, P. G. *Can. J. Chem.* **1992**, 70, 612-630.
- <sup>13</sup> Feller, D. *J. Comp. Chem.* **1996**, 17, 1571-1586.
- <sup>14</sup> Schuchardt, K. L.; Didier, B. T.; Elsethagen, T.; Sun, L.; Gurumoorthi, V.; Chase, J.; Li, J.; Windus, T. L. *J. Chem. Inf. Model.* **2007**, 47, 1045-1052.
- <sup>15</sup> Marenich, A. V.; Cramer, C. J.; Truhlar, D. G. *J. Phys. Chem. B* **2009**, 113, 6378-6396.
- <sup>16</sup> Ehlers, A. W.; Böhme, M.; Dapprich, S.; Gobbi, A.; Höllwarth, A.; Jonas, V.; Köhler, K. F.; Stegmann, R.; Veldkamp, A.; Frenking, G. *Chem. Phys. Lett.* **1993**, 208, 111-114.
- <sup>17</sup> NBO Version 3.1, E. D. Glendening, A. E. Reed, J. E. Carpenter, F. Weinhold.

## STANDARD PROTON PARAMETERS

Sample Name:  
 Data Collected on:  
 Co.Chem.LSA,UMich.edu-vnmrs400  
 Archive directory:  
 Sample directory:  
 FidFile: 5-ndb-124-forcarbon-H

Pulse Sequence: PROTON (s2pul)  
 Solvent: cdcl3  
 Data collected on: Jun 21 2010

Temp. 30.0 C / 303.1 K  
 Operator: nball

Relax. delay 0.500 sec  
 Pulse 45.0 degrees  
 Acq. time 3.500 sec  
 Width 6410.3 Hz  
 16 repetitions  
 OBSERVE H1, 400.5206388 MHz  
 DATA PROCESSING  
 Line broadening 0.3 Hz  
 FT size 65536  
 Total time 1 min 12 sec

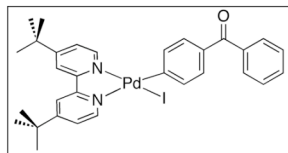

VARIAN

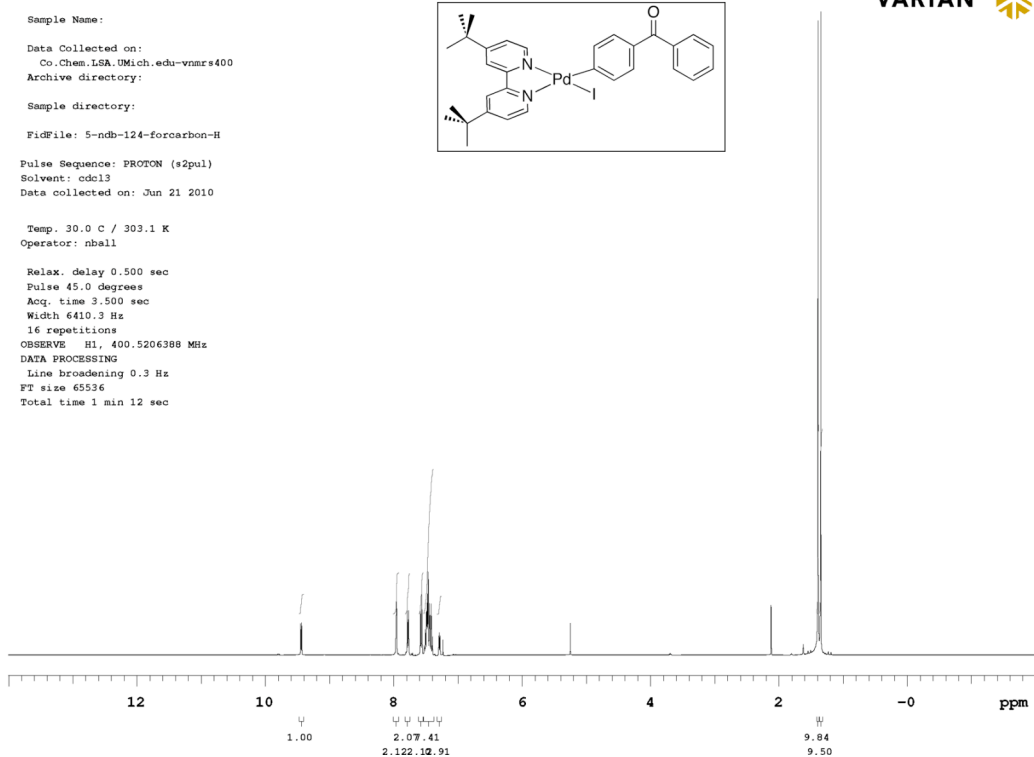

## STANDARD CARBON PARAMETERS

Sample Name:  
 Data Collected on:  
 Co.Chem.LSA,UMich.edu-vnmrs400  
 Archive directory:  
 Sample directory:  
 FidFile: 5-ndb-124-forcarbon-C2

Pulse Sequence: CARBON (s2pul)  
 Solvent: cdcl3  
 Data collected on: Jun 22 2010

Temp. 30.0 C / 303.1 K  
 Operator: nball

Relax. delay 0.100 sec  
 Pulse 45.0 degrees  
 Acq. time 2.569 sec  
 Width 25510.2 Hz  
 3776 repetitions  
 OBSERVE C13, 100.7109943 MHz  
 DECOUPLE H1, 400.5226414 MHz  
 Power 41 dB  
 continuously on  
 WALTZ-16 modulated  
 DATA PROCESSING  
 Line broadening 1.0 Hz  
 FT size 131072  
 Total time 2 hr, 48 min

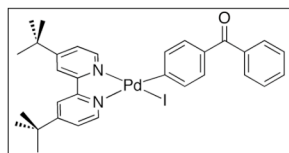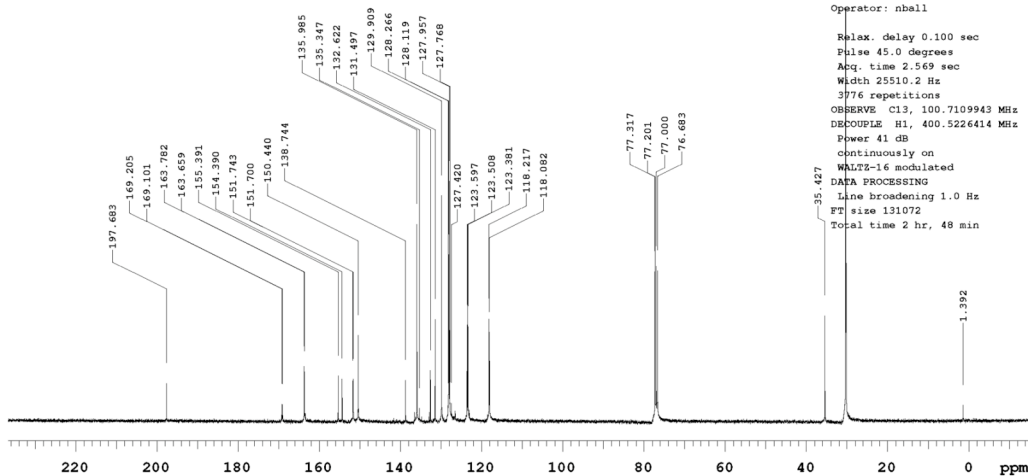



Sample Name:  
 Data Collected on:  
 Co.Chem.LSA,UMich.edu-vnmrs400  
 Archive directory:  
 Sample directory:  
 FidFile: 5-ndb-124-forcarbon-C2  
 Pulse Sequence: CARBON (#2pul)  
 Solvent: cdcl3  
 Data collected on: Jun 22 2010

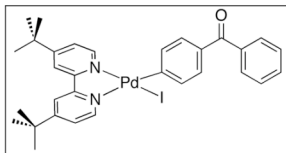

Temp. 30.0 C / 303.1 K  
 Operator: nbhall

Relax. delay 0.100 sec  
 Pulse 45.0 degrees  
 Acq. time 2.569 sec  
 Width 25510.2 Hz  
 3776 repetitions  
 OBSERVE C13, 100.7109943 MHz  
 DECOUPLE H1, 400.5226414 MHz  
 Power 41 dB  
 continuously on  
 WALTZ-16 modulated  
 DATA PROCESSING  
 Line broadening 1.0 Hz  
 FT size 131072  
 Total time 2 hr, 48 min

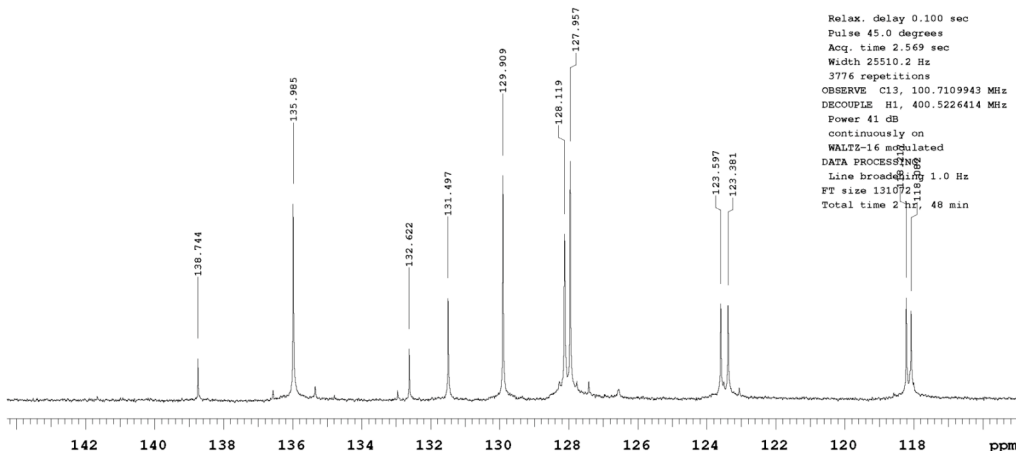

YY-3-115-n-Me-H

Sample Name:  
 Data Collected on:  
 Co.Chem.LSA,UMich.edu-vnmrs400  
 Archive directory:  
 Sample directory:  
 FidFile: YY-3-115-n-Me-H  
 Pulse Sequence: PROTON (#2pul)  
 Solvent: cdcl3  
 Data collected on: Nov 17 2010

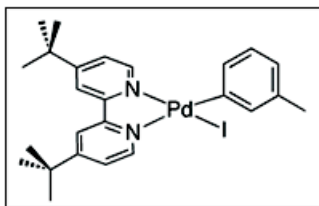

Operator: yingdays  
 Relax. delay 0.500 sec  
 Pulse 45.0 degrees  
 Acq. time 3.500 sec  
 Width 6410.3 Hz  
 16 repetitions  
 OBSERVE H1, 400.5206314 MHz  
 DATA PROCESSING  
 Line broadening 0.3 Hz  
 FT size 65536  
 Total time 1 min 12 sec

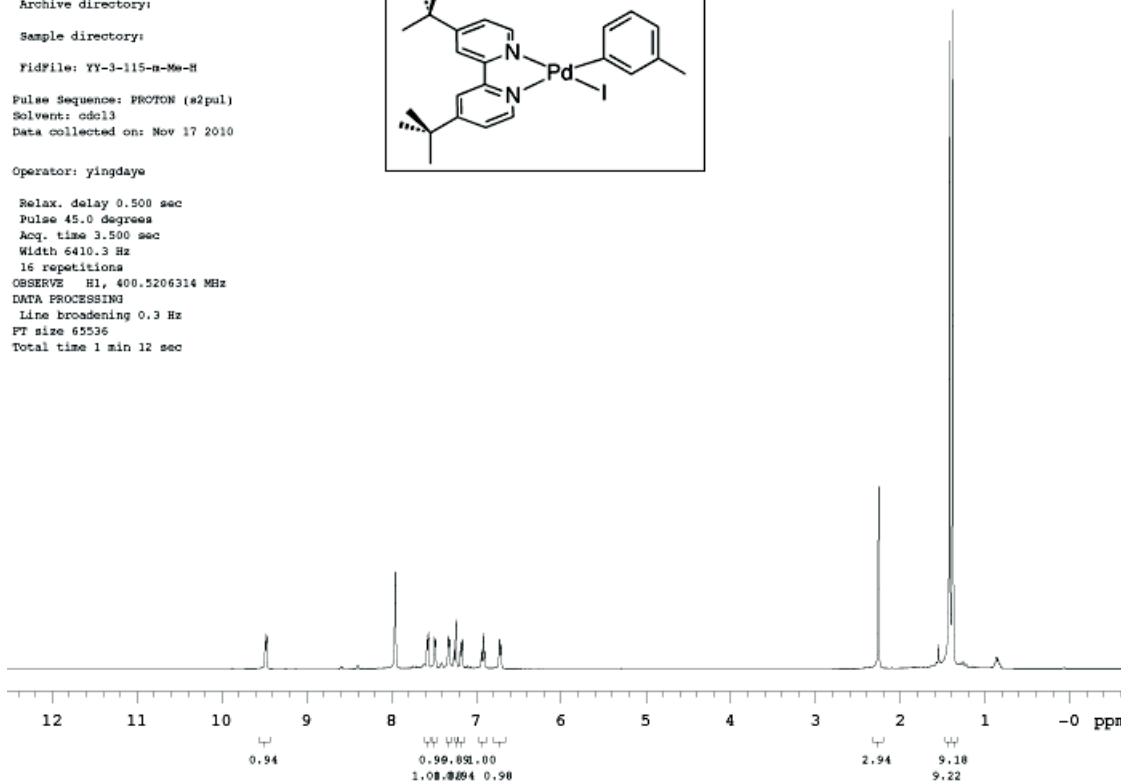

YY-3-115-n-Me-C

Sample Name:

Data Collected on:  
Co.Chem.LSA.UMich.edu-vnmrs400  
Archive directory:

Sample directory:

FidFile: YY-3-115-n-Me-C

Pulse Sequence: CARBON (s2pul)  
Solvent: cdcl3  
Data collected on: Nov 17 2010

Operator: yingdaye

Relax. delay 0.100 sec  
Pulse 45.0 degree  
Acq. time 2.569 sec  
Width 25510.2 Hz  
240 repetitions  
OBSERVE C13, 100.7109813 MHz  
DECOUPLE H1, 400.5226414 MHz  
Power 41 dB  
continuously on  
WALTZ-16 modulated  
DATA PROCESSING  
Line broadening 1.0 Hz  
FT size 131072  
Total time 10 min

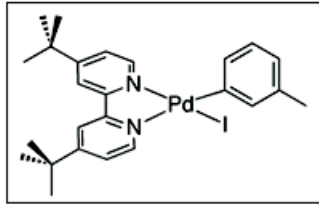

VARIAN

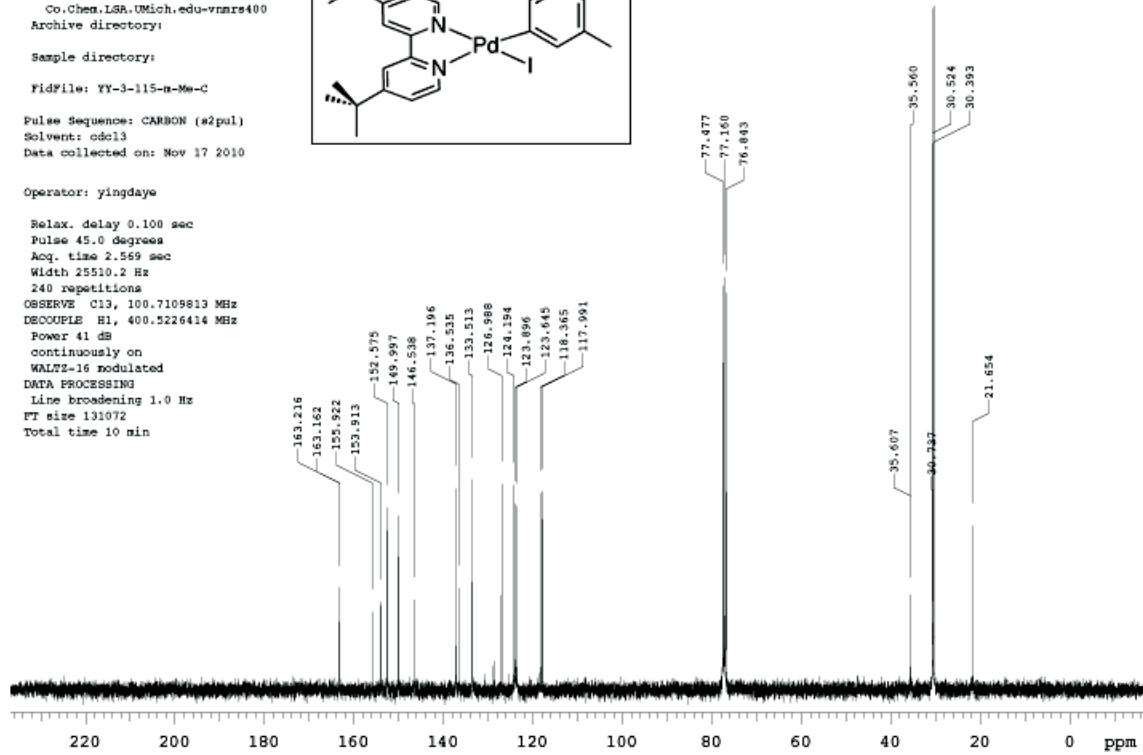

5-ndb-184-forcarbon-H

Sample Name:

Data Collected on:  
Te-vnmrs500  
Archive directory:

Sample directory:

FidFile: 5-ndb-184-forcarbon-H

Pulse Sequence: PROTON (s2pul)  
Solvent: cdcl3  
Data collected on: Aug 30 2010

Temp. 25.0 C / 298.1 K  
Operator: nball

Relax. delay 0.500 sec  
Pulse 45.0 degrees  
Acq. time 3.500 sec  
Width 8012.8 Hz  
16 repetitions  
OBSERVE H1, 500.0931802 MHz  
DATA PROCESSING  
Line broadening 0.3 Hz  
FT size 65536  
Total time 1 min 12 sec

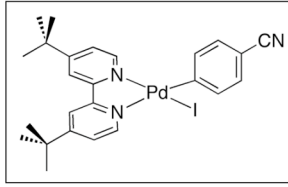

VARIAN

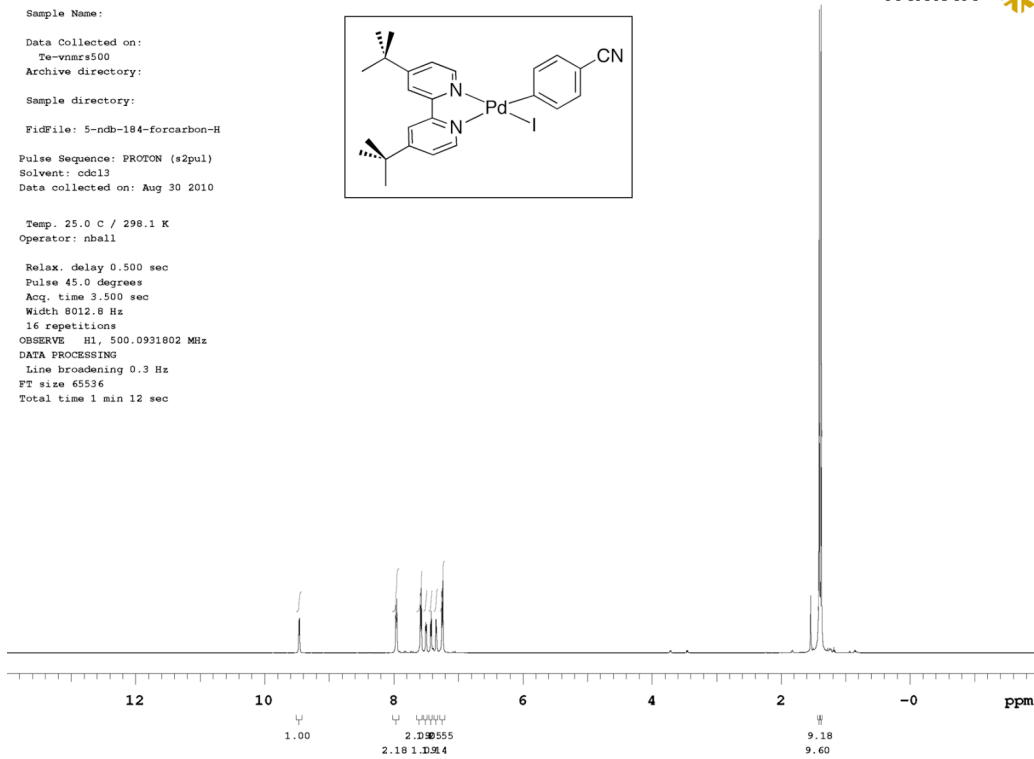

5-ndb-184-forcarbon-C

Sample Name:

Data Collected on:  
Te-vnmrs500  
Archive directory:

Sample directory:

FidFile: 5-ndb-184-forcarbon-C

Pulse Sequence: CARBON (s2pul)  
Solvent: cdcl3  
Data collected on: Aug 30 2010

Temp. 25.0 C / 298.1 K  
Operator: nball

Relax. delay 0.100 sec  
Pulse 45.0 degrees  
Acq. time 2.045 sec  
Width 32051.3 Hz  
1216 repetitions  
OBSERVE C13, 125.7485364 MHz  
DECOUPLE H1, 500.0956704 MHz  
Power 42 dB  
continuously on  
WALTZ-16 modulated  
DATA PROCESSING  
Line broadening 1.0 Hz  
FT size 131072  
Total time 43 min

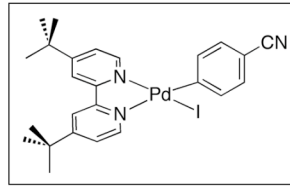

VARIAN

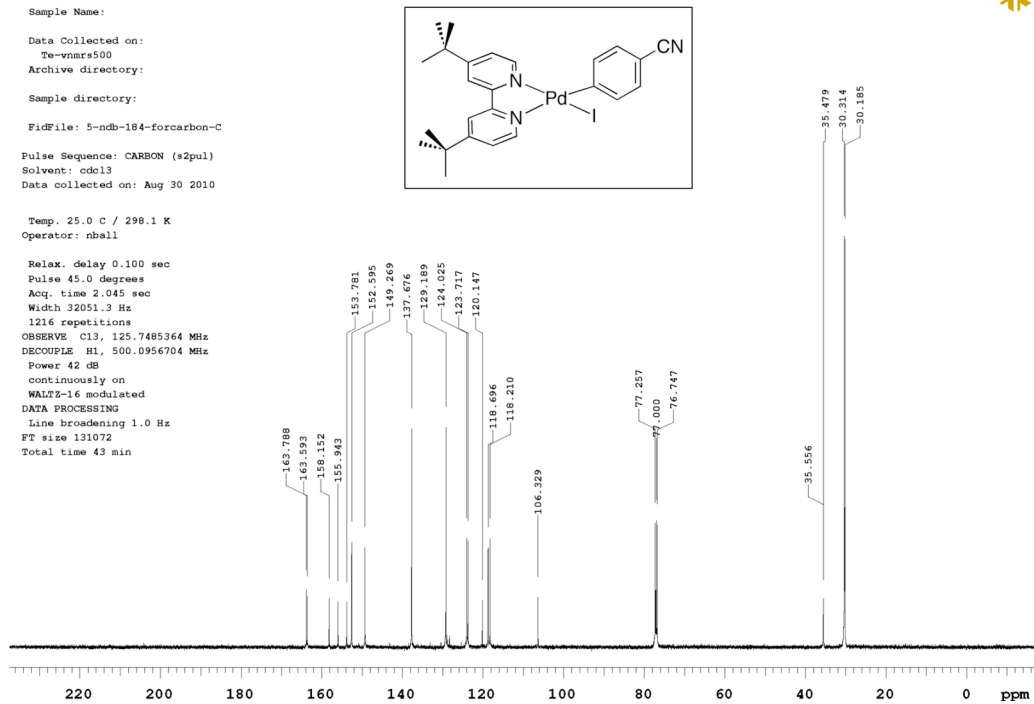

STANDARD PROTON PARAMETERS

Sample Name:  
 Data Collected on:  
 Co.Chem.LSA.UMich.edu-vnmrs400  
 Archive directory:  
 Sample directory:  
 FidFile: 4-ndb-255-otolforcarbon-H  
 Pulse Sequence: PROTON (s2pul)  
 Solvent: cdcl3  
 Data collected on: Oct 23 2009  
 Operator: nball  
 Relax. delay 0.500 sec  
 Pulse 45.0 degrees  
 Acq. time 3.500 sec  
 Width 6410.3 Hz  
 16 repetitions  
 OBSERVE H1, 400.5205751 MHz  
 DATA PROCESSING  
 Line broadening 0.3 Hz  
 FT size 65536  
 Total time 1 min 12 sec

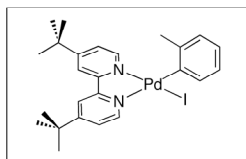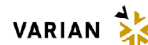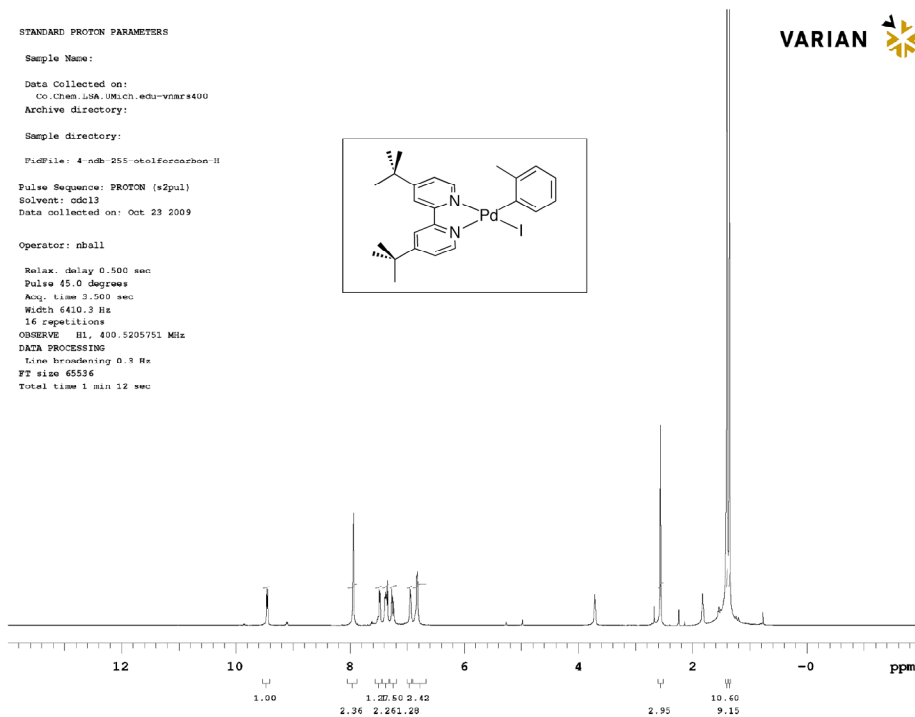

STANDARD CARBON PARAMETERS

Sample Name:  
 Data Collected on:  
 Co.Chem.LSA.UMich.edu-vnmrs400  
 Archive directory:  
 Sample directory:  
 FidFile: 4-ndb-255-otolforcarbon-C  
 Pulse Sequence: CARBON (s2pul)  
 Solvent: cdcl3  
 Data collected on: Oct 23 2009  
 Operator: nball  
 Relax. delay 0.100 sec  
 Pulse 45.0 degrees  
 Acq. time 2.569 sec  
 Width 25510.2 Hz  
 1120 repetitions  
 OBSERVE C13, 100.7109809 MHz  
 DECOUPLE H1, 400.5225704 MHz  
 Power 41 dB  
 continuously on  
 WALTZ-16 modulated  
 DATA PROCESSING  
 Line broadening 1.0 Hz  
 FT size 131072  
 Total time 49 min

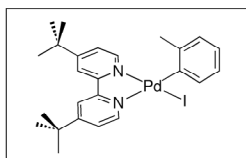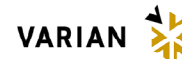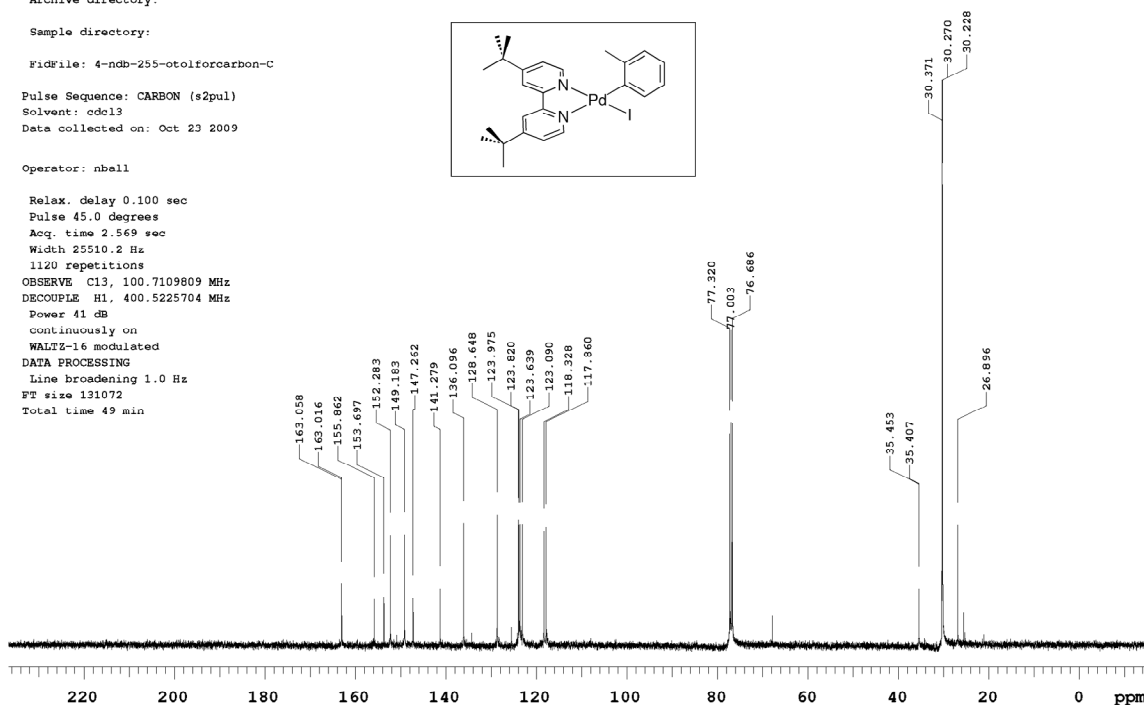

5-ndb-134forcarbon1132010-H

Sample Name:

Data Collected on:  
Co.Chem.LSA,UMich.edu-vnmrs400  
Archive directory:

Sample directory:

FidFile: 5-ndb-134forcarbon1132010-H

Pulse Sequence: PROTON (s2pul)  
Solvent: cdcl3  
Data collected on: Nov 3 2010

Operator: nbell

Relax. delay 0.500 sec  
Pulse 45.0 degrees  
Acq. time 3.500 sec  
Width 6410.3 Hz  
16 repetitions  
OBSERVE H1, 400.5206396 MHz  
DATA PROCESSING  
Line broadening 0.3 Hz  
FT size 65536  
Total time 1 min 12 sec

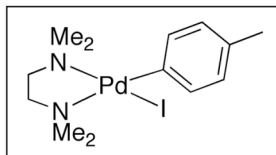

VARIAN 

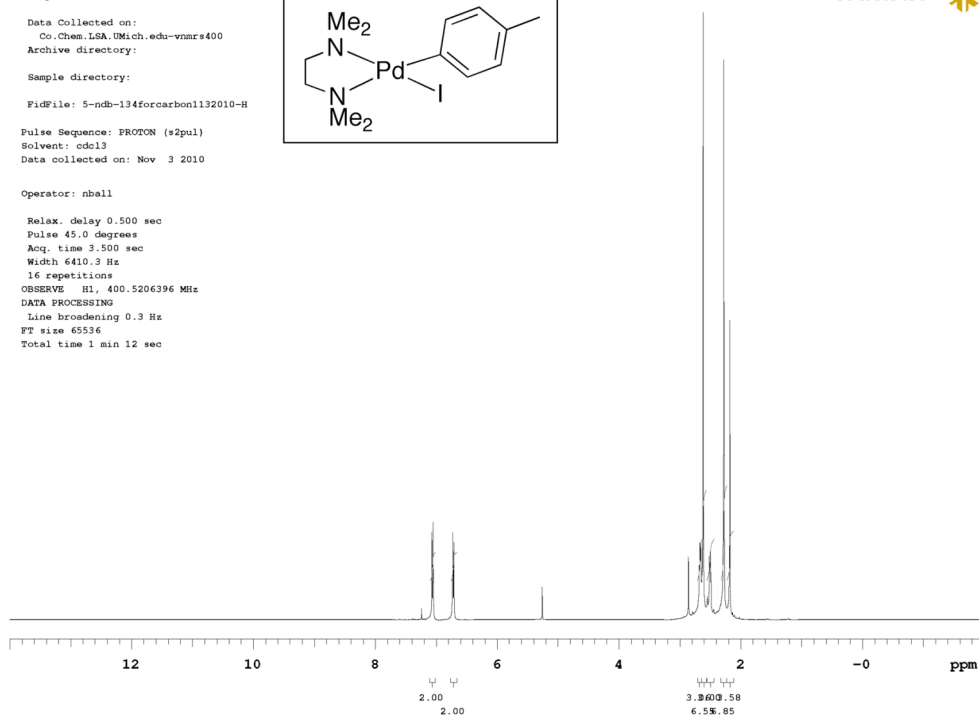

## STANDARD CARBON PARAMETERS

Sample Name:  
 Data Collected on:  
 Co.Chem.LSA.UMich.edu-vnmrs400  
 Archive directory:  
 Sample directory:  
 FidFile: 5-ndb-134forcarbon1132010-C  
 Pulse Sequence: CARBON (\*2pul)  
 Solvent: cdcl3  
 Data collected on: Nov 3 2010

Operator: nbhall  
 Relax. delay 0.100 sec  
 Pulse 45.0 degrees  
 Acq. time 2.569 sec  
 Width 25510.2 Hz  
 208 repetitions  
 OBSERVE C13, 100.7110052 MHz  
 DECOUPLE H1, 400.5226414 MHz  
 Power 41 dB  
 continuously on  
 WALTZ-16 modulated  
 DATA PROCESSING  
 Line broadening 1.0 Hz  
 FT size 131072  
 Total time 9 min 15 sec

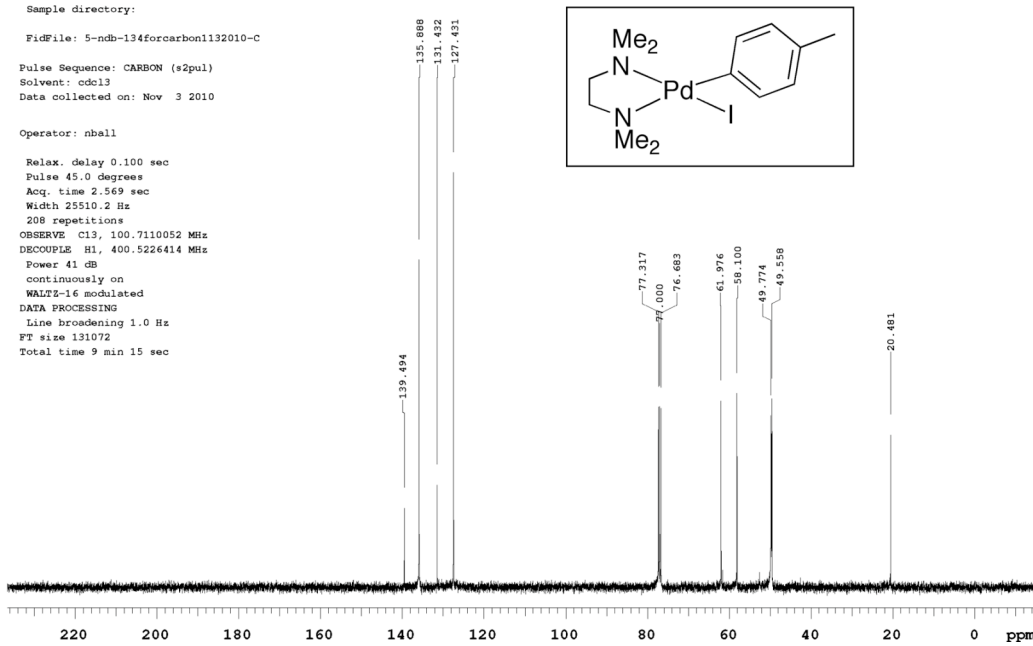

VARIAN

5-ndb-173-pOMe

Sample Name:  
 Data Collected on:  
 Te-vnmrs500  
 Archive directory:  
 Sample directory:  
 FidFile: 5-ndb-173-pOMe  
 Pulse Sequence: PROTON (\*2pul)  
 Solvent: cdcl3  
 Data collected on: Aug 24 2010

Temp. 25.0 C / 298.1 K  
 Operator: nbhall  
 Relax. delay 0.500 sec  
 Pulse 45.0 degrees  
 Acq. time 3.500 sec  
 Width 8012.8 Hz  
 16 repetitions  
 OBSERVE H1, 500.0931803 MHz  
 DATA PROCESSING  
 Line broadening 0.3 Hz  
 FT size 65536  
 Total time 1 min 12 sec

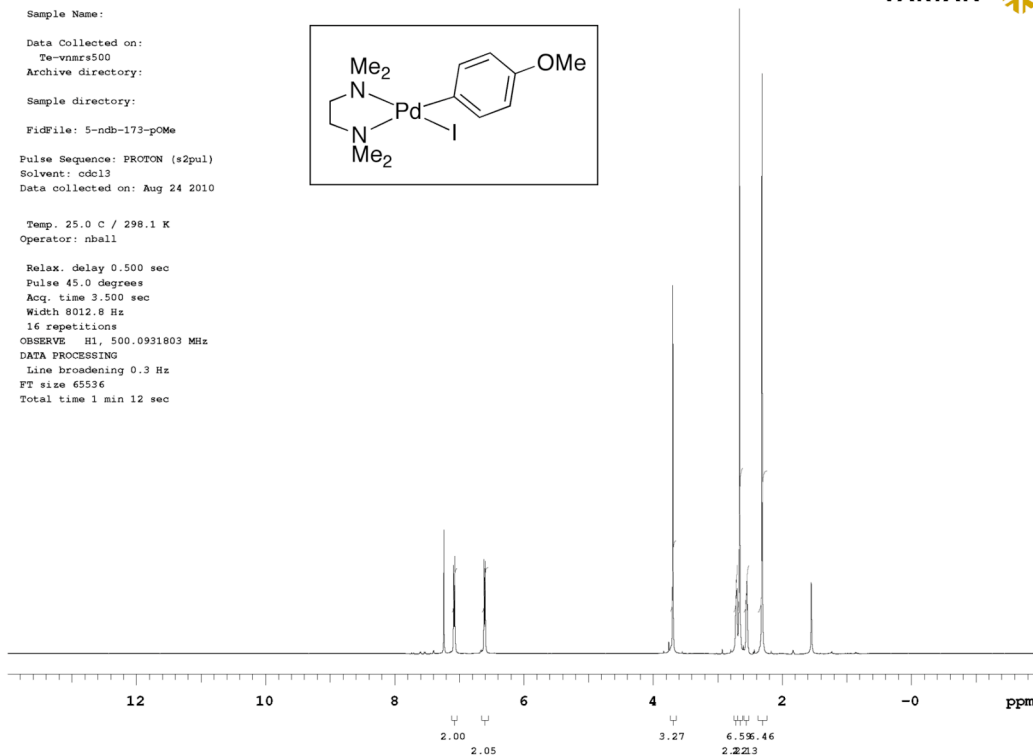

VARIAN

5-ndb-173-pOMe-C

Sample Name:

Data Collected on:  
Te-vnmrs500  
Archive directory:

Sample directory:

FidFile: 5-ndb-173-pOMe-C

Pulse Sequence: CARBON (\*2pul)  
Solvent: cdcl3  
Data collected on: Aug 24 2010

Temp. 25.0 C / 298.1 K  
Operator: nball

Relax. delay 0.100 sec  
Pulse 45.0 degrees  
Acq. time 2.045 sec  
Width 32051.3 Hz  
256 repetitions  
OBSERVE C13, 125.7485486 MHz  
DECOUPLE H1, 500.0956704 MHz  
Power 42 dB  
continuously on  
WALTZ-16 modulated  
DATA PROCESSING  
Line broadening 1.0 Hz  
FT size 131072  
Total time 9 min 11 sec

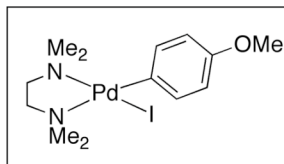

VARIAN

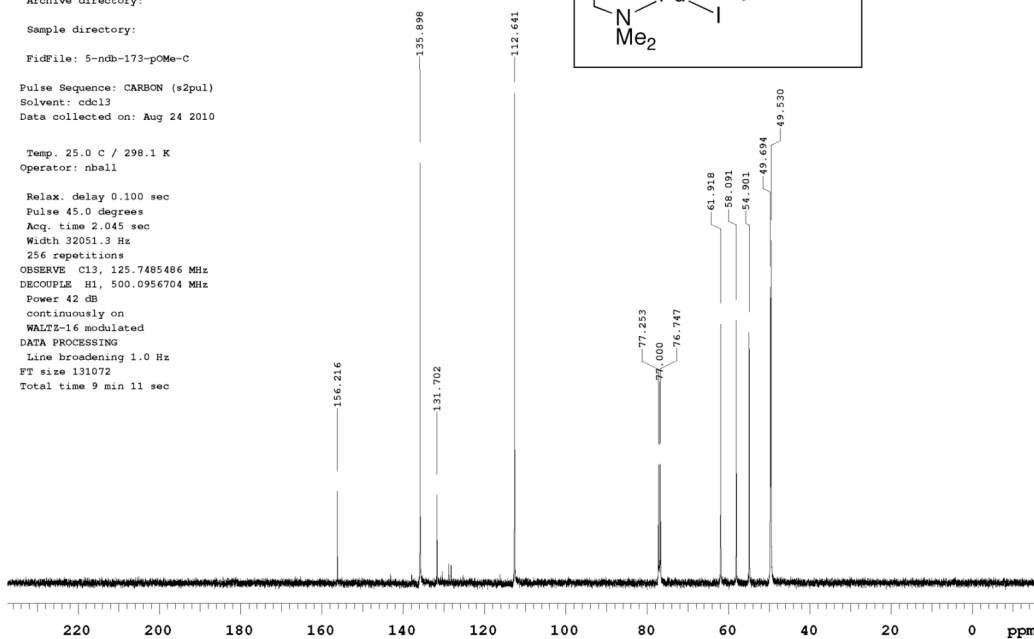

STANDARD PROTON PARAMETERS

Sample Name:

Data Collected on:  
Co.Chem.LSA.UMich.edu-vnmrs400  
Archive directory:

Sample directory:

FidFile: 5-ndb-133-forcarbon-H  
Pulse Sequence: PROTON (\*2pul)  
Solvent: cdcl3  
Data collected on: Sep 6 2010

Temp. 25.0 C / 298.1 K  
Operator: nball

Relax. delay 0.500 sec  
Pulse 45.0 degrees  
Acq. time 3.500 sec  
Width 6410.3 Hz  
16 repetitions  
OBSERVE H1, 400.5206388 MHz  
DATA PROCESSING  
Line broadening 0.3 Hz  
FT size 65536  
Total time 1 min 12 sec

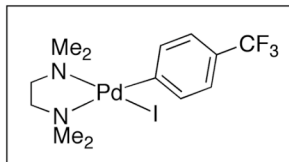

VARIAN

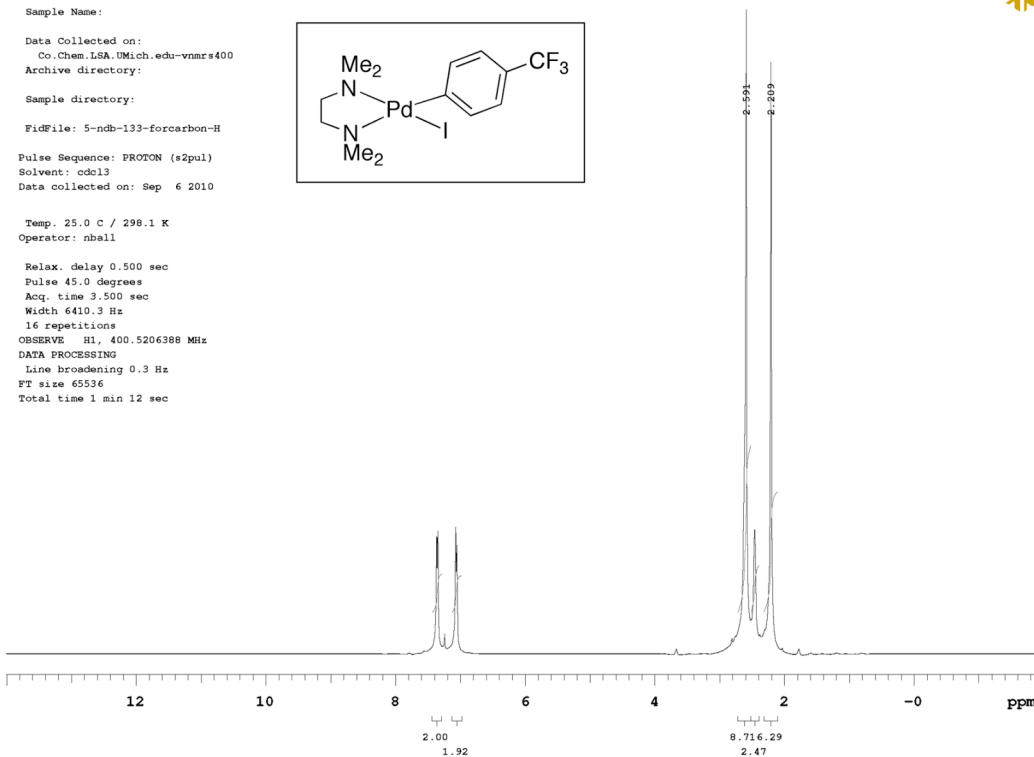

65-ndb-133-F

Sample Name:

Data Collected on:  
Co.Chem.LSA.UMich.edu-vnmrs400

Archive directory:

Sample directory:

FidFile: 5-ndb-133-F  
Pulse Sequence: FLUORINE (s2pul)  
Solvent: cdcl3  
Data collected on: Oct 29 2010

Operator: nball

Relax. delay 1.000 sec  
Pulse 30.0 degrees  
Acq. time 0.734 sec  
Width 89285.7 Hz  
16 repetitions  
OBSERVE F19, 376.8659351 MHz  
DATA PROCESSING  
Line broadening 1.5 Hz  
FT size 131072  
Total time 0 min 31 sec

VARIAN 

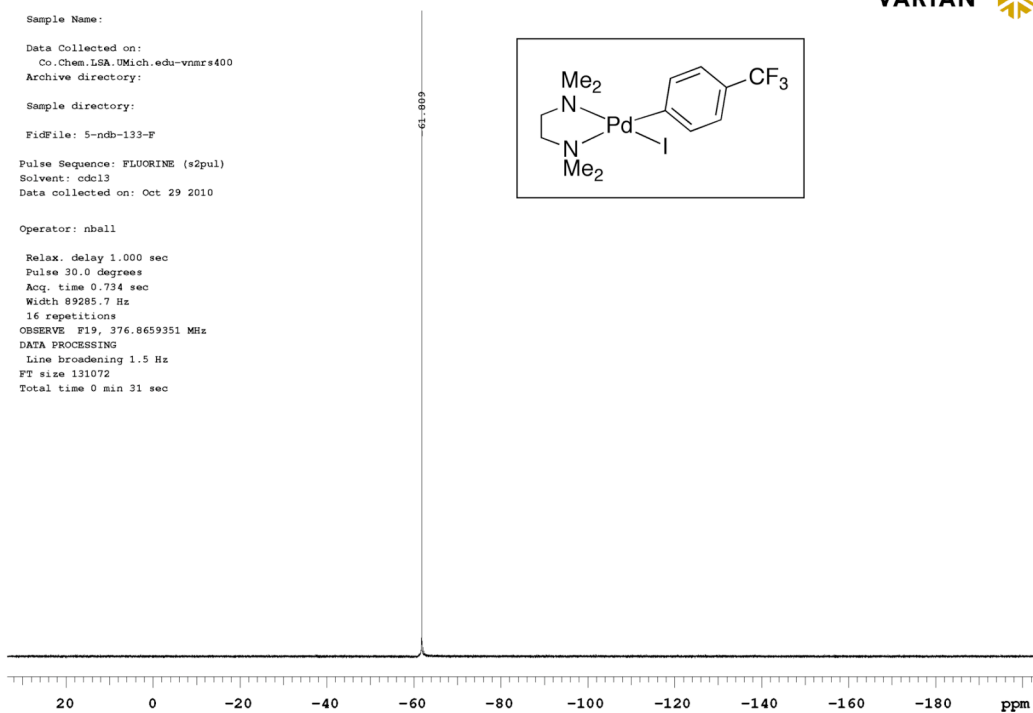

STANDARD CARBON PARAMETERS

Sample Name:

Data Collected on:  
Co.Chem.LSA.UMich.edu-vnmrs400

Archive directory:

Sample directory:

FidFile: 5-ndb-133-forcarbon-C

Pulse Sequence: CARBON (s2pul)  
Solvent: cdcl3  
Data collected on: Sep 6 2010

Temp. 25.0 C / 298.1 K  
Operator: nball

Relax. delay 0.100 sec  
Pulse 45.0 degrees  
Acq. time 2.569 sec  
Width 25510.2 Hz  
2208 repetitions  
OBSERVE C13, 100.7110145 MHz  
DECOUPLE H1, 400.5226414 MHz  
Power 41 dB  
continuously on  
WALTZ-16 modulated  
DATA PROCESSING  
Line broadening 1.0 Hz  
FT size 131072  
Total time 1 hr, 38 min

VARIAN 

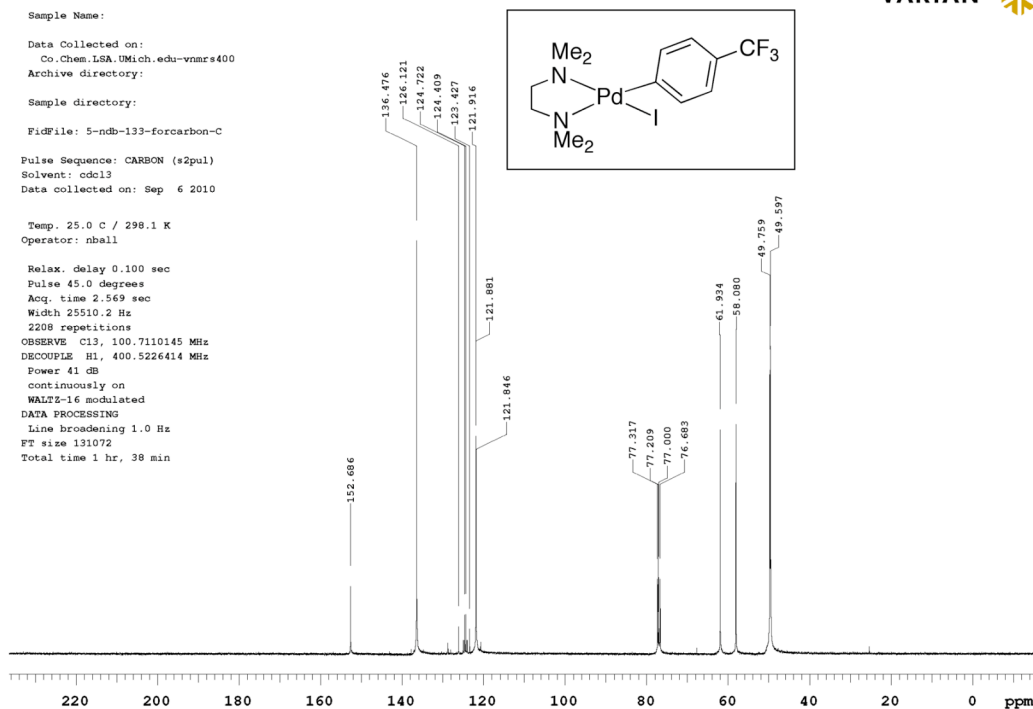



## STANDARD CARBON PARAMETERS

Sample Name:  
 Data Collected on:  
 Co. Chem. LSA, UMich.edu-vnmrs400  
 Archive directory:  
 Sample directory:  
 FidFile: 5-ndb-133-Forcarbon-C  
 Pulse Sequence: CARBON (s2pul)  
 Solvent: cdcl3  
 Data collected on: Sep 6 2010

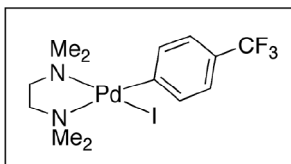

VARIAN

Temp. 25.0 C / 298.1 K  
 Operator: nball

Relax. delay 0.100 sec  
 Pulse 45.0 degrees  
 Acq. time 2.569 sec  
 Width 25510.2 Hz  
 2208 repetitions  
 OBSERVE C13, 100.7110145 MHz  
 DECOUPLE H1, 400.5226414 MHz  
 Power 41 dB  
 continuously on  
 WALTZ-16 modulated  
 DATA PROCESSING  
 Line broadening 1.0 Hz  
 FT size 131072  
 Total time 1 hr, 38 min

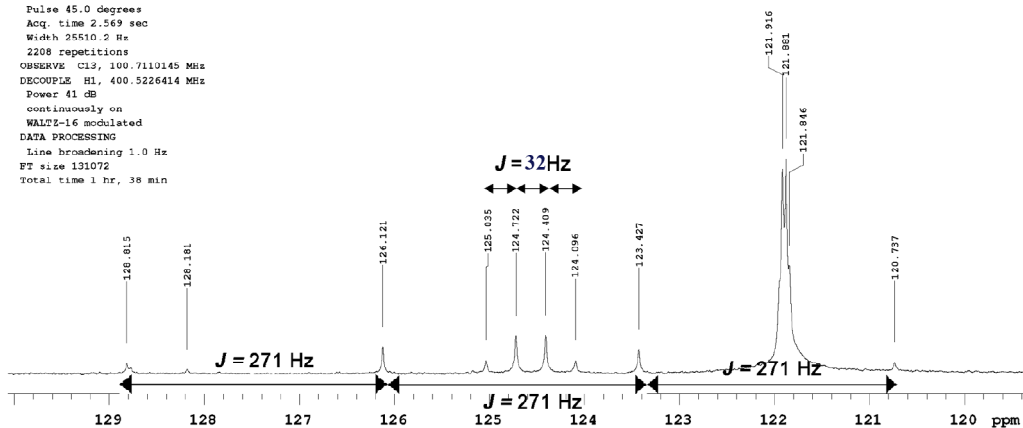

## STANDARD PROTON PARAMETERS

Sample Name:  
 Data Collected on:  
 Co. Chem. LSA, UMich.edu-vnmrs400  
 Archive directory:  
 Sample directory:  
 FidFile: 5-ndb-203forcarbon-H  
 Pulse Sequence: PROTON (s2pul)  
 Solvent: cdcl3  
 Data collected on: Sep 14 2010

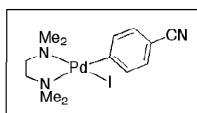

VARIAN

Temp. 25.0 C / 298.1 K  
 Operator: nball

Relax. delay 0.500 sec  
 Pulse 45.0 degrees  
 Acq. time 3.500 sec  
 Width 6410.3 Hz  
 16 repetitions  
 OBSERVE H1, 400.5206320 MHz  
 DATA PROCESSING  
 Line broadening 0.3 Hz  
 FT size 65536  
 Total time 1 min 12 sec

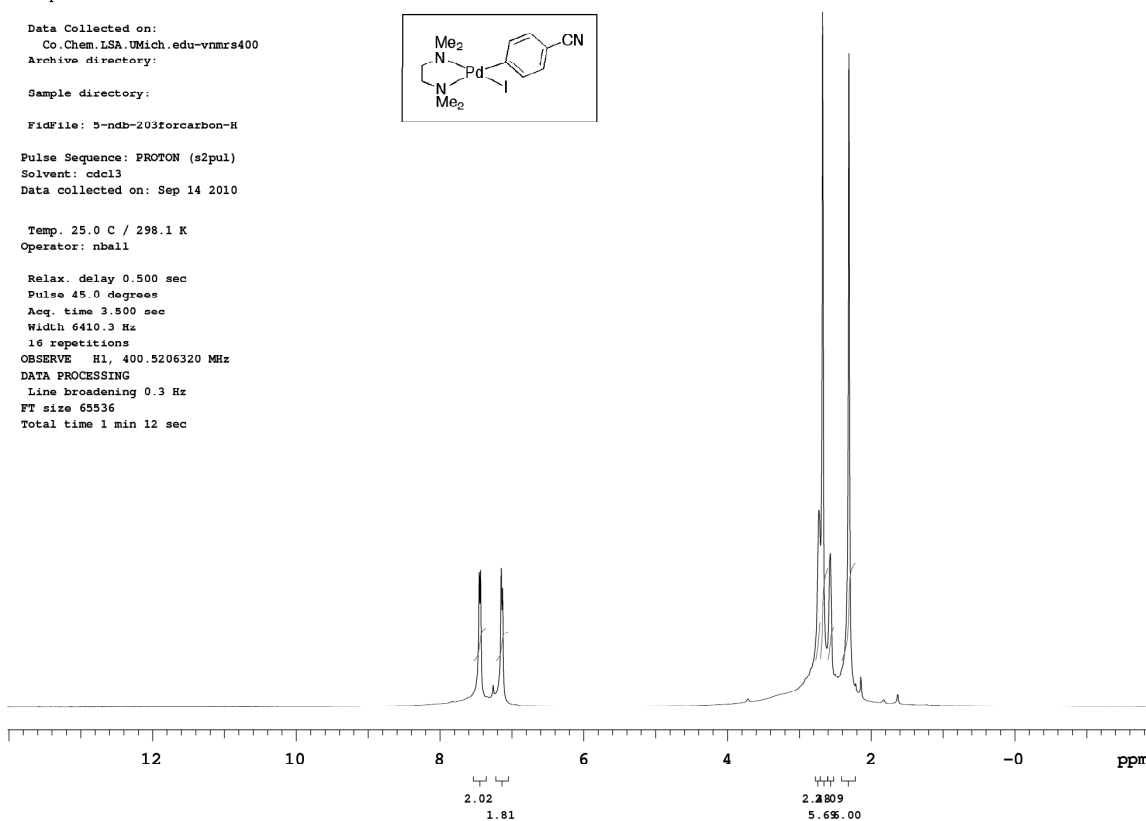

5-ndb-203forcarbon-C

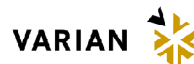

Sample Name:

Data Collected on:  
Co. Chem. LSA.UMich.edu-vmnms400  
Archive directory:

Sample directory:

FidFile: 5-ndb-203forcarbon-C

Pulse Sequence: CARBON (s2pul)  
Solvent: cdcl3  
Data collected on: Sep 14 2010

Temp. 25.0 C / 298.1 K  
Operator: nbll

Relax. delay 0.100 sec  
Pulse 45.0 degrees  
Acq. time 2.569 sec  
Width 25510.2 Hz  
336 repetitions  
OBSERVE c13, 100.7110048 MHz  
DECOUPLE H1, 400.5226414 MHz  
Power 41 dB  
continuously on  
WALTZ-16 modulated  
DATA PROCESSING  
Line broadening 1.0 Hz  
FT size 131072  
Total time 15 min

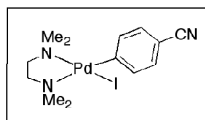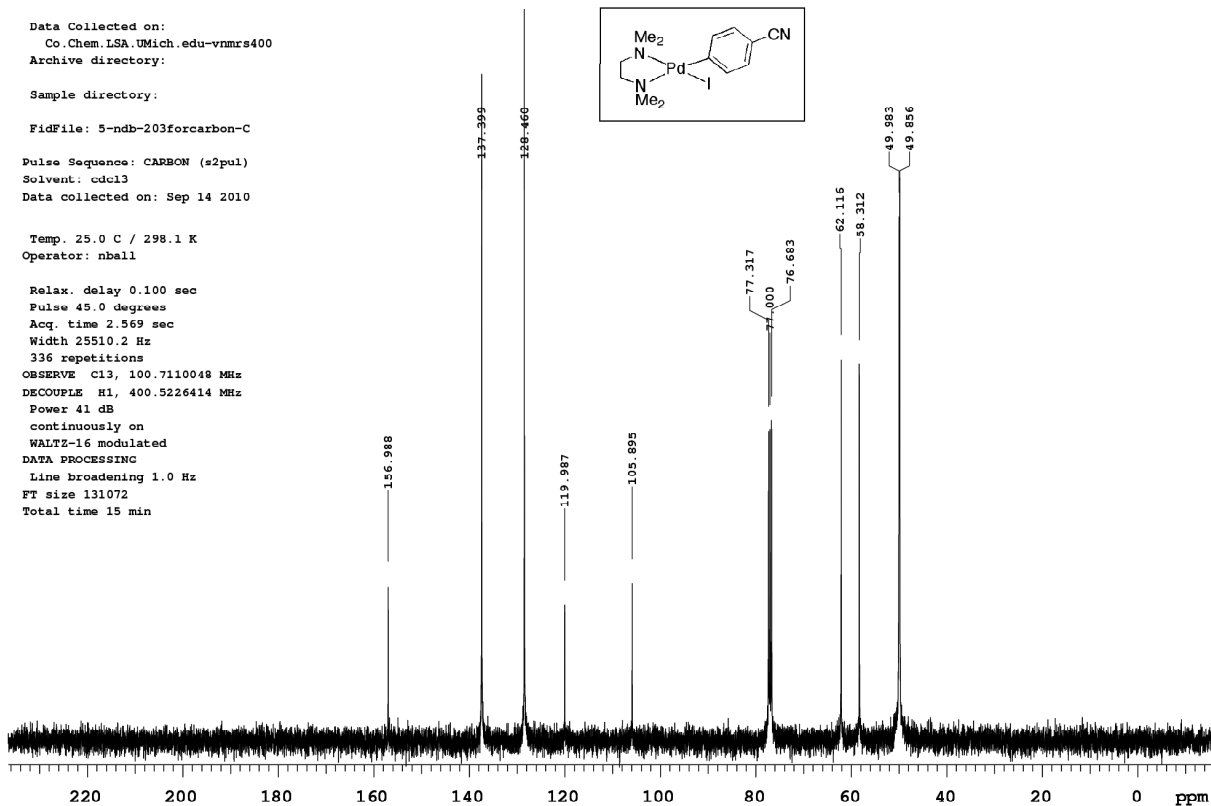

## STANDARD PROTON PARAMETERS

Sample Name:  
 Data Collected on:  
 Co.Chem.LSA,UMich.edu-vnmrs400  
 Archive directory:  
 Sample directory:  
 FidFile: 5-ndb-171forcarbon-H  
 Pulse Sequence: PROTON (s2pul)  
 Solvent: cdcl3  
 Data collected on: Oct 12 2010

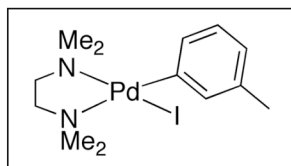

VARIAN 

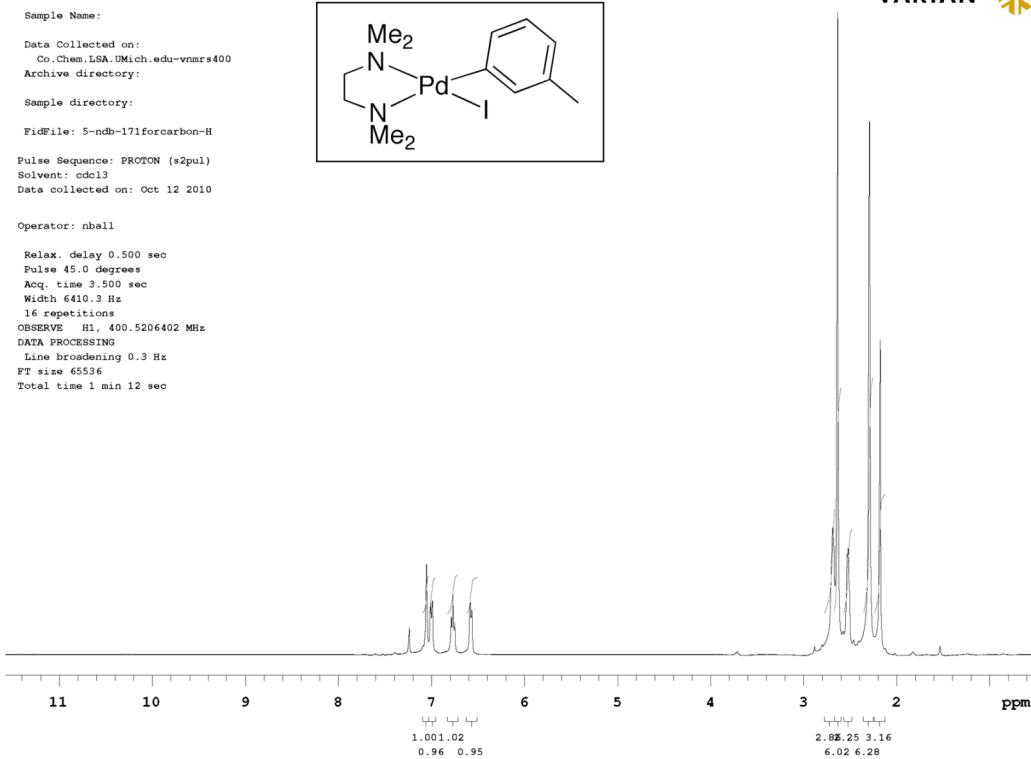

## STANDARD CARBON PARAMETERS

Sample Name:  
 Data Collected on:  
 Co.Chem.LSA,UMich.edu-vnmrs400  
 Archive directory:  
 Sample directory:  
 FidFile: 5-ndb-171forcarbon-C  
 Pulse Sequence: CARBON (s2pul)  
 Solvent: cdcl3  
 Data collected on: Oct 12 2010

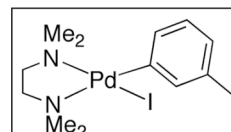

VARIAN 

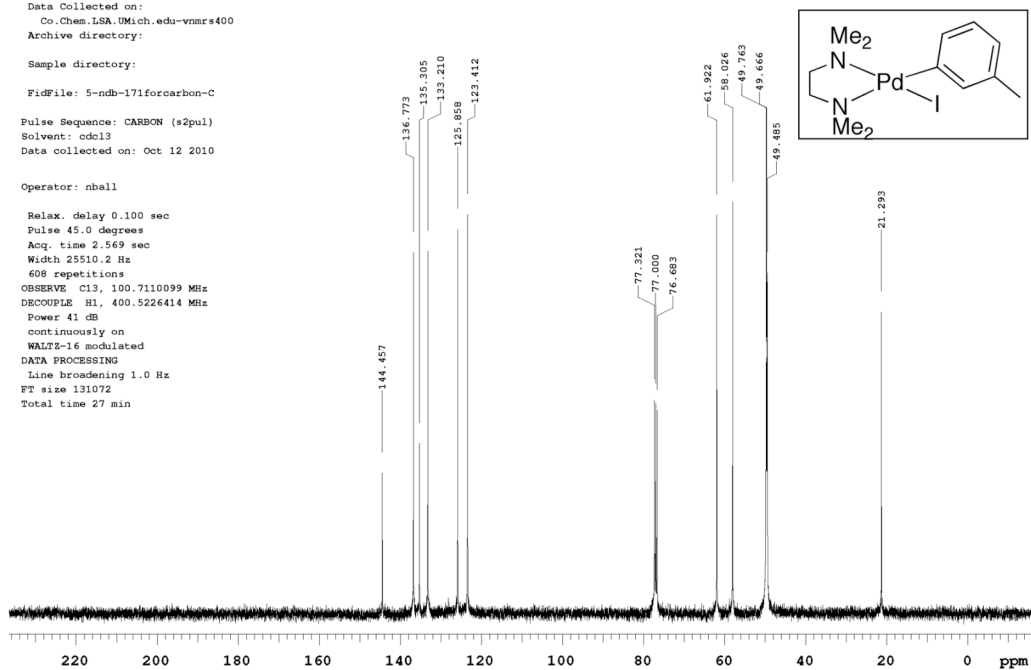

## STANDARD PROTON PARAMETERS

Sample Name:  
 Data Collected on:  
 Co.Chem.LSA.UMich.edu-vnmrs400  
 Archive directory:  
 Sample directory:  
 FidFile: 5-ndb-104forcarbon-H  
 Pulse Sequence: PROTON (s2pul)  
 Solvent: cdcl3  
 Data collected on: Sep 8 2010

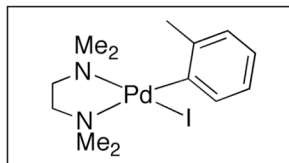

VARIAN

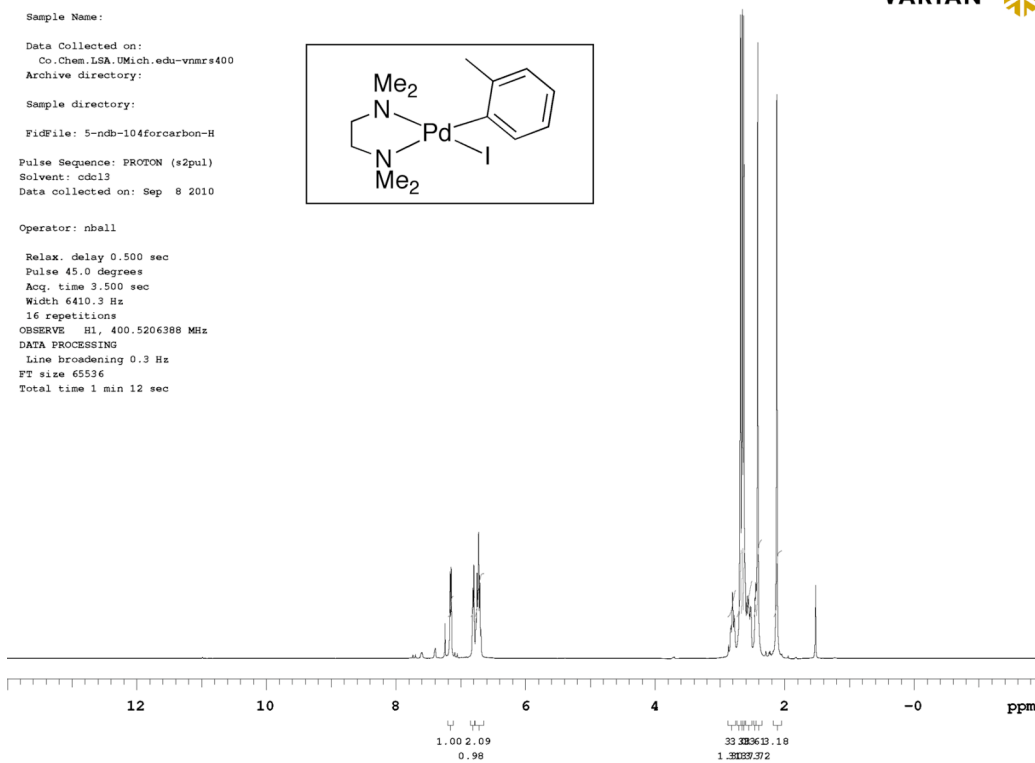

## STANDARD CARBON PARAMETERS

Sample Name:  
 Data Collected on:  
 Co.Chem.LSA.UMich.edu-vnmrs400  
 Archive directory:  
 Sample directory:  
 FidFile: 5-ndb-104forcarbon  
 Pulse Sequence: CARBON (s2pul)  
 Solvent: cdcl3  
 Data collected on: Sep 8 2010

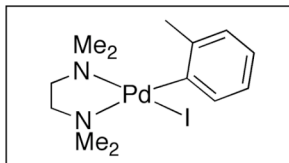

VARIAN

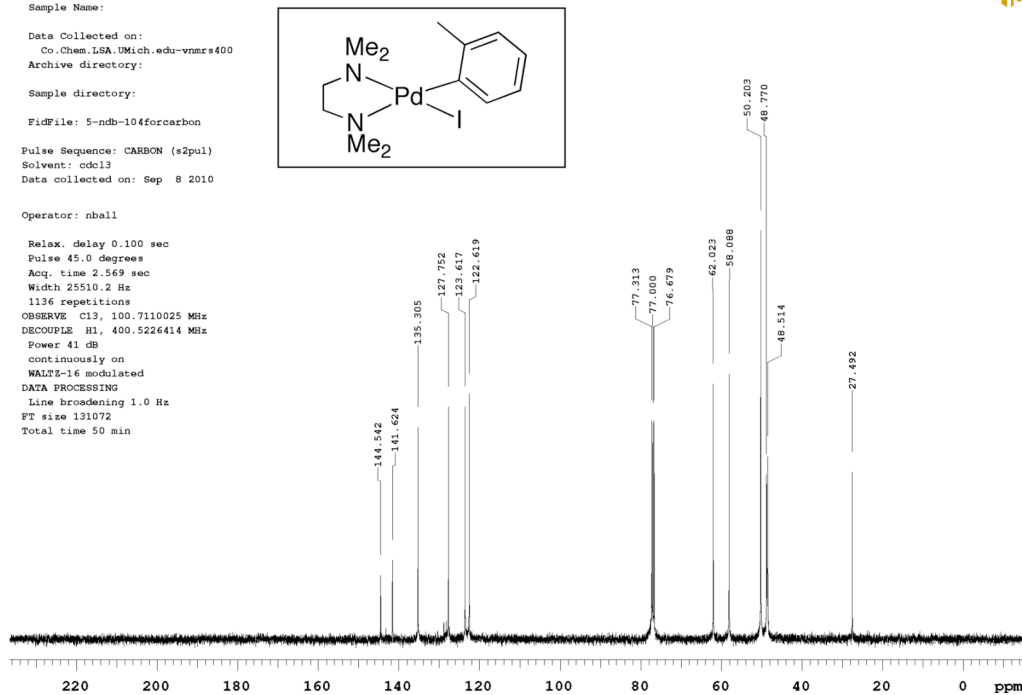

## STANDARD PROTON PARAMETERS

Sample Name:  
 Data Collected on:  
 Co.Chem.LSA.UMich.edu-vnmr#400  
 Archive directory:  
 Sample directory:  
 FidFile: 5-ndb-177-forcarbon-o-OMePdI-H  
 Pulse Sequence: PROTON (s2pul)  
 Solvent: cdc13  
 Data collected on: Oct 12 2010  
 Operator: nball  
 Relax. delay 0.500 sec  
 Pulse 45.0 degrees  
 Acq. time 3.500 sec  
 Width 4410.3 Hz  
 16 repetitions  
 OBSERVE H1, 400.5206388 MHz  
 DATA PROCESSING  
 Line broadening 0.3 Hz  
 FT size 65536  
 Total time 1 min 12 sec

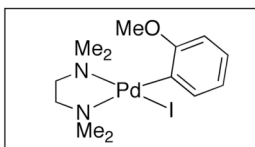

VARIAN

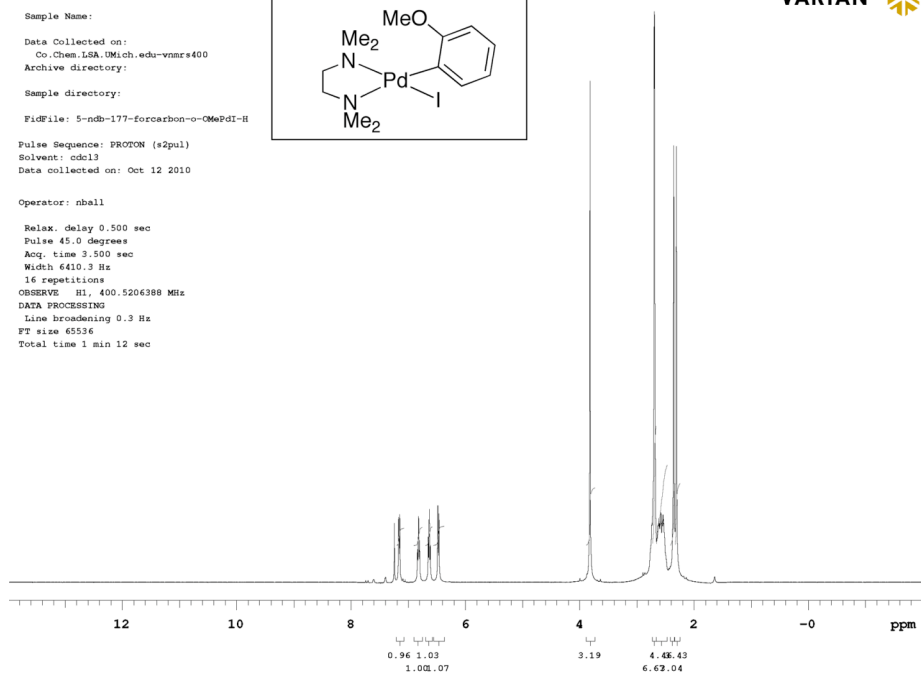

## STANDARD CARBON PARAMETERS

Sample Name:  
 Data Collected on:  
 Co.Chem.LSA.UMich.edu-vnmr#400  
 Archive directory:  
 Sample directory:  
 FidFile: 5-ndb-177-forcarbon-o-OMePdI-C  
 Pulse Sequence: CARBON (s2pul)  
 Solvent: cdc13  
 Data collected on: Oct 12 2010  
 Operator: nball  
 Relax. delay 0.100 sec  
 Pulse 45.0 degrees  
 Acq. time 2.569 sec  
 Width 25510.2 Hz  
 544 repetitions  
 OBSERVE C13, 100.7110048 MHz  
 DECOUPLE H1, 400.5226414 MHz  
 Power 41 dB  
 continuously on  
 WALTZ-16 modulated  
 DATA PROCESSING  
 Line broadening 1.0 Hz  
 FT size 131072  
 Total time 24 min

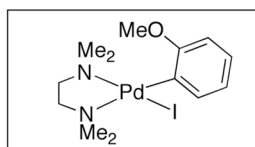

VARIAN

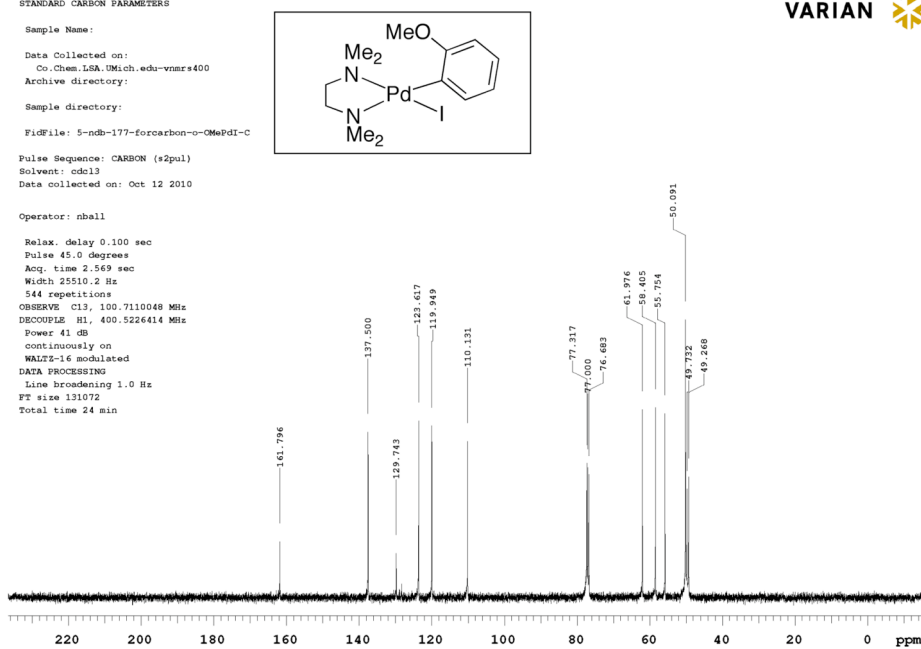

5-ndb-185-H

Sample Name:

Data Collected on:

Te-vnmrs500

Archive directory:

Sample directory:

FidFile: 5-ndb-185-H

Pulse Sequence: PROTON (s2pul)

Solvent: cdcl3

Data collected on: Aug 30 2010

Temp. 25.0 C / 298.1 K

Operator: nball

Relax. delay 0.500 sec

Pulse 45.0 degrees

Acq. time 3.500 sec

Width 8012.8 Hz

16 repetitions

OBSERVE H1, 500.0931800 MHz

DATA PROCESSING

Line broadening 0.3 Hz

FT size 65536

Total time 1 min 12 sec

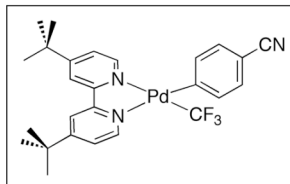

VARIAN

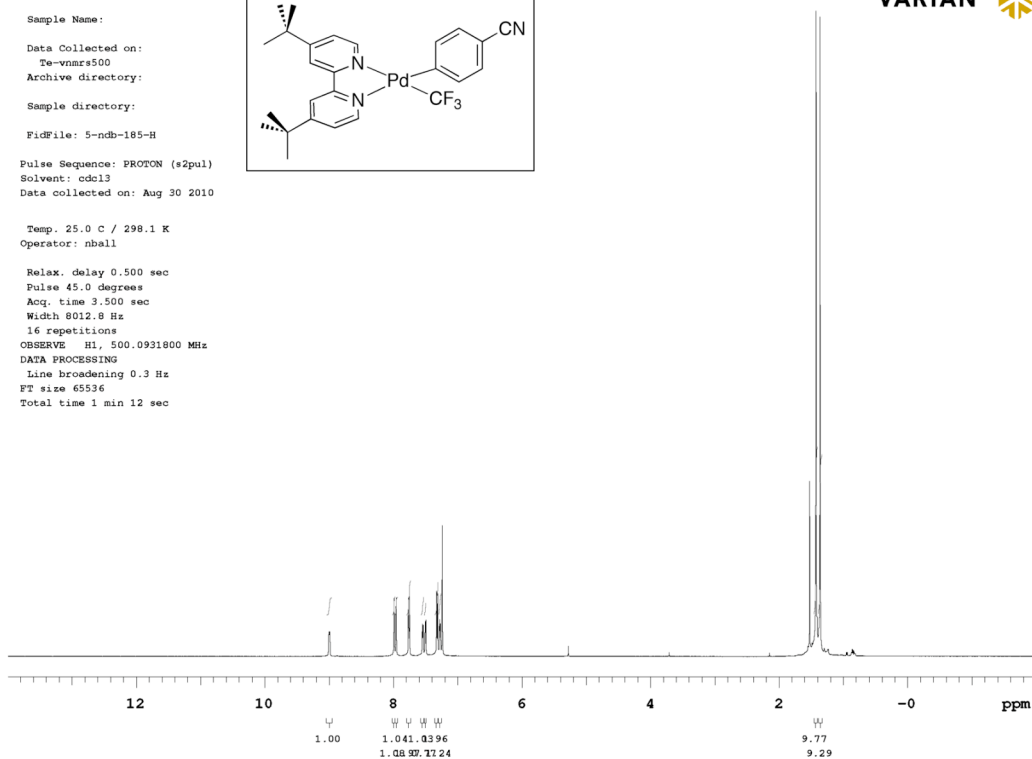

5-ndb-185-forcarbon-F

Sample Name:

Data Collected on:

Te-vnmrs500

Archive directory:

Sample directory:

FidFile: 5-ndb-185-forcarbon-F

Pulse Sequence: FLUORINE (s2pul)

Solvent: cdcl3

Data collected on: Aug 30 2010

Temp. 25.0 C / 298.1 K

Operator: nball

Relax. delay 1.000 sec

Pulse 30.0 degrees

Acq. time 0.603 sec

Width 108.7 kHz

16 repetitions

OBSERVE F19, 470.5577318 MHz

DATA PROCESSING

Line broadening 1.5 Hz

FT size 131072

Total time 0 min 29 sec

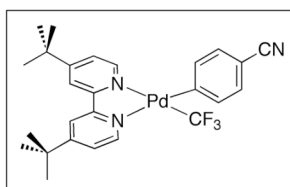

VARIAN

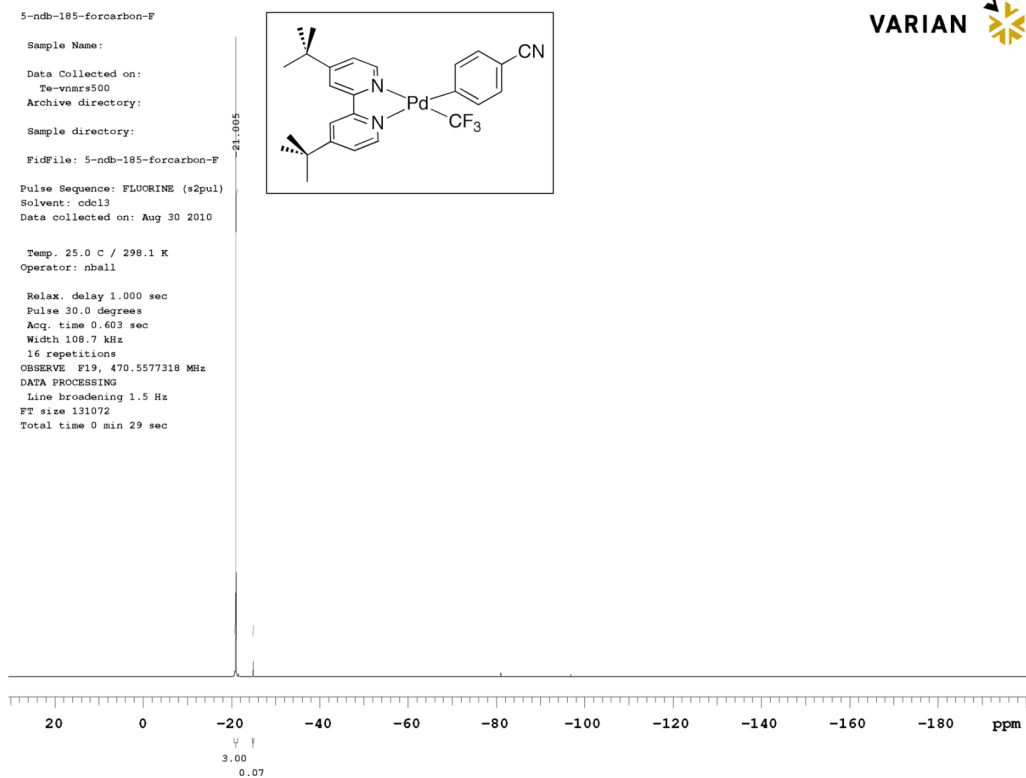

5-ndb-185-forcarbon  
 Sample Name:  
 Data Collected on:  
 Co.Chem.LSA.UMich.edu-vnmrs400  
 Archive directory:  
 Sample directory:  
 FidFile: 5-ndb-185-forcarbon  
 Pulse Sequence: CARBON (s2pul)  
 Solvent: cdcl3  
 Data collected on: Oct 25 2010  
 Operator: nbll  
 Relax. delay 0.100 sec  
 Pulse 45.0 degrees  
 Acq. time 2.569 sec  
 Width 25510.2 Hz  
 2176 repetitions  
 OBSERVE C13, 100.7109959 MHz  
 DECOUPLE H1, 400.5226414 MHz  
 Power 41 dB  
 continuously on  
 WALTZ-16 modulated  
 DATA PROCESSING  
 Line broadening 2.0 Hz  
 FT size 131072  
 Total time 1 hr, 37 min

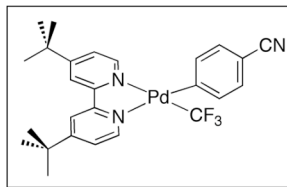

VARIAN

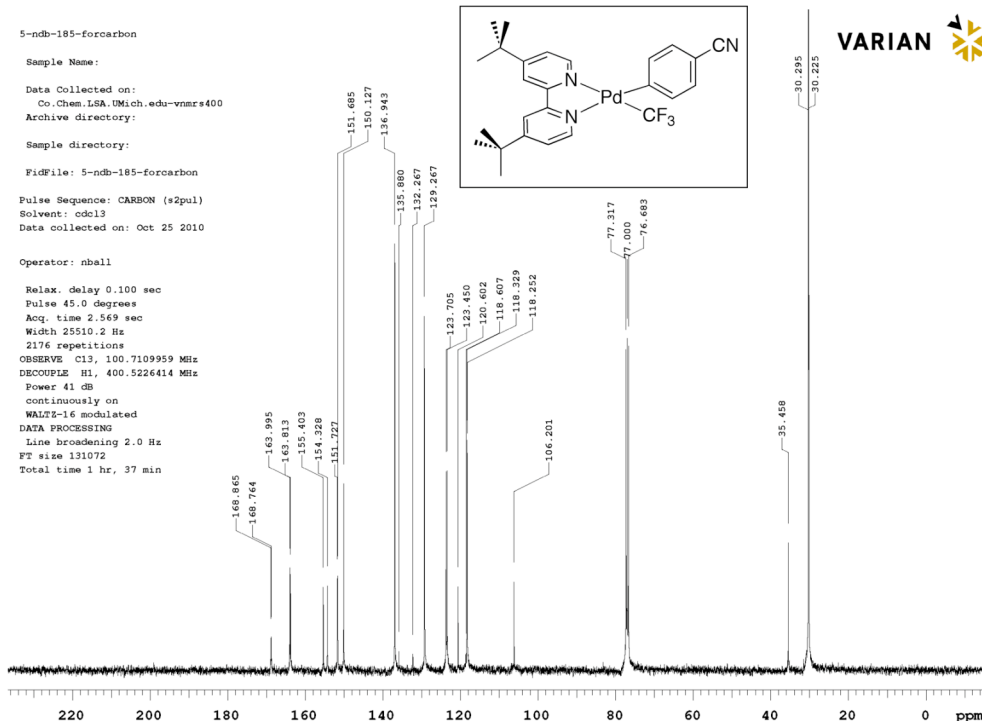

5-ndb-185-forcarbon  
 Sample Name:  
 Data Collected on:  
 Co.Chem.LSA.UMich.edu-vnmrs400  
 Archive directory:  
 Sample directory:  
 FidFile: 5-ndb-185-forcarbon  
 Pulse Sequence: CARBON (s2pul)  
 Solvent: cdcl3  
 Data collected on: Oct 25 2010  
 Operator: nbll  
 Relax. delay 0.100 sec  
 Pulse 45.0 degrees  
 Acq. time 2.569 sec  
 Width 25510.2 Hz  
 2176 repetitions  
 OBSERVE C13, 100.7109959 MHz  
 DECOUPLE H1, 400.5226414 MHz  
 Power 41 dB  
 continuously on  
 WALTZ-16 modulated  
 DATA PROCESSING  
 Line broadening 1.0 Hz  
 FT size 131072  
 Total time 1 hr, 37 min

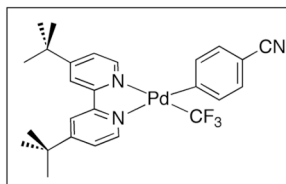

VARIAN

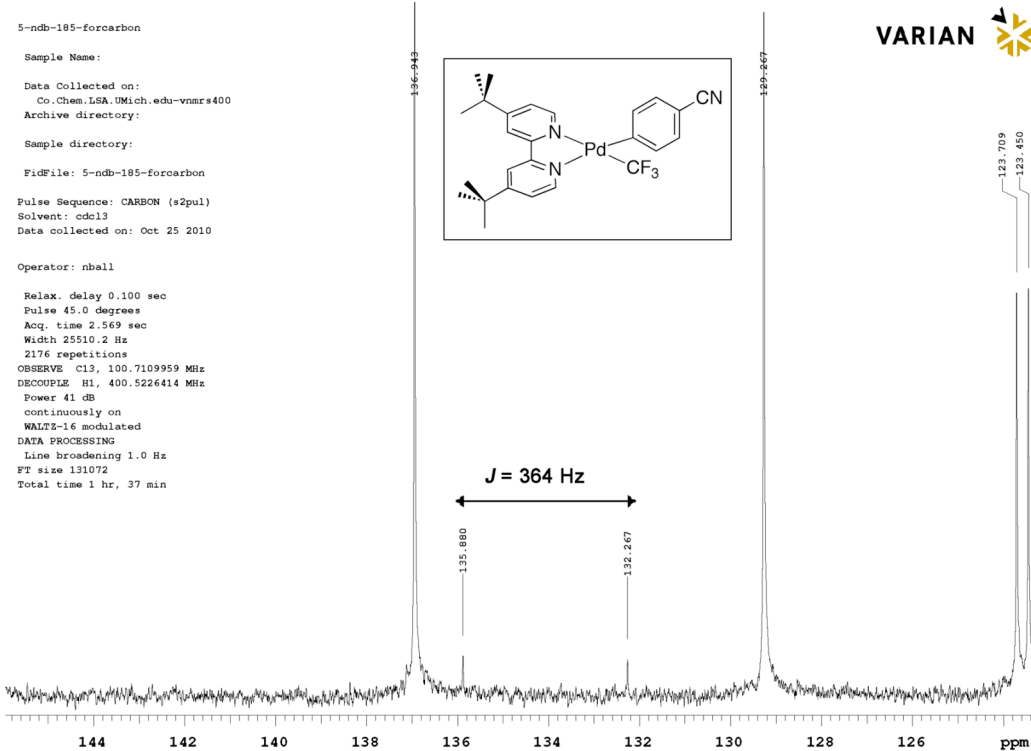

5-ndb-125-H

Sample Name:  
Data Collected on:  
Zr.Chem.LSA.UMich.edu-inova400  
Archive directory:  
Sample directory:  
FidFile: 5-ndb-125-H  
Pulse Sequence: PROTON (s2pul)  
Solvent: cdcl3  
Data collected on: Jun 22 2010

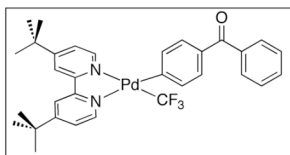

VARIAN 

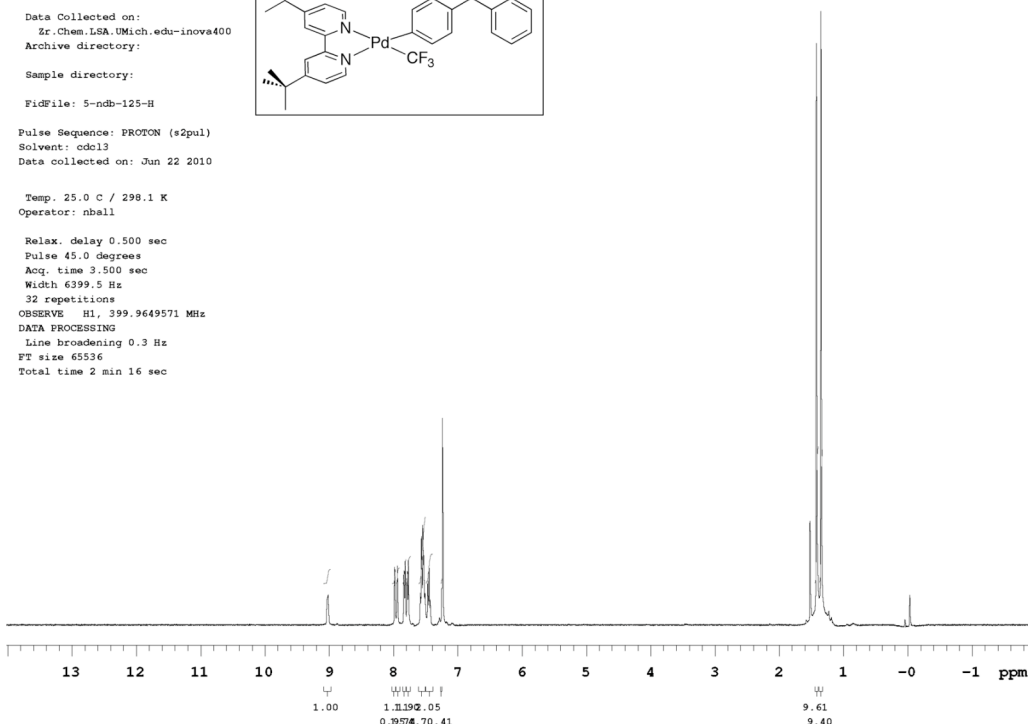

STANDARD PROTON PARAMETERS

Sample Name:  
Data Collected on:  
Zr.Chem.LSA.UMich.edu-inova400  
Archive directory:  
Sample directory:  
FidFile: 5-ndb-125-F  
Pulse Sequence: FLUORINE (s2pul)  
Solvent: cdcl3  
Data collected on: Jun 22 2010

Temp. 25.0 C / 298.1 K  
Operator: nball

Relax. delay 1.000 sec  
Pulse 30.0 degrees  
Acq. time 0.757 sec  
Width 86580.1 Hz  
64 repetitions  
OBSERVE F19, 376.3430691 MHz  
DATA PROCESSING  
Line broadening 0.5 Hz  
FT size 131072  
Total time 1 min 57 sec

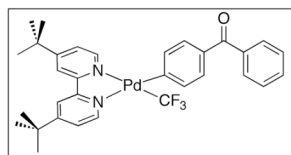

VARIAN 

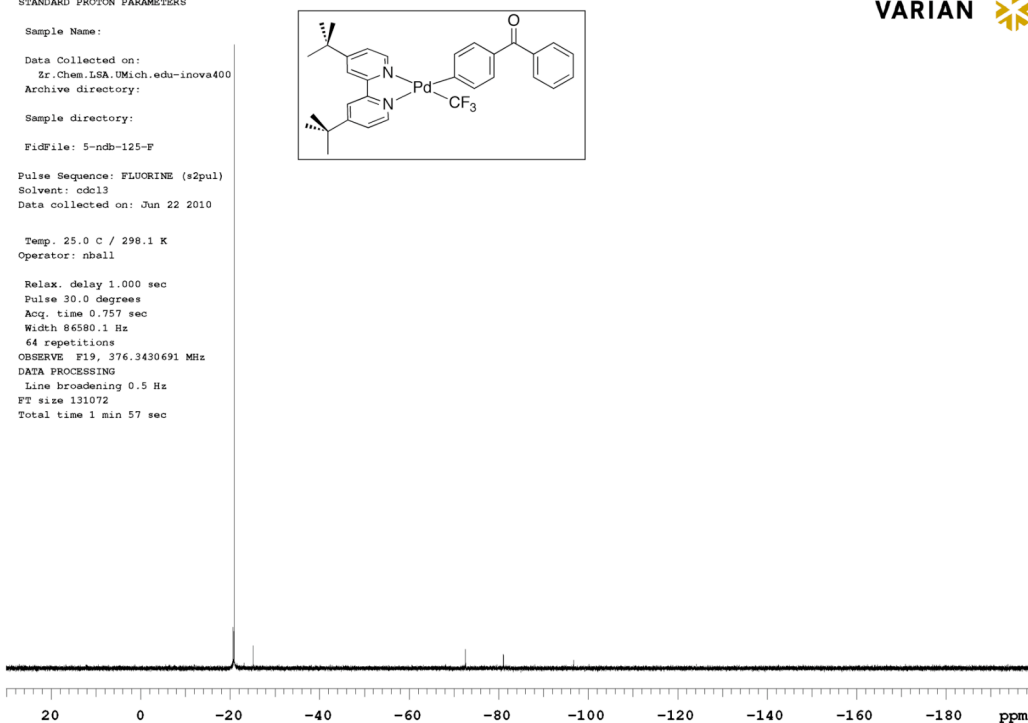



## STANDARD CARBON PARAMETERS

Sample Name:  
 Data Collected on:  
 Co.Chem.LSA.UMich.edu-vnmrs400  
 Archive directory:  
 Sample directory:  
 FidFile: 5-ndb-129-forcarbon-C  
 Pulse Sequence: CARBON (s2pul)  
 Solvent: cdcl3  
 Data collected on: Jun 22 2010

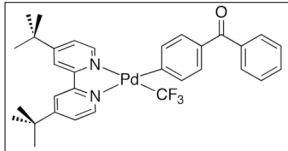

VARIAN

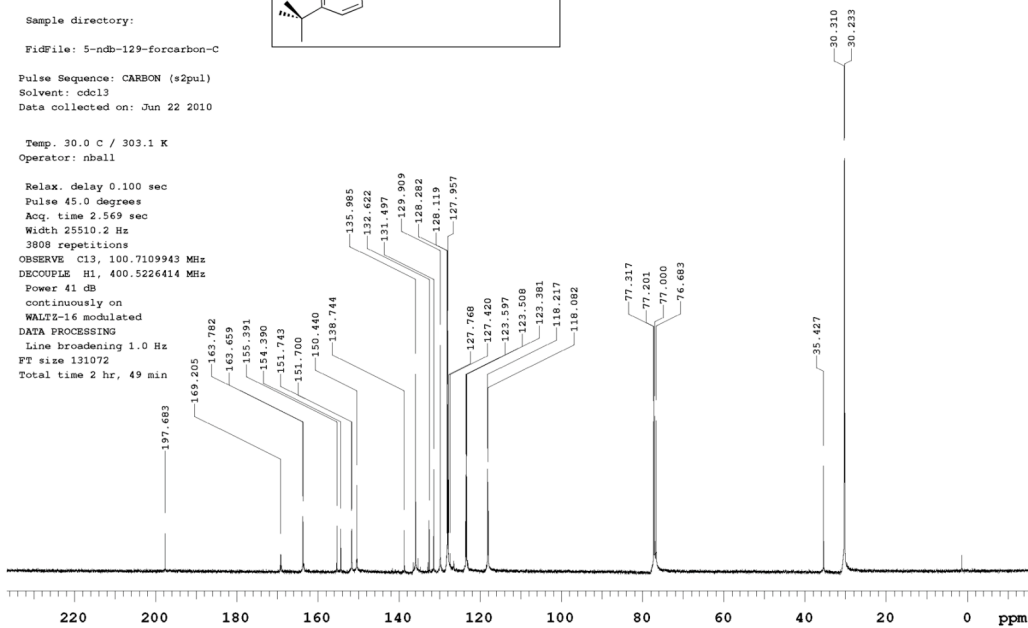

## STANDARD CARBON PARAMETERS

Sample Name:  
 Data Collected on:  
 Co.Chem.LSA.UMich.edu-vnmrs400  
 Archive directory:  
 Sample directory:  
 FidFile: 5-ndb-129-forcarbon-C  
 Pulse Sequence: CARBON (s2pul)  
 Solvent: cdcl3  
 Data collected on: Jun 22 2010

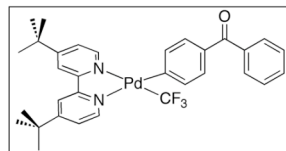

VARIAN

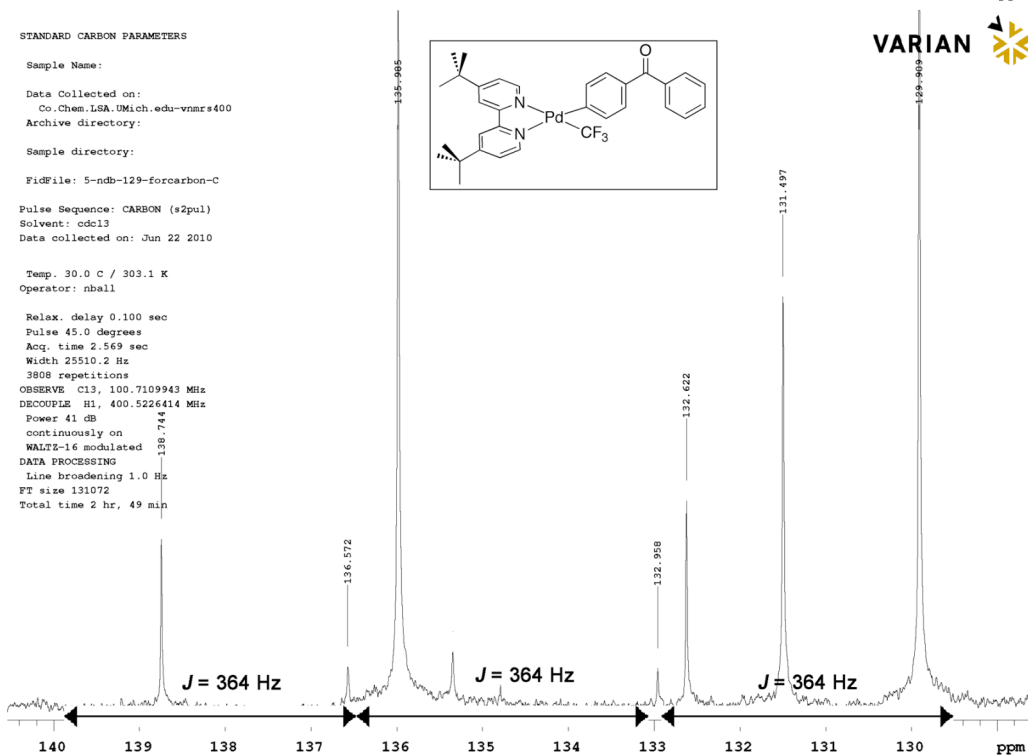

## STANDARD PROTON PARAMETERS

Sample Name:  
 Data Collected on:  
 Co.Chem.LSA.UMich.edu-vnmr#400  
 Archive directory:  
 Sample directory:  
 FidFile: 5-ndb-51-forcarbon-H  
 Pulse Sequence: PROTON (s2pul)  
 Solvent: cdcl3  
 Date collected on: Feb 19 2010  
 Operator: nball  
 Relax. delay 0.500 sec  
 Pulse 45.0 degrees  
 Acq. time 3.500 sec  
 Width 6410.3 Hz  
 16 repetitions  
 OBSERVE H1, 400.5205678 MHz  
 DATA PROCESSING  
 Line broadening 0.3 Hz  
 FT size 65536  
 Total time 1 min 12 sec

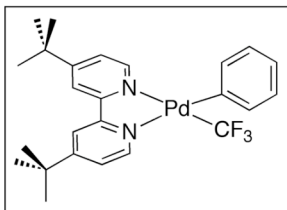

VARIAN

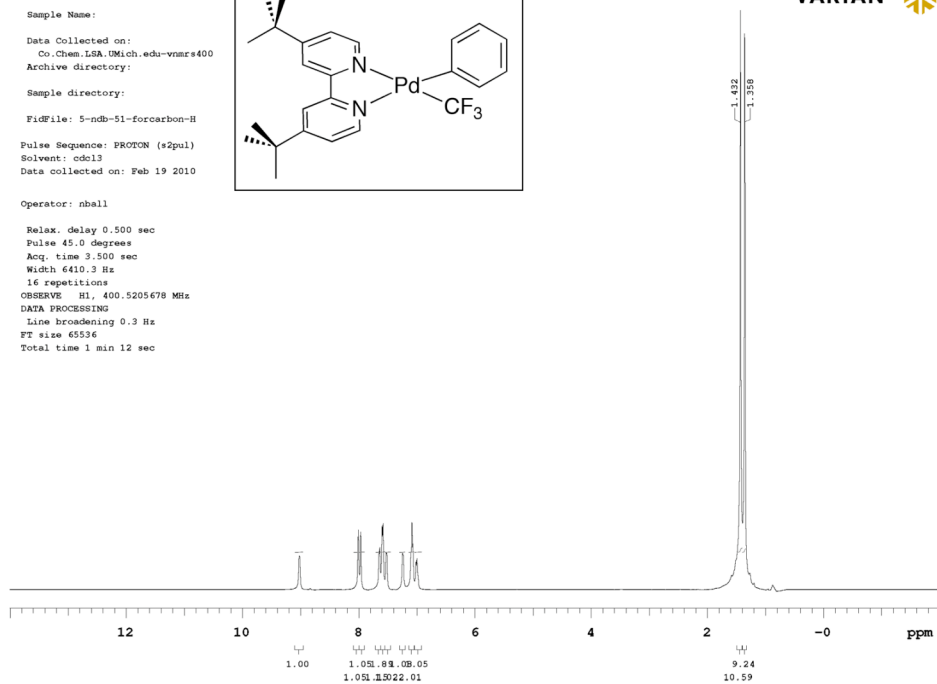

## 5-ndb-51-forcarbon-F

Sample Name:  
 Data Collected on:  
 Co.Chem.LSA.UMich.edu-vnmr#400  
 Archive directory:  
 Sample directory:  
 FidFile: 5-ndb-51-forcarbon-F  
 Pulse Sequence: FLUORINE (s2pul)  
 Solvent: cdcl3  
 Date collected on: Feb 19 2010  
 Operator: nball  
 Relax. delay 1.000 sec  
 Pulse 30.0 degrees  
 Acq. time 0.734 sec  
 Width 89285.7 Hz  
 16 repetitions  
 OBSERVE F19, 376.8658920 MHz  
 DATA PROCESSING  
 Line broadening 0.5 Hz  
 FT size 131072  
 Total time 0 min 31 sec

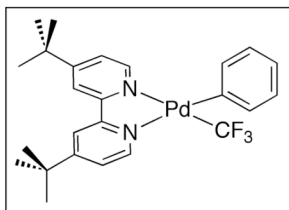

VARIAN

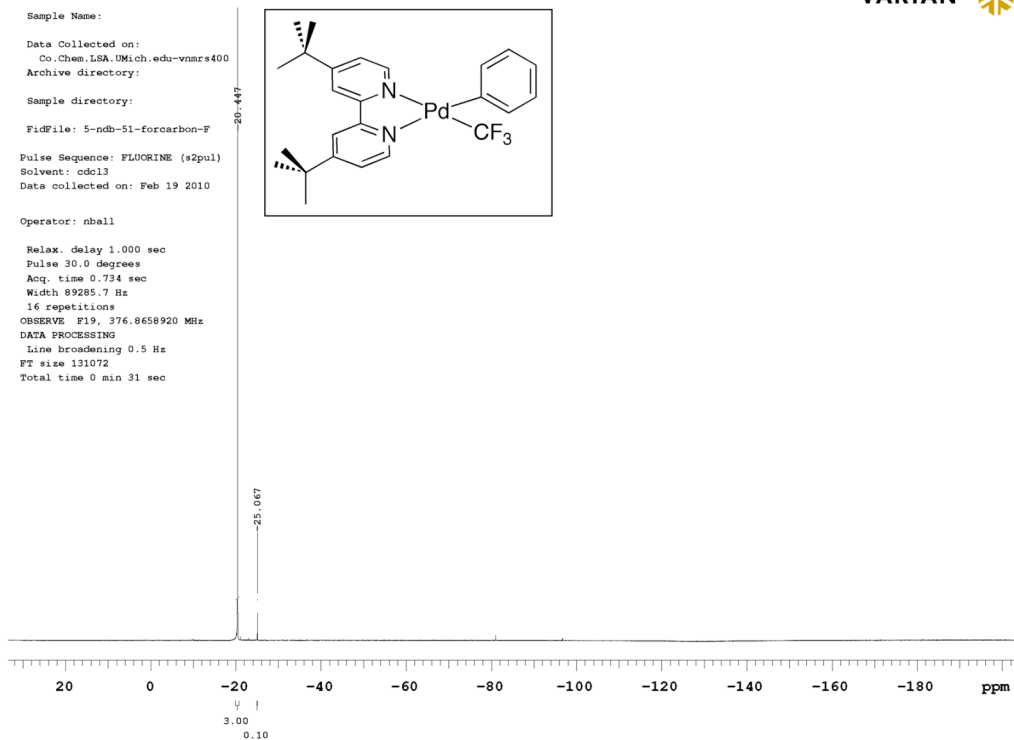

STANDARD CARBON PARAMETERS

Sample Name:  
 Data Collected on:  
 Co.Chem.LSA.UMich.edu-vnmr#400  
 Archive directory:  
 Sample directory:  
 FidFile: 5-ndb-51-forcarbon-C  
 Pulse Sequence: CARBON (\*2pul)  
 Solvent: cdcl3  
 Data collected on: Feb 19 2010

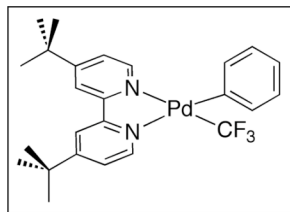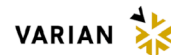

Operator: nball

Relax. delay 0.100 sec  
 Pulse 45.0 degrees  
 Acq. time 2.569 sec  
 Width 25510.2 Hz  
 2720 repetitions  
 OBSERVE C13, 100.7109835 MHz  
 DECOUPLE H1, 400.5225704 MHz  
 Power 41 dB  
 continuously on  
 WALTZ-16 modulated  
 DATA PROCESSING  
 Line broadening 1.0 Hz  
 FT size 131072  
 Total time 2 hr, 1 min

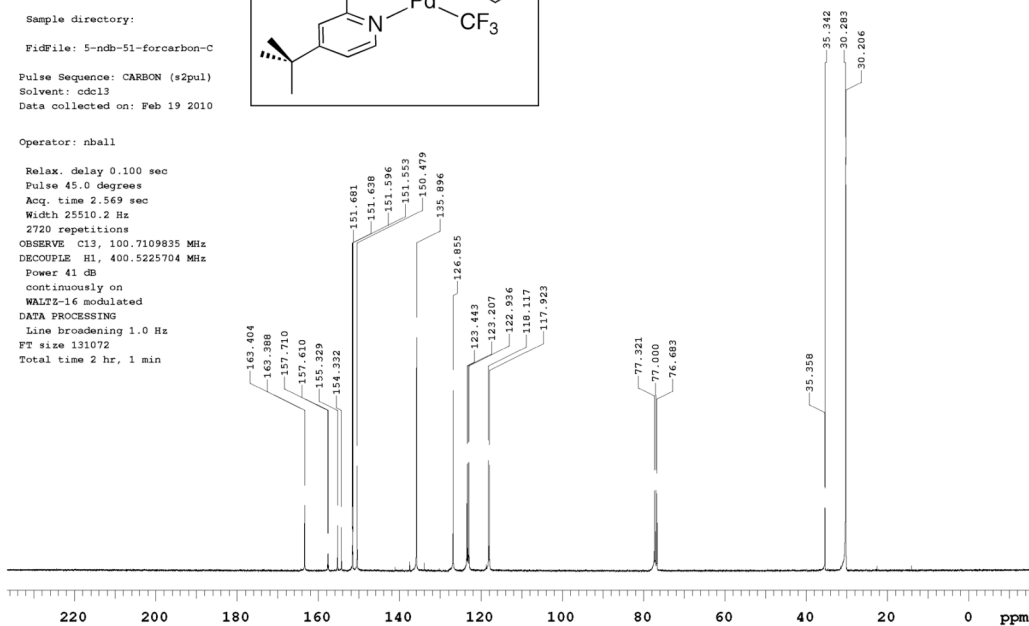

STANDARD CARBON PARAMETERS

Sample Name:  
 Data Collected on:  
 Co.Chem.LSA.UMich.edu-vnmr#400  
 Archive directory:  
 Sample directory:  
 FidFile: 5-ndb-51-forcarbon-C  
 Pulse Sequence: CARBON (\*2pul)  
 Solvent: cdcl3  
 Data collected on: Feb 19 2010

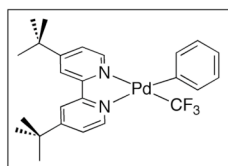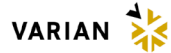

Operator: nball

Relax. delay 0.100 sec  
 Pulse 45.0 degrees  
 Acq. time 2.569 sec  
 Width 25510.2 Hz  
 2720 repetitions  
 OBSERVE C13, 100.7109835 MHz  
 DECOUPLE H1, 400.5225704 MHz  
 Power 41 dB  
 continuously on  
 WALTZ-16 modulated  
 DATA PROCESSING  
 Line broadening 1.0 Hz  
 FT size 131072  
 Total time 2 hr, 1 min

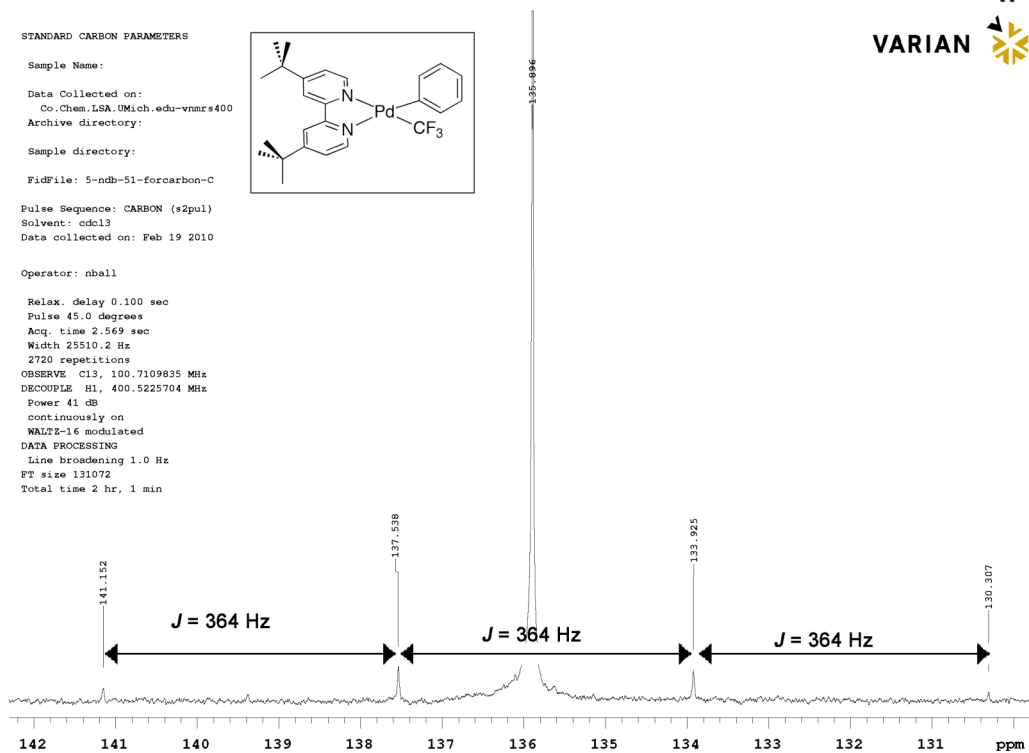

## STANDARD PROTON PARAMETERS

Sample Name:

Data Collected on:  
Co.Chem.LSA.UMich.edu-vnmrs400  
Archive directory:

Sample directory:

FidFile: 5-ndb-56forcarbon-H

Pulse Sequence: PROTON (s2pul)  
Solvent: cdcl3  
Data collected on: Feb 18 2010

Operator: nball

Relax. delay 0.500 sec  
Pulse 45.0 degrees  
Acq. time 3.500 sec  
Width 6410.3 Hz  
16 repetitions  
OBSERVE H1, 400.5205979 MHz  
DATA PROCESSING  
Line broadening 0.3 Hz  
FT size 65536  
Total time 1 min 12 sec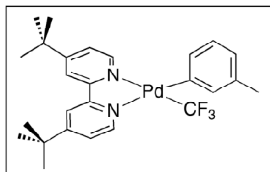

VARIAN

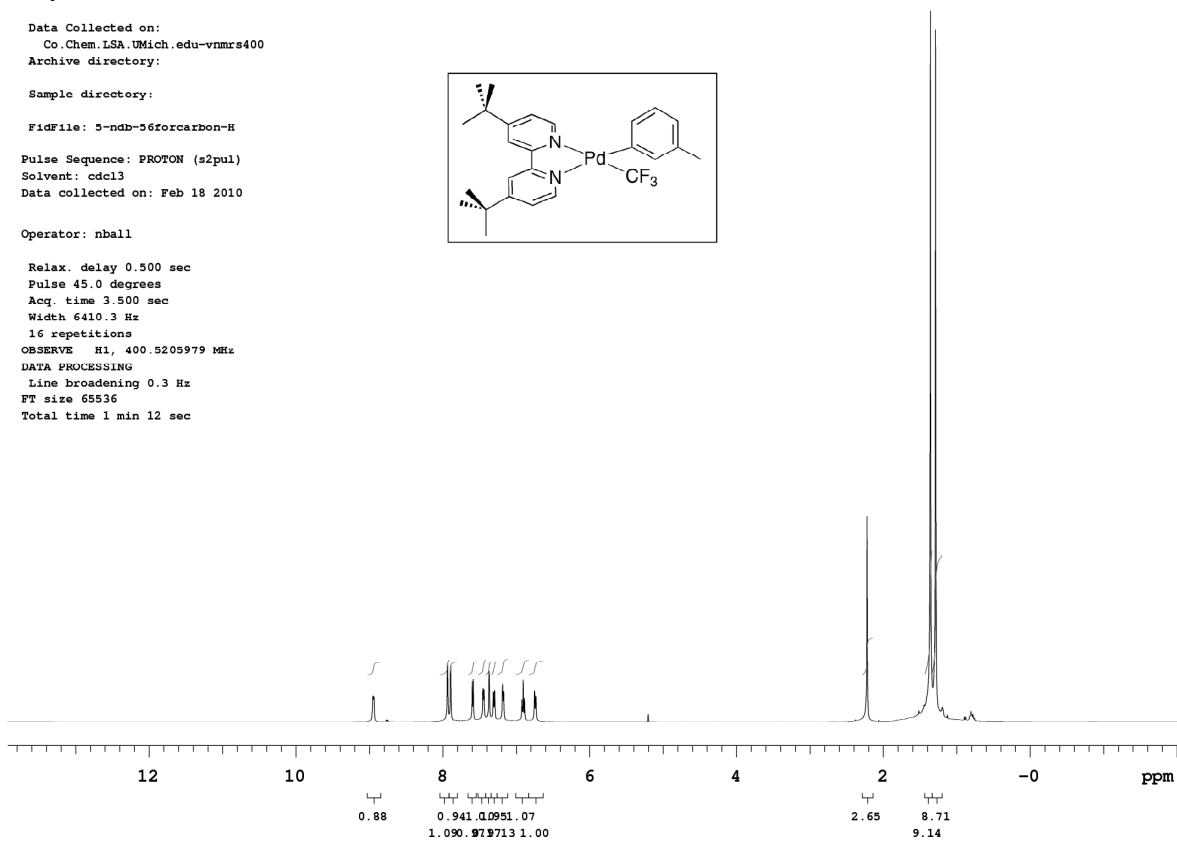

## STANDARD PROTON PARAMETERS

Sample Name:

Data Collected on:  
Co.Chem.LSA.UMich.edu-vnmrs400  
Archive directory:

Sample directory:

FidFile: 5-ndb-56forcarbon-F

Pulse Sequence: FLUORINE (s2pul)  
Solvent: cdcl3  
Data collected on: Feb 18 2010

Operator: nball

Relax. delay 1.000 sec  
Pulse 30.0 degrees  
Acq. time 0.734 sec  
Width 89285.7 Hz  
16 repetitions  
OBSERVE F19, 376.8650963 MHz  
DATA PROCESSING  
Line broadening 0.5 Hz  
FT size 131072  
Total time 0 min 31 sec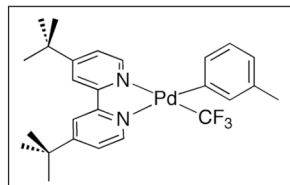

VARIAN

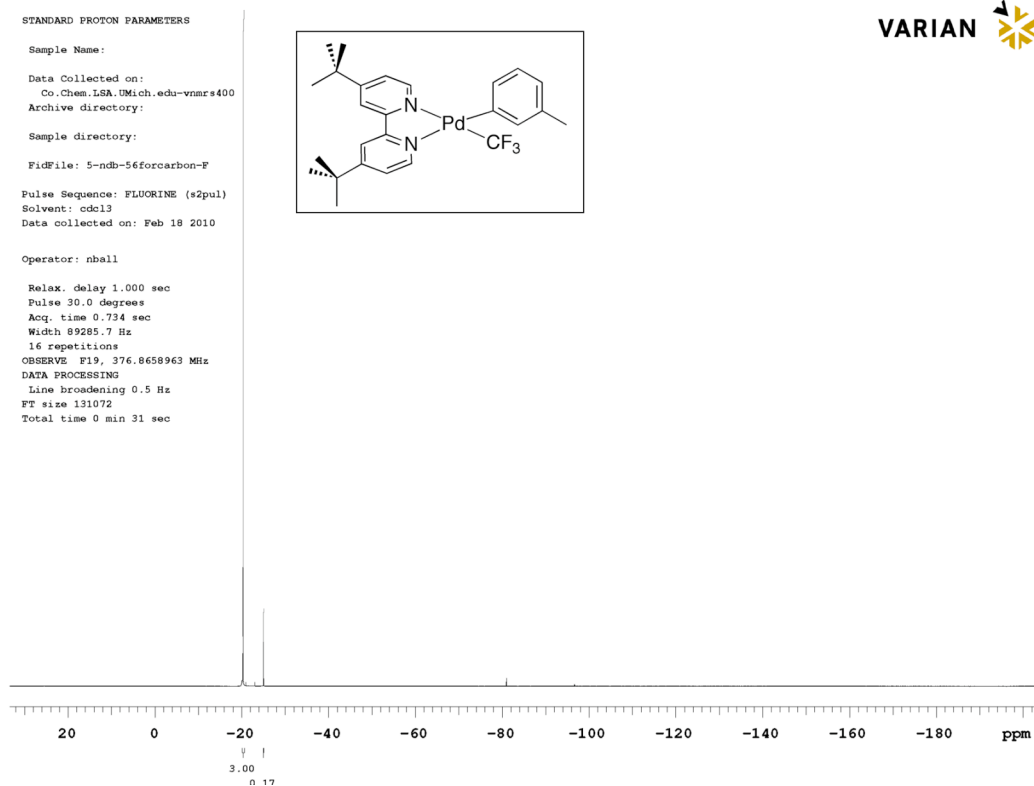

5-ndb-56forcarbon-C

Sample Name:

Data Collected on:  
Co.Chem.LSA.UMich.edu-vnmrs400  
Archive directory:

Sample directory:

FidFile: 5-ndb-56forcarbon-C

Pulse Sequence: CARBON (s2pul)  
Solvent: cdcl3  
Data collected on: Feb 18 2010

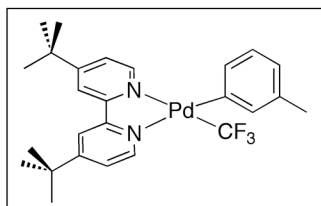

VARIAN

Operator: nball

Relax. delay 0.100 sec  
Pulse 45.0 degrees  
Acq. time 2.569 sec  
Width 25510.2 Hz  
1248 repetitions  
OBSERVE C13, 100.7109847 MHz  
DECOUPLE H1, 400.5225704 MHz  
Power 41 dB  
continuously on  
WALTZ-16 modulated  
DATA PROCESSING  
Line broadening 1.0 Hz  
FT size 131072  
Total time 55 min

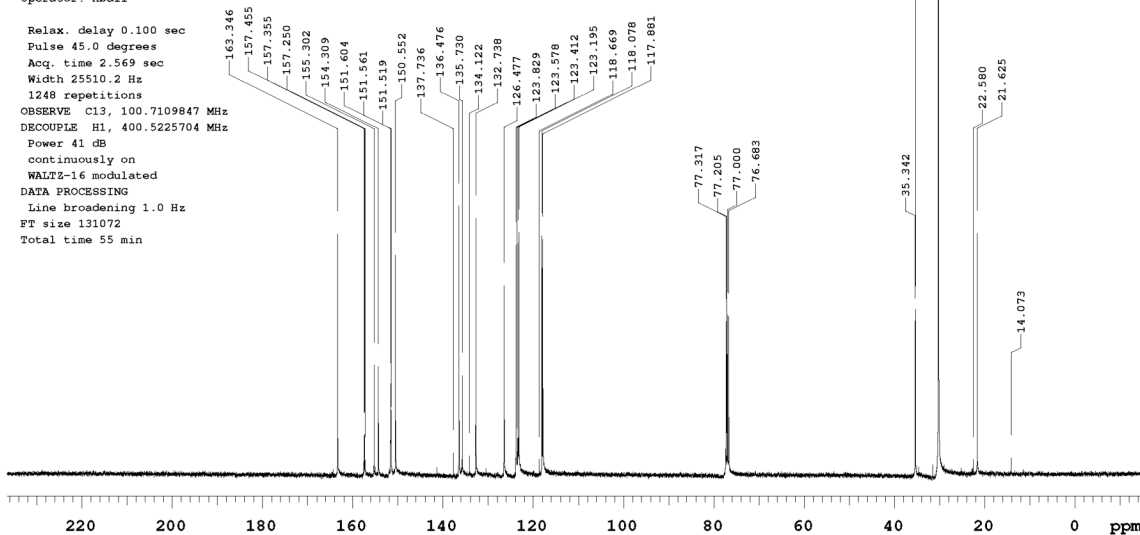

5-ndb-56forcarbon-C

Sample Name:

Data Collected on:  
Co.Chem.LSA.UMich.edu-vnmrs400  
Archive directory:

Sample directory:

FidFile: 5-ndb-56forcarbon-C

Pulse Sequence: CARBON (s2pul)  
Solvent: cdcl3  
Data collected on: Feb 18 2010

Operator: nball

Relax. delay 0.100 sec  
Pulse 45.0 degrees  
Acq. time 2.569 sec  
Width 25510.2 Hz  
1248 repetitions  
OBSERVE C13, 100.7109847 MHz  
DECOUPLE H1, 400.5225704 MHz  
Power 41 dB  
continuously on  
WALTZ-16 modulated  
DATA PROCESSING  
Line broadening 1.0 Hz  
FT size 131072  
Total time 55 min

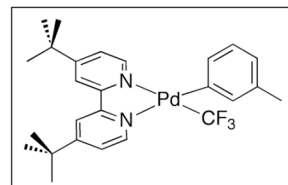

VARIAN

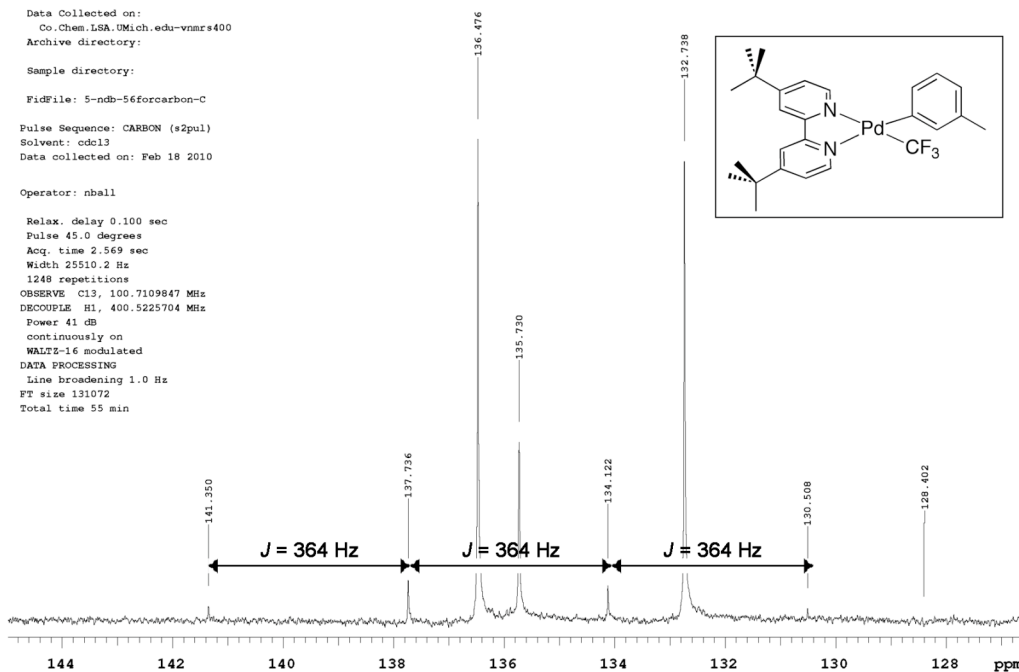

4-ndb-257-Hforcarbon

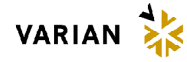

Sample Name:

Data Collected on:  
Co.Chem.LSA.UMich.edu-vnmrs400  
Archive directory:

Sample directory:

FidFile: 4-ndb-257-Hforcarbon

Pulse Sequence: PROTON (s2pul)  
Solvent: cdcl3  
Data collected on: Oct 26 2009

Operator: nball

Relax. delay 0.500 sec  
Pulse 45.0 degrees  
Acq. time 3.500 sec  
Width 6410.3 Hz  
16 repetitions  
OBSERVE H1, 400.5205678 MHz  
DATA PROCESSING  
Line broadening 0.3 Hz  
FT size 65526  
Total time 1 min 12 sec

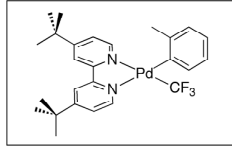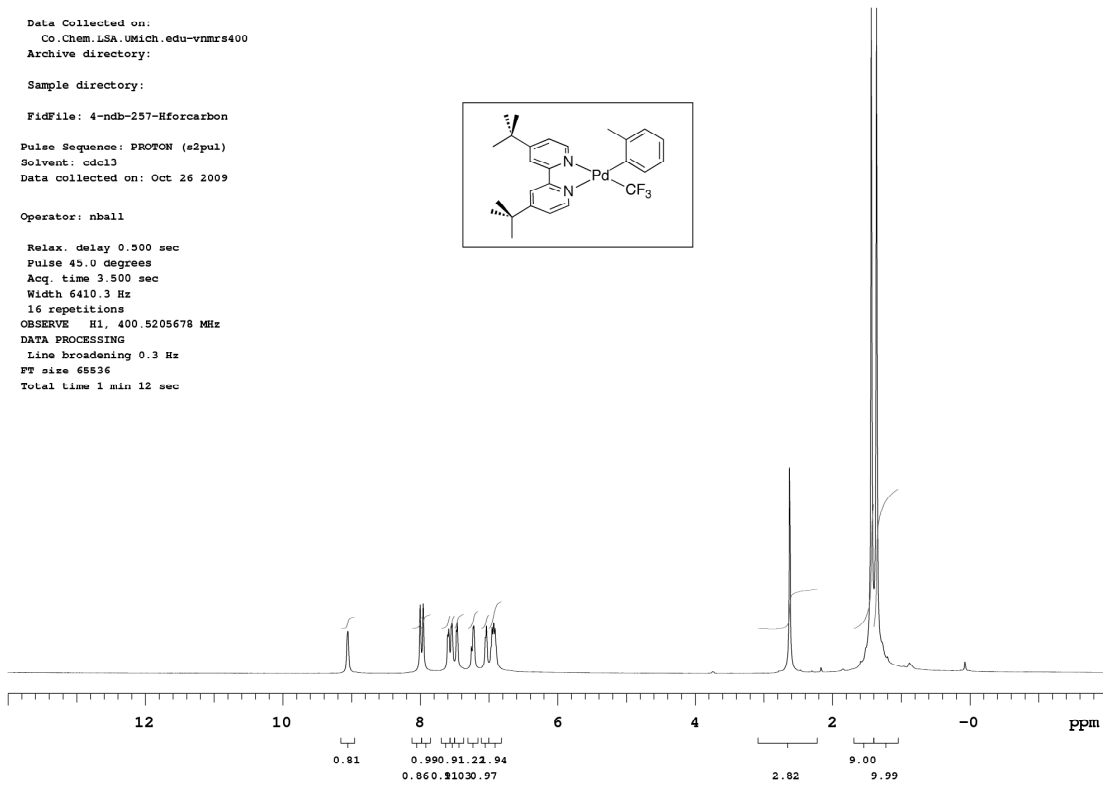

4-ndb-257-Fforcarbon

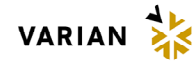

Sample Name:

Data Collected on:  
Co.Chem.LSA.UMich.edu-vnmrs400  
Archive directory:

Sample directory:

FidFile: 4-ndb-257-Fforcarbon

Pulse Sequence: FLUORINE (s2pul)  
Solvent: cdcl3  
Data collected on: Oct 26 2009

Operator: nball

Relax. delay 1.000 sec  
Pulse 30.0 degrees  
Acq. time 0.734 sec  
Width 89285.7 Hz  
16 repetitions  
OBSERVE F19, 376.8658742 MHz  
DATA PROCESSING  
Line broadening 0.5 Hz  
FT size 131072  
Total time 0 min 31 sec

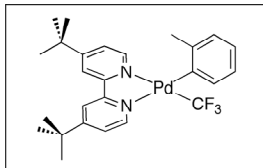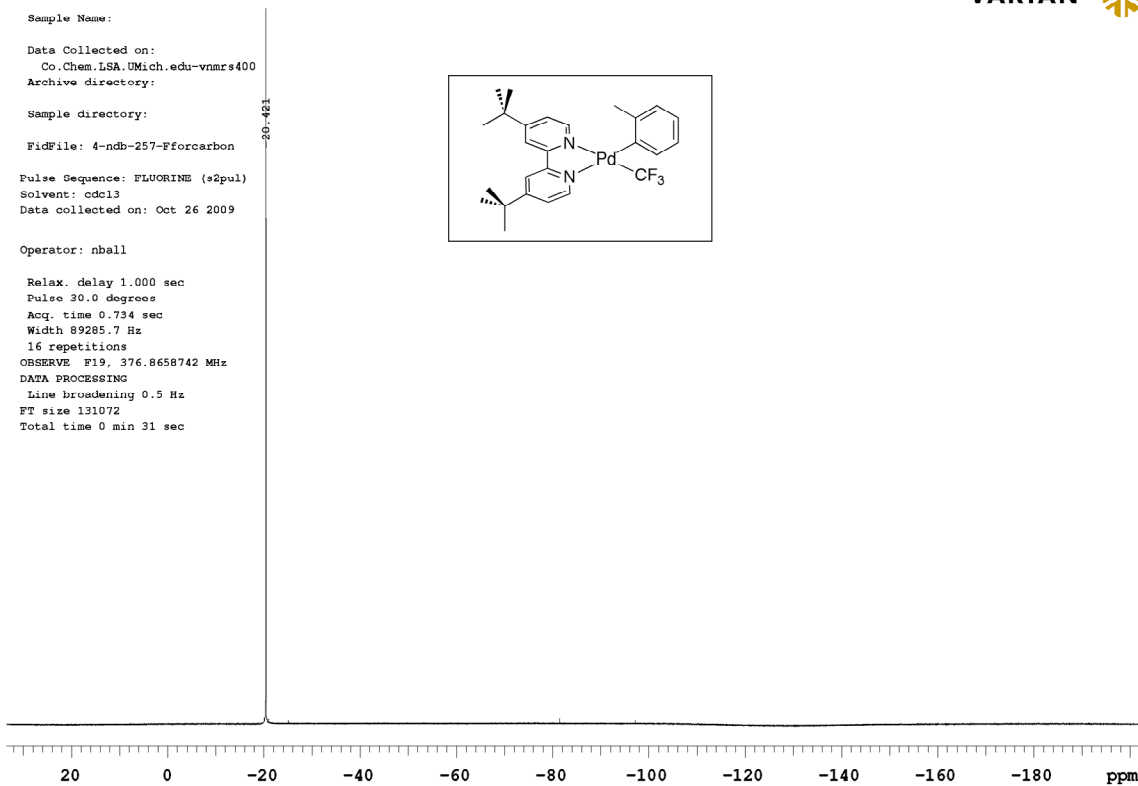

4-ndb-257-Cforcarbon

Sample Name:

Data Collected on:  
Co.Chem.LSA.UMich.edu-vnmrs400  
Archive directory:

Sample directory:

FidFile: 4-ndb-257-Cforcarbon

Pulse Sequence: CARBON (s2pul)  
Solvent: cdcl3  
Data collected on: Oct 26 2009

Operator: nball

Relax. delay 0.100 sec  
Pulse 45.0 degrees  
Acq. time 2.569 sec  
Width 25510.2 Hz  
3744 repetitions  
OBSERVE C13, 100.7109788 MHz  
DECOUPLE H1, 400.5225704 MHz  
Power 41 dB  
continuously on  
WALTZ-16 modulated  
DATA PROCESSING  
Line broadening 2.0 Hz  
FT size 131072  
Total time 2 hr, 47 min

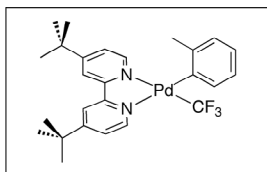

VARIAN

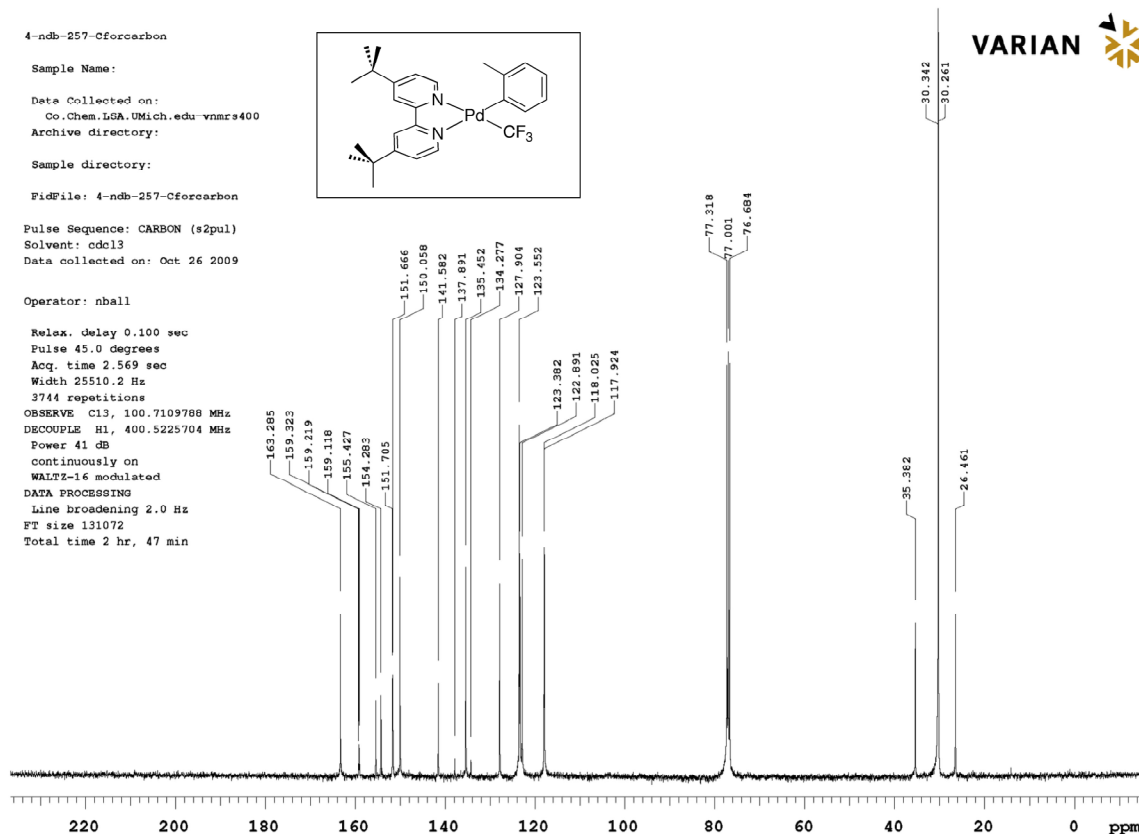

4-ndb-257-Cforcarbon

Sample Name:

Data Collected on:  
Co.Chem.LSA.UMich.edu-vnmrs400  
Archive directory:

Sample directory:

FidFile: 4-ndb-257-Cforcarbon

Pulse Sequence: CARBON (s2pul)  
Solvent: cdcl3  
Data collected on: Oct 26 2009

Operator: nball

Relax. delay 0.100 sec  
Pulse 45.0 degrees  
Acq. time 2.569 sec  
Width 25510.2 Hz  
3744 repetitions  
OBSERVE C13, 100.7109788 MHz  
DECOUPLE H1, 400.5225704 MHz  
Power 41 dB  
continuously on  
WALTZ-16 modulated  
DATA PROCESSING  
Line broadening 2.0 Hz  
FT size 131072  
Total time 2 hr, 47 min

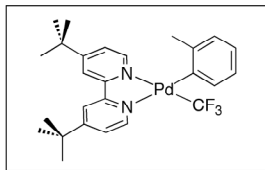

VARIAN

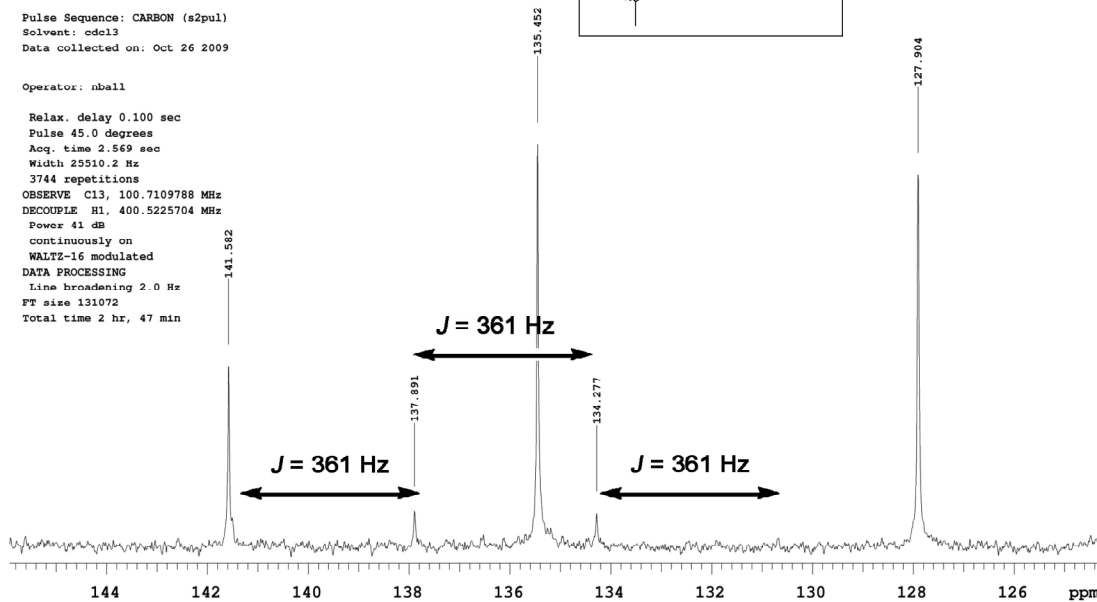

5-ndb-196forcarbon-H

Sample Name:

Data Collected on:  
Co.Chem.LSA.UMich.edu-vnmrs400

Archive directory:

Sample directory:

FidFile: 5-ndb-196forcarbon-H

Pulse Sequence: PROTON (s2pul)  
Solvent: cd2cl2  
Data collected on: Sep 15 2010

Temp. 25.0 C / 298.1 K  
Operator: nball

Relax. delay 0.500 sec  
Pulse 45.0 degrees  
Acq. time 3.500 sec  
Width 6410.3 Hz  
16 repetitions  
OBSERVE H1, 400.5214078 MHz  
DATA PROCESSING  
Line broadening 0.3 Hz  
FT size 65536  
Total time 1 min 12 sec

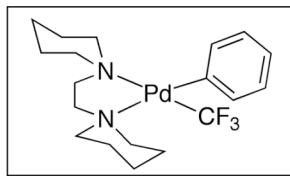

VARIAN

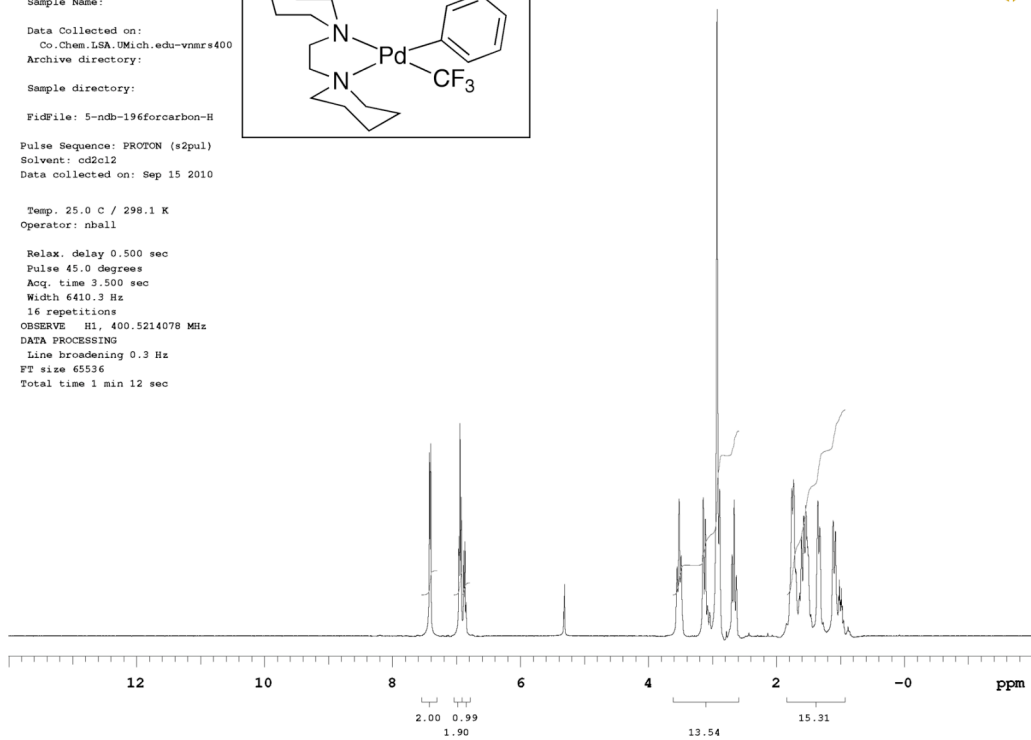

5-ndb-196-frocarbon-9212010-F

Sample Name:

Data Collected on:  
Co.Chem.LSA.UMich.edu-vnmrs400

Archive directory:

Sample directory:

FidFile: 5-ndb-196-frocarbon-9212010-F

Pulse Sequence: FLUORINE (s2pul)  
Solvent: cd2cl2  
Data collected on: Sep 21 2010

Temp. 25.0 C / 298.1 K  
Operator: nball

Relax. delay 1.000 sec  
Pulse 30.0 degrees  
Acq. time 0.734 sec  
Width 89285.7 Hz  
16 repetitions  
OBSERVE F19, 376.8666575 MHz  
DATA PROCESSING  
Line broadening 1.5 Hz  
FT size 131072  
Total time 0 min 31 sec

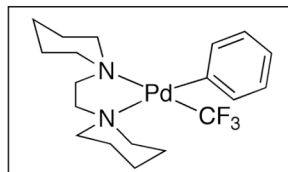

VARIAN

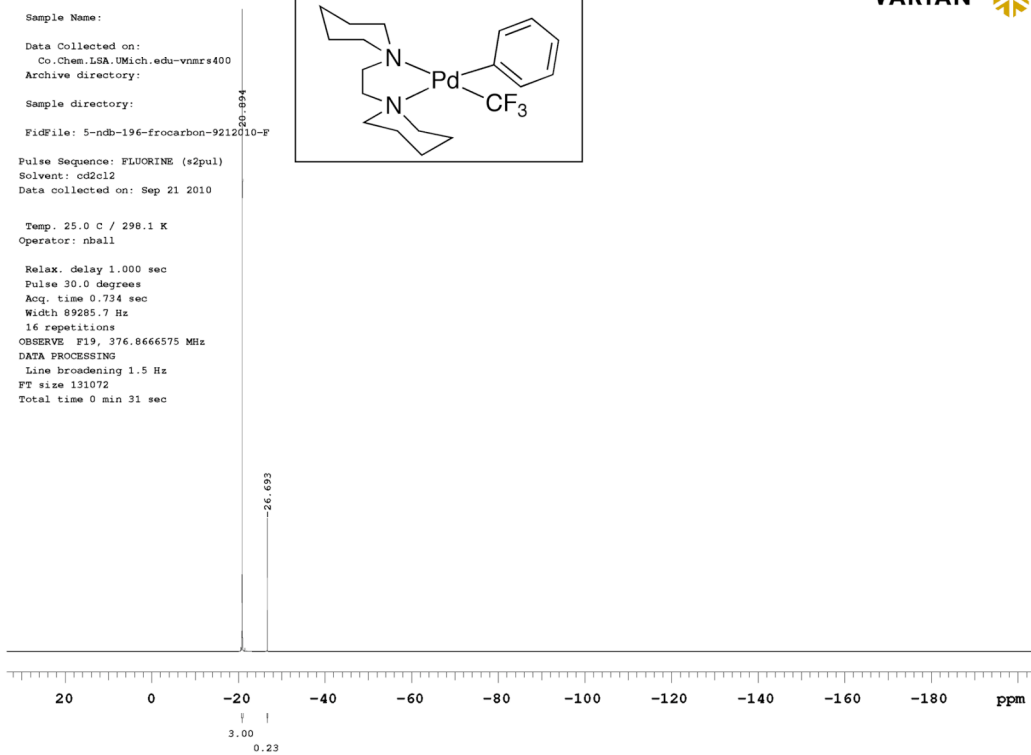



STANDARD CARBON PARAMETERS

Sample Name:  
 Data Collected on:  
 Co.Chem.LSA.UMich.edu-vnmrs400  
 Archive directory:  
 Sample directory:  
 FidFile: 5-ndb-196-frocarbon-9212010-C

Pulse Sequence: CARBON (s2pul)  
 Solvent: cd2cl2  
 Data collected on: Sep 21 2010

Temp. 25.0 C / 298.1 K  
 Operator: nball

Relax. delay 0.100 sec  
 Pulse 45.0 degrees  
 Acq. time 2.569 sec  
 Width 25510.2 Hz

832 repetitions  
 OBSERVE C13, 100.7111560 MHz  
 DECOUPLE H1, 400.5234104 MHz  
 Power 41 dB  
 continuously on  
 WALTZ-16 modulated  
 DATA PROCESSING  
 Line broadening 1.0 Hz  
 FT size 131072  
 Total time 37 min

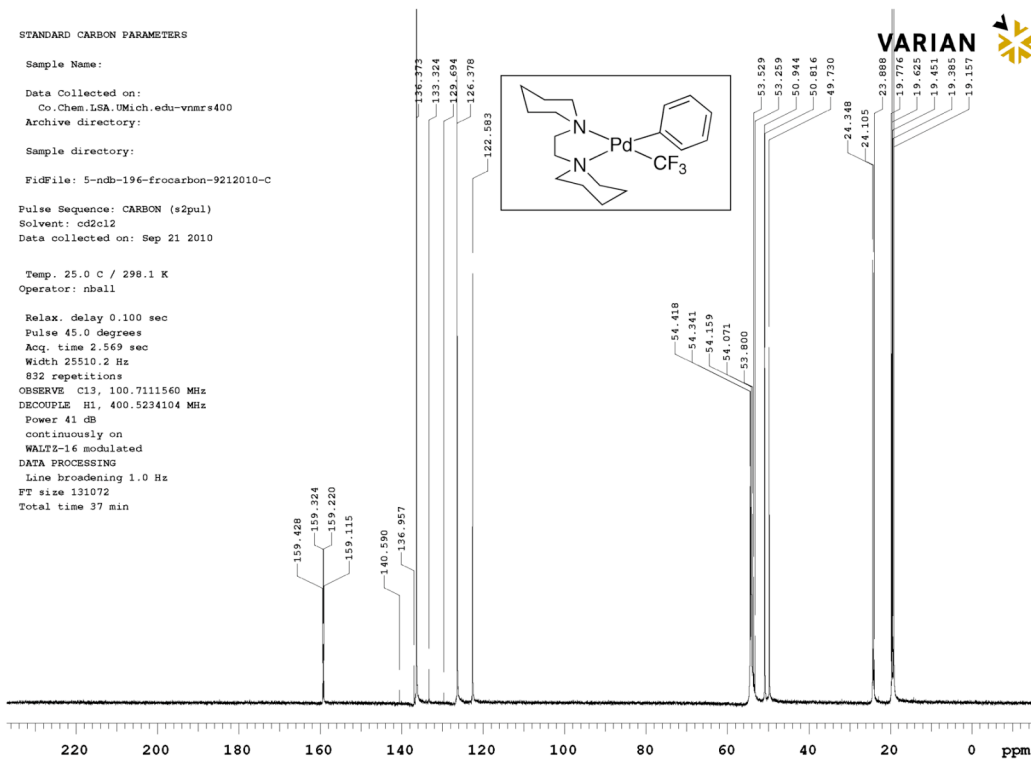

STANDARD CARBON PARAMETERS

Sample Name:  
 Data Collected on:  
 Co.Chem.LSA.UMich.edu-vnmrs400  
 Archive directory:  
 Sample directory:  
 FidFile: 5-ndb-196-frocarbon-9212010-C

Pulse Sequence: CARBON (s2pul)  
 Solvent: cd2cl2  
 Data collected on: Sep 21 2010

Temp. 25.0 C / 298.1 K  
 Operator: nball

Relax. delay 0.100 sec  
 Pulse 45.0 degrees  
 Acq. time 2.569 sec  
 Width 25510.2 Hz

832 repetitions  
 OBSERVE C13, 100.7111560 MHz  
 DECOUPLE H1, 400.5234104 MHz  
 Power 41 dB  
 continuously on  
 WALTZ-16 modulated  
 DATA PROCESSING  
 Line broadening 1.0 Hz  
 FT size 131072  
 Total time 37 min

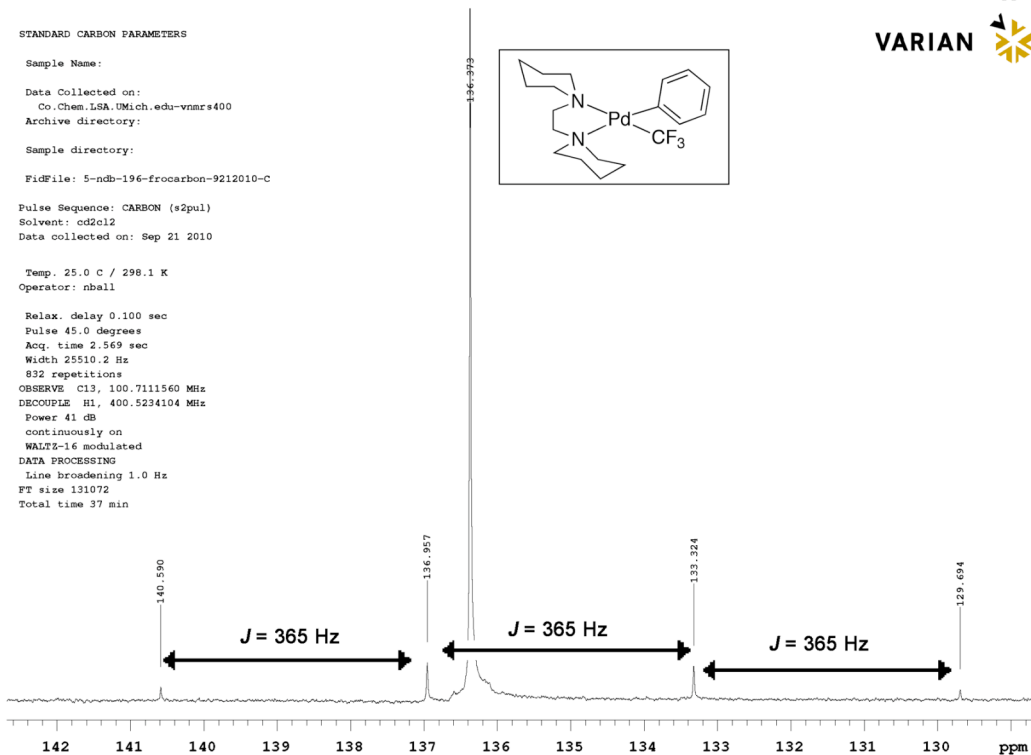

## STANDARD PROTON PARAMETERS

Sample Name:  
 Data Collected on:  
 Zr.Chem.LSA.UMich.edu-inova400  
 Archive directory:  
 Sample directory:  
 FidFile: 5-ndb-191-DCE-H  
 Pulse Sequence: PROTON (s2pul)  
 Solvent: dichloroethane  
 Data collected on: Sep 3 2010  
 Temp. 25.0 C / 298.1 K  
 Operator: nball  
 Relax. delay 0.500 sec  
 Pulse 45.0 degrees  
 Acq. time 3.500 sec  
 Width 6399.5 Hz  
 16 repetitions  
 OBSERVE H1, 399.9663645 MHz  
 DATA PROCESSING  
 Line broadening 0.3 Hz  
 FT size 65536  
 Total time 1 min 12 sec

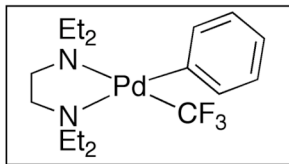

VARIAN 

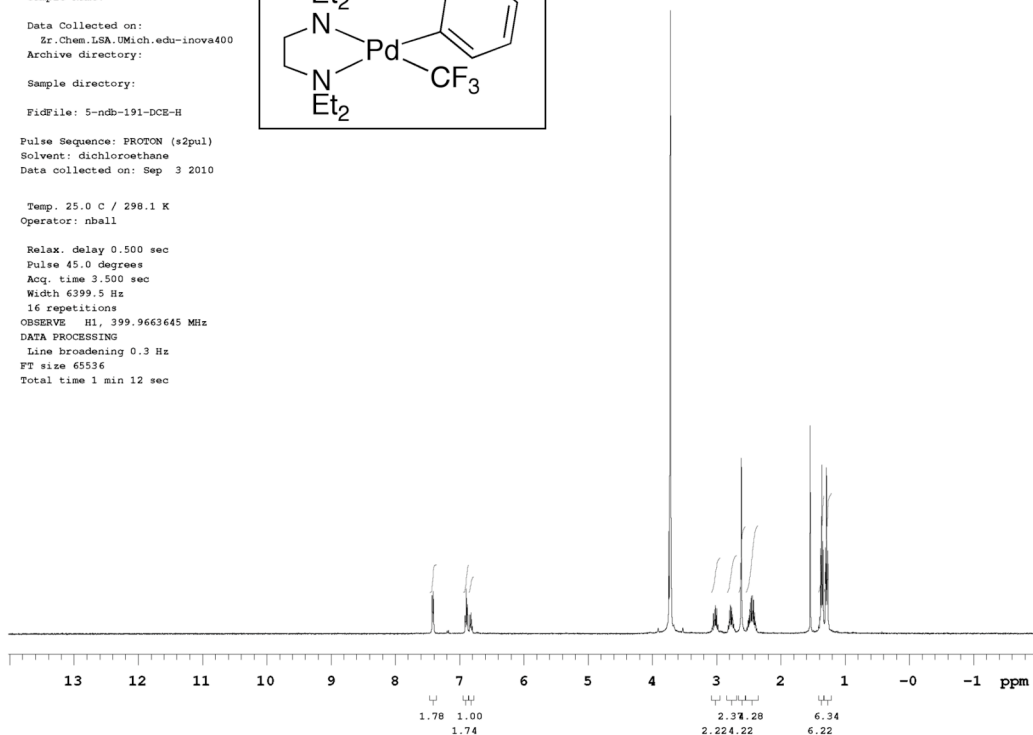

5-ndb-191-DCE-F

Sample Name:  
 Data Collected on:  
 Zr.Chem.LSA.UMich.edu-inova400  
 Archive directory:  
 Sample directory:  
 FidFile: 5-ndb-191-DCE-F  
 Pulse Sequence: FLUORINE (s2pul)  
 Solvent: dichloroethane  
 Data collected on: Sep 3 2010  
 Temp. 25.0 C / 298.1 K  
 Operator: nball  
 Relax. delay 1.000 sec  
 Pulse 30.0 degrees  
 Acq. time 0.757 sec  
 Width 86580.1 Hz  
 16 repetitions  
 OBSERVE F19, 376.3443950 MHz  
 DATA PROCESSING  
 Line broadening 0.5 Hz  
 FT size 131072  
 Total time 0 min 32 sec

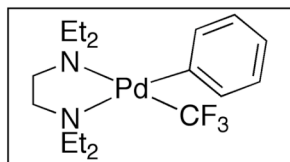

VARIAN 

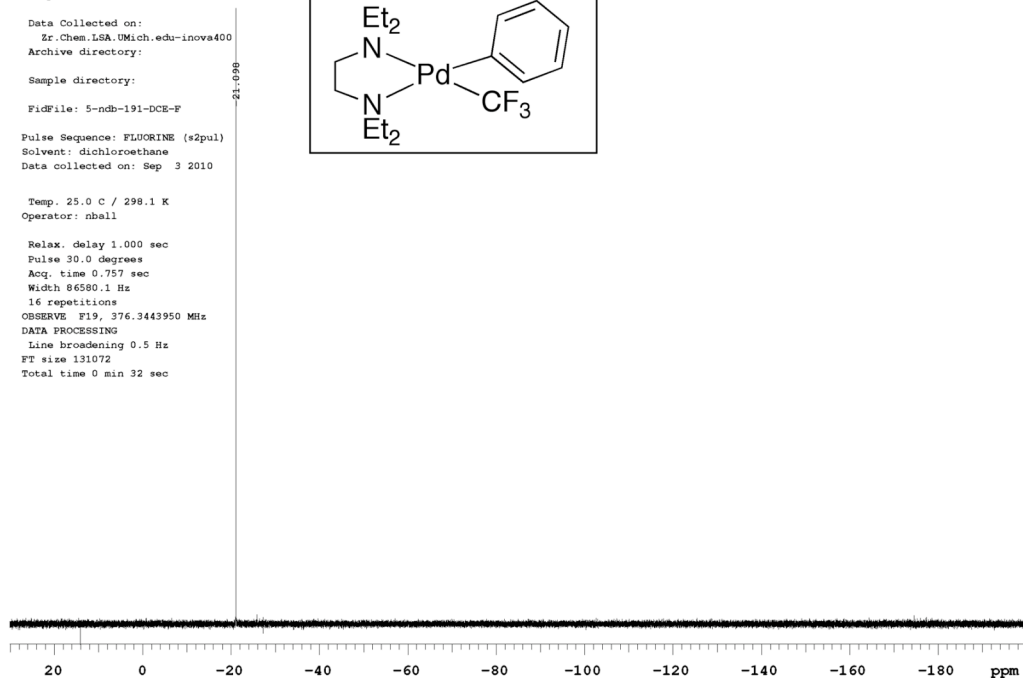

5-ndb-191-forcarbon-C  
 Sample Name:  
 Data Collected on:  
 Co.Chem.LSA.UMich.edu-vnmrs400  
 Archive directory:  
 Sample directory:  
 FidFile: 5-ndb-191-forcarbon-C  
 Pulse Sequence: CARBON (\*2pul)  
 Solvent: dichloroethane  
 Data collected on: Sep 6 2010

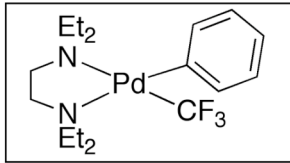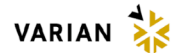

Temp. 25.0 C / 298.1 K  
 Operator: nball

Relax. delay 0.100 sec  
 Pulse 45.0 degrees  
 Acq. time 2.569 sec  
 Width 25510.2 Hz  
 1056 repetitions  
 OBSERVE C13, 100.7113230 MHz  
 DECOUPLE H1, 400.5240513 MHz  
 Power 41 dB  
 continuously on  
 WALTZ-16 modulated  
 DATA PROCESSING  
 Line broadening 1.0 Hz  
 FT size 131072  
 Total time 47 min

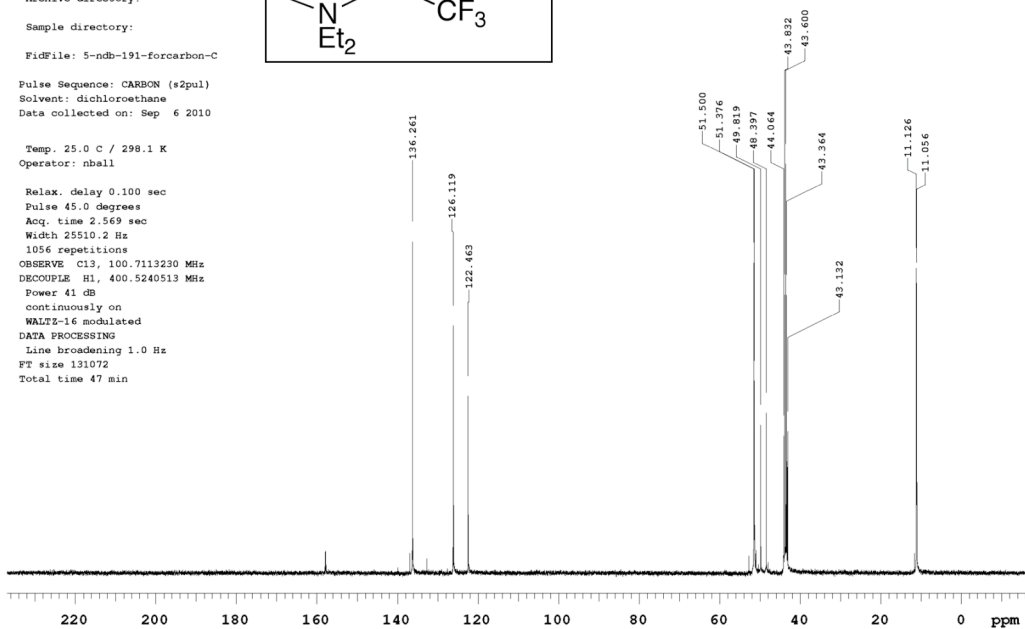

5-ndb-191-forcarbon-C  
 Sample Name:  
 Data Collected on:  
 Co.Chem.LSA.UMich.edu-vnmrs400  
 Archive directory:  
 Sample directory:  
 FidFile: 5-ndb-191-forcarbon-C  
 Pulse Sequence: CARBON (\*2pul)  
 Solvent: dichloroethane  
 Data collected on: Sep 6 2010

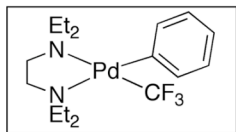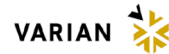

Temp. 25.0 C / 298.1 K  
 Operator: nball

Relax. delay 0.100 sec  
 Pulse 45.0 degrees  
 Acq. time 2.569 sec  
 Width 25510.2 Hz  
 1056 repetitions  
 OBSERVE C13, 100.7113230 MHz  
 DECOUPLE H1, 400.5240513 MHz  
 Power 41 dB  
 continuously on  
 WALTZ-16 modulated  
 DATA PROCESSING  
 Line broadening 1.0 Hz  
 FT size 131072  
 Total time 47 min

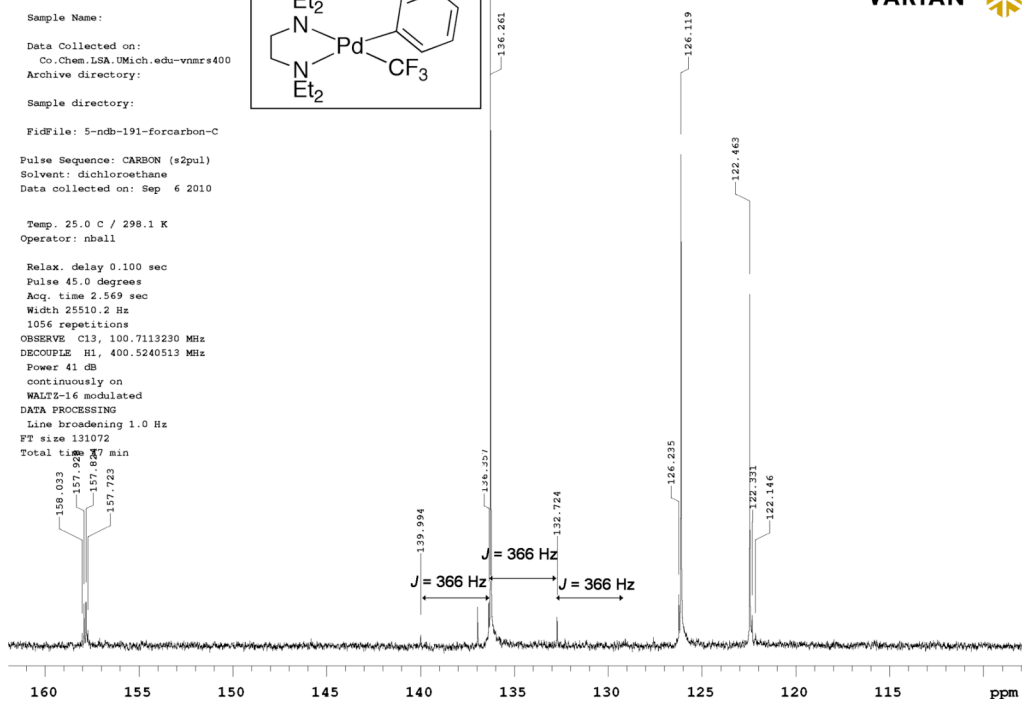

5-ndb-135-forcarbon-H

Sample Name:  
Data Collected on:  
Co.Chem.LSA.UMich.edu-vnmrs400  
Archive directory:  
Sample directory:  
FidFile: 5-ndb-135-forcarbon-H  
Pulse Sequence: PROTON (\*2pul)  
Solvent: cdcl3  
Data collected on: Sep 8 2010

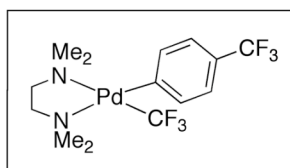

VARIAN 

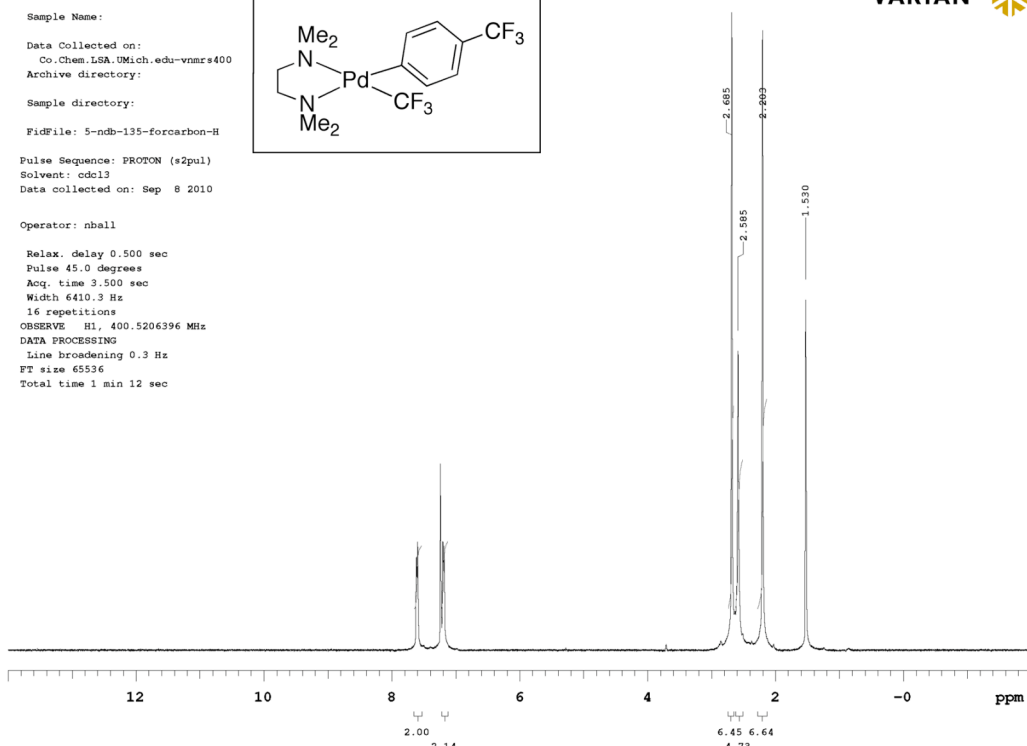

5-ndb-135-forcarbon-F

Sample Name:  
Data Collected on:  
Co.Chem.LSA.UMich.edu-vnmrs400  
Archive directory:  
Sample directory:  
FidFile: 5-ndb-135-forcarbon-F  
Pulse Sequence: FLUORINE (s2pul)  
Solvent: cdcl3  
Data collected on: Sep 8 2010  
Operator: nball  
Relax. delay 1.000 sec  
Pulse 30.0 degrees  
Acq. time 0.734 sec  
Width 89285.7 Hz  
16 repetitions  
OBSERVE F19, 376.8659347 MHz  
DATA PROCESSING  
Line broadening 1.5 Hz  
FT size 131072  
Total time 0 min 31 sec

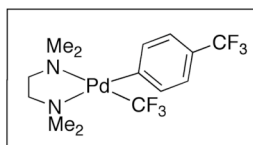

VARIAN 

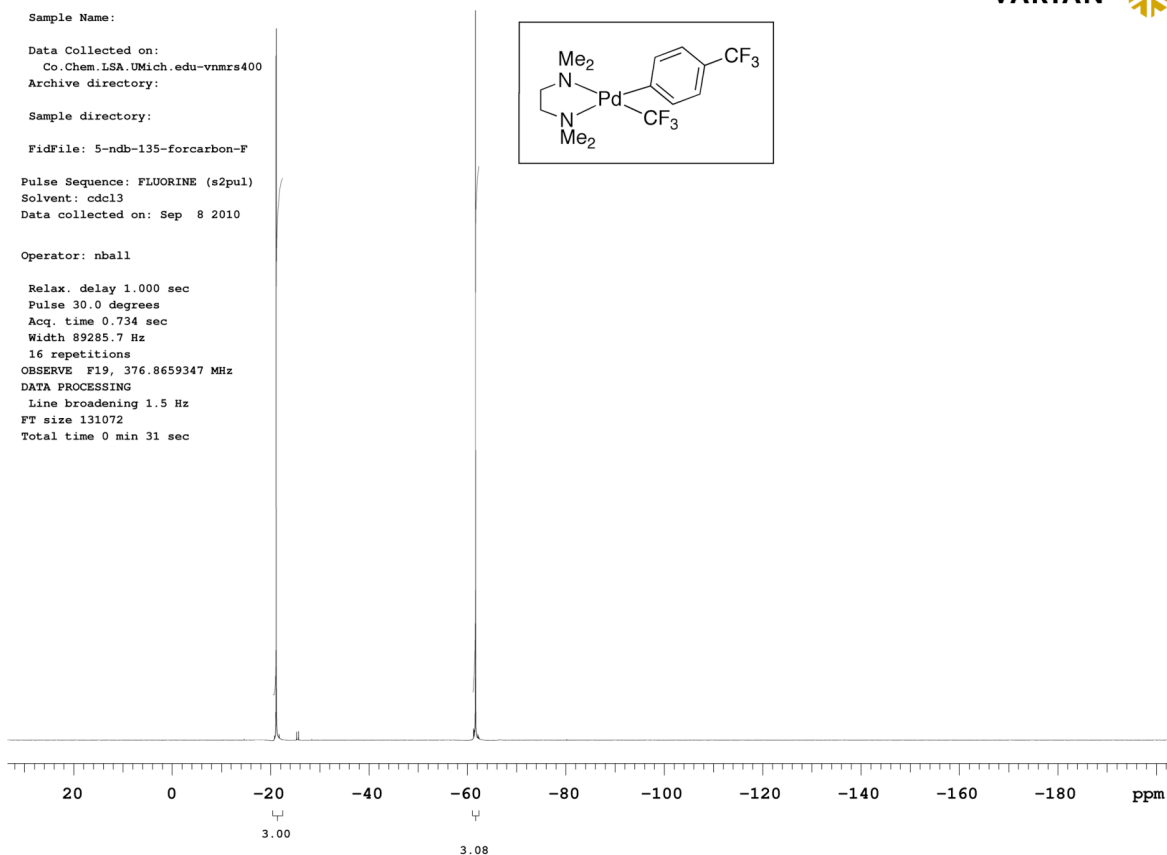

5-ndb-135-forcarbon-C  
 Sample Name:  
 Data Collected on:  
 Co.Chem.LSA.UMich.edu-vnmr#400  
 Archive directory:  
 Sample directory:  
 FidFile: 5-ndb-135-forcarbon-C  
 Pulse Sequence: CARBON (\*2pul)  
 Solvent: cdcl3  
 Data collected on: Sep 8 2010

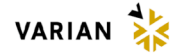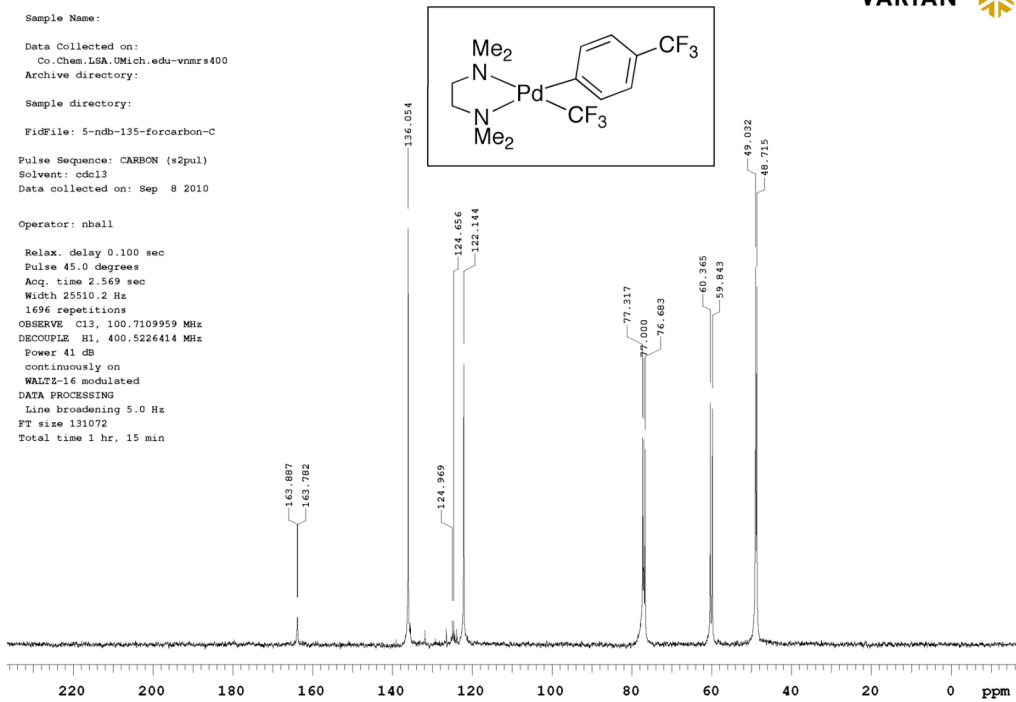

5-ndb-135-forcarbon-C  
 Sample Name:  
 Data Collected on:  
 Co.Chem.LSA.UMich.edu-vnmr#400  
 Archive directory:  
 Sample directory:  
 FidFile: 5-ndb-135-forcarbon-C  
 Pulse Sequence: CARBON (\*2pul)  
 Solvent: cdcl3  
 Data collected on: Sep 8 2010

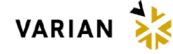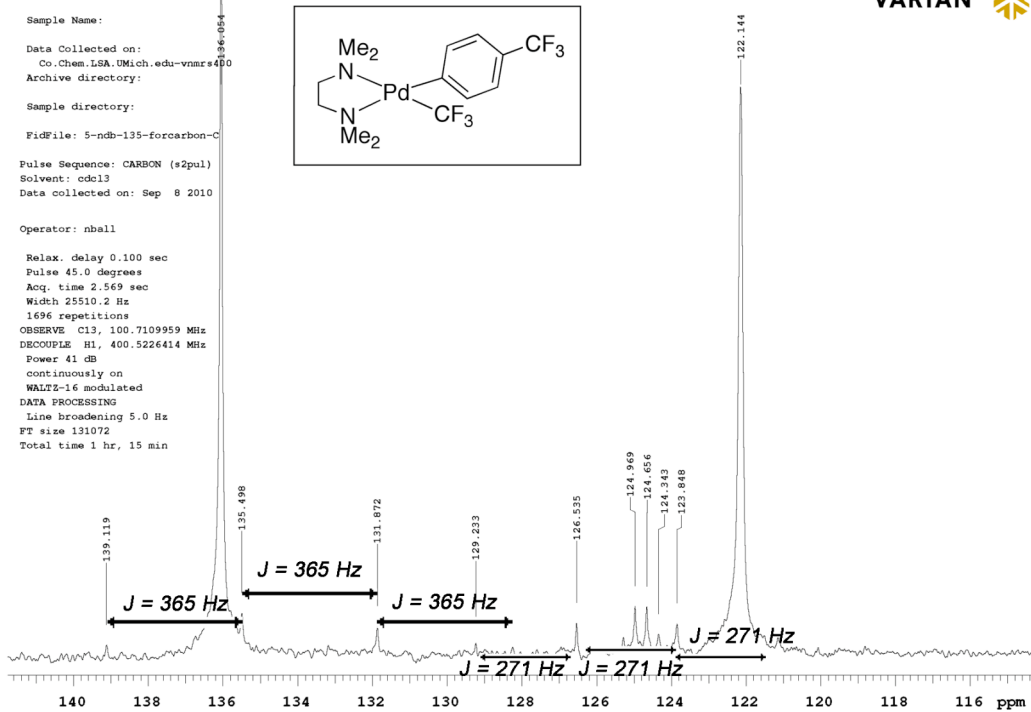

5-ndb-205-pCN-H

Sample Name:

Data Collected on:  
Zr.Chem.LSA.UMich.edu-inova400  
Archive directory:

Sample directory:

FidFile: 5-ndb-205-pCN-H

Pulse Sequence: PROTON (s2pul)  
Solvent: cdcl3  
Data collected on: Nov 3 2010

Operator: nball

Relax. delay 0.500 sec  
Pulse 45.0 degrees  
Acq. time 3.500 sec  
Width 6399.5 Hz  
16 repetitions  
OBSERVE H1, 399.9649552 MHz  
DATA PROCESSING  
Line broadening 0.3 Hz  
FT size 65536  
Total time 1 min 12 sec

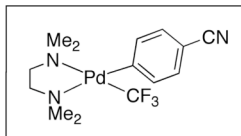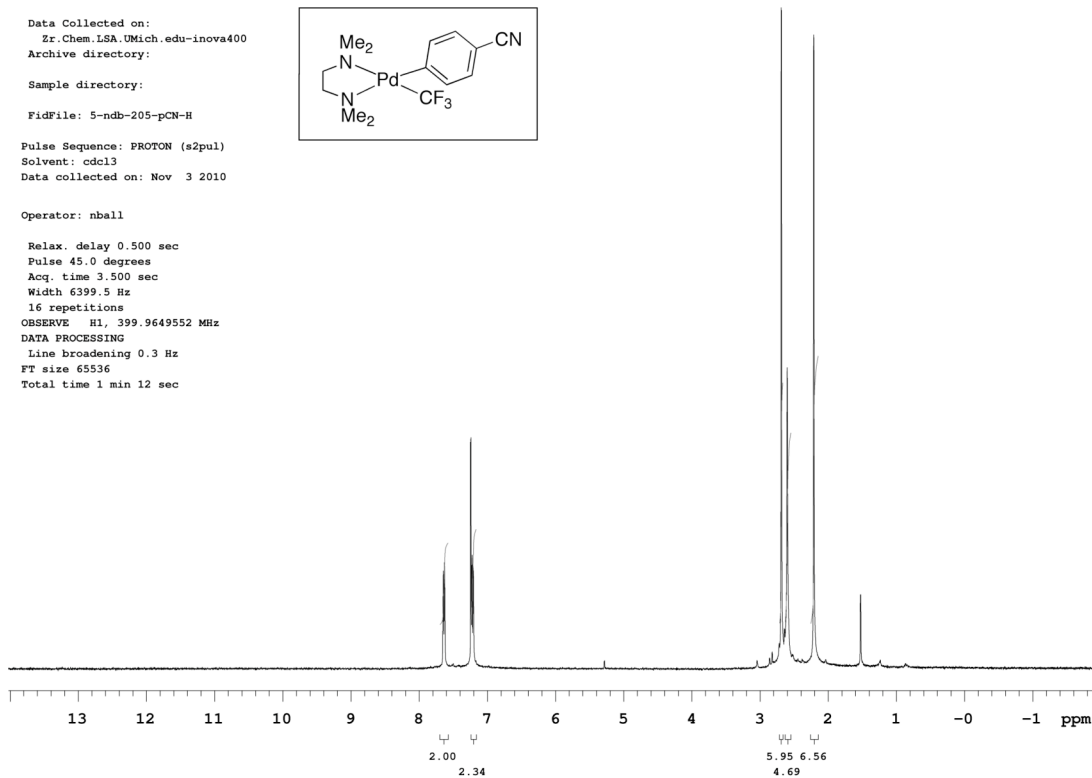

5-ndb-205-pCN-F

Sample Name:

Data Collected on:  
Zr.Chem.LSA.UMich.edu-inova400  
Archive directory:

Sample directory:

FidFile: 5-ndb-205-pCN-F

Pulse Sequence: FLUORINE (s2pul)  
Solvent: cdcl3  
Data collected on: Nov 3 2010

Operator: nball

Relax. delay 1.000 sec  
Pulse 30.0 degrees  
Acq. time 0.757 sec  
Width 86580.1 Hz  
16 repetitions  
OBSERVE F19, 376.3430705 MHz  
DATA PROCESSING  
Line broadening 0.5 Hz  
FT size 131072  
Total time 0 min 32 sec

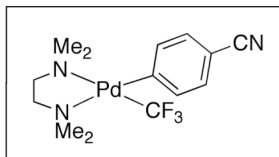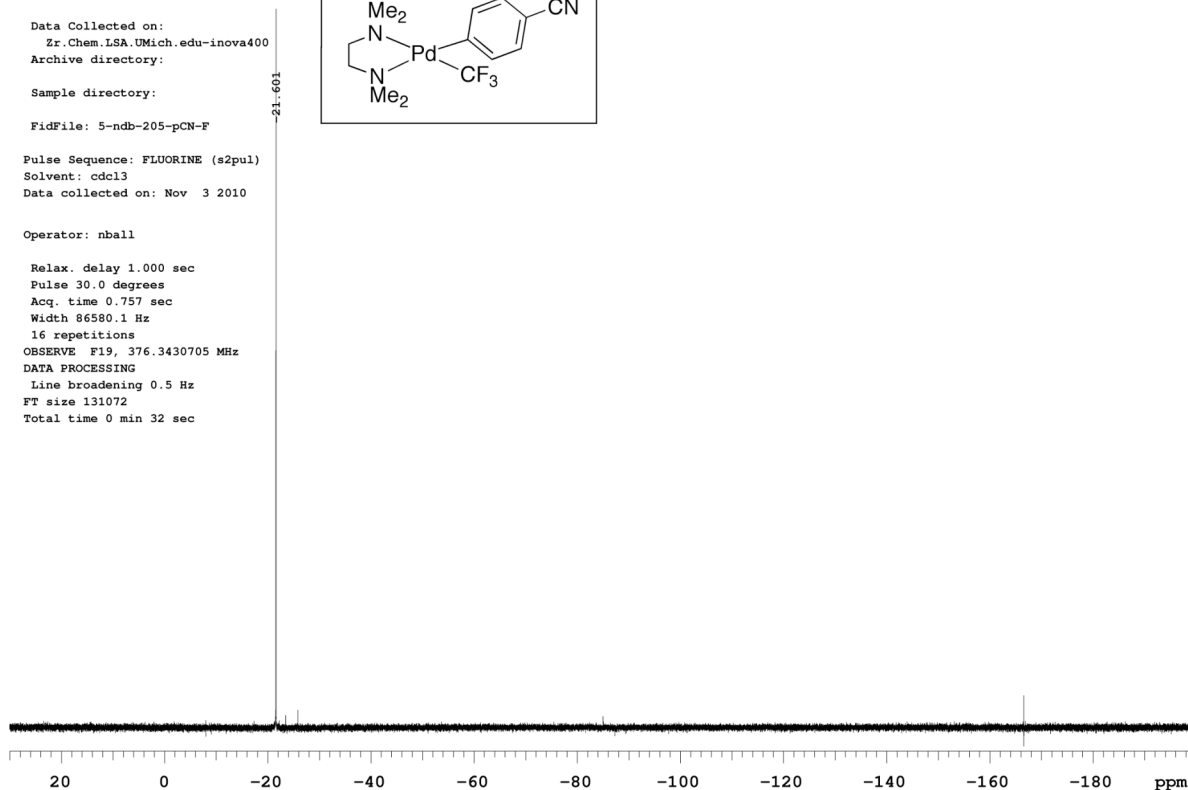

5-ndb-205-pCNforcarbon-C-best

Sample Name:

Data Collected on:  
Co.Chem.LSA.UMich.edu-vmrs400  
Archive directory:

Sample directory:

FidFile: 5-ndb-205-pCNforcarbon-C-best

Pulse Sequence: CARBON (s2pul)  
Solvent: cdcl3  
Data collected on: Oct 18 2010

Operator: nball

Relax. delay 0.100 sec  
Pulse 45.0 degrees  
Acq. time 2.569 sec  
Width 25510.2 Hz  
1098 repetitions  
OBSERVE C13, 100.7110005 MHz  
DECOUPLE H1, 400.5226414 MHz  
Power 41 dB  
continuously on  
WALTZ-16 modulated  
DATA PROCESSING  
Line broadening 5.0 Hz  
FT size 131072  
Total time 48 min

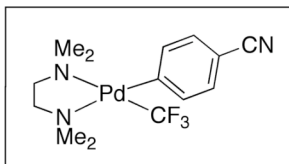

VARIAN

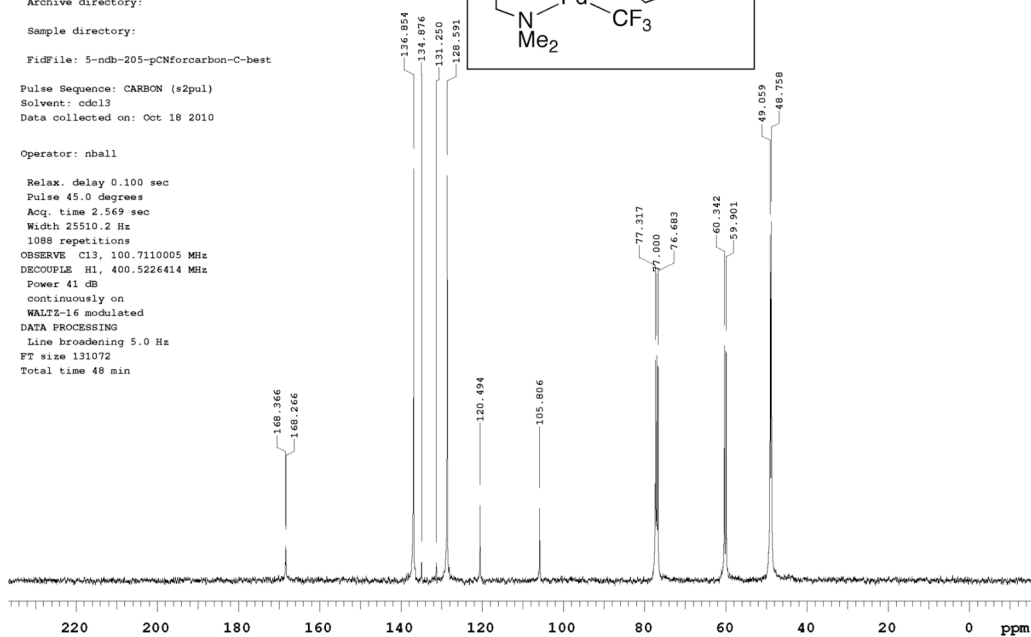

5-ndb-179forcarbompOMePdI-H

Sample Name:

Data Collected on:  
Co.Chem.LSA.UMich.edu-vmrs400  
Archive directory:

Sample directory:

FidFile: 5-ndb-179forcarbompOMePdI-H

Pulse Sequence: PROTON (s2pul)  
Solvent: cdcl3  
Data collected on: Oct 12 2010

Operator: nball

Relax. delay 0.500 sec  
Pulse 45.0 degrees  
Acq. time 3.500 sec  
Width 6410.3 Hz  
16 repetitions  
OBSERVE H1, 400.5206388 MHz  
DATA PROCESSING  
Line broadening 0.3 Hz  
FT size 65536  
Total time 1 min 12 sec

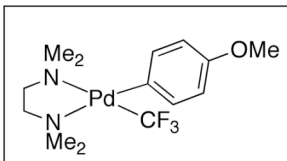

VARIAN

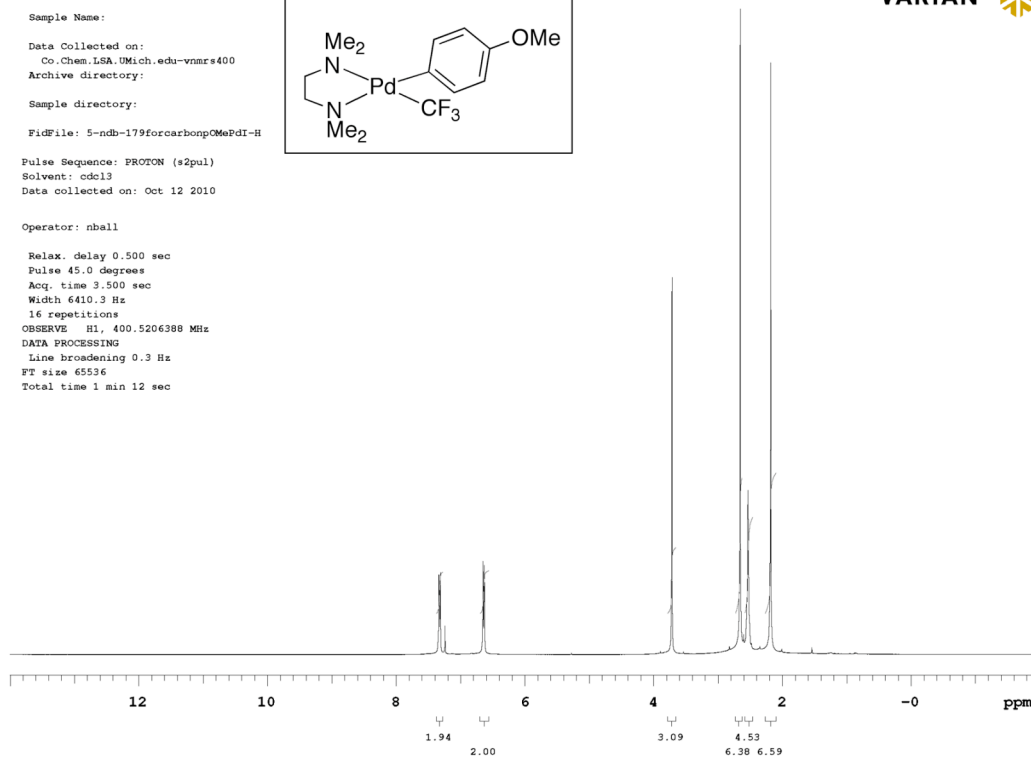

5-ndb-179-F  
 Sample Name:  
 Data Collected on:  
 Zr.Chem.LSA.UMich.edu-inova400  
 Archive directory:  
 Sample directory:  
 FidFile: 5-ndb-179-F  
 Pulse Sequence: FLUORINE (s2pul)  
 Solvent: cdc13  
 Data collected on: Aug 25 2010  
 Temp. 25.0 C / 298.1 K  
 Operator: nball  
 Relax. delay 1.000 sec  
 Pulse 30.0 degrees  
 Acq. time 0.757 sec  
 Width 86580.1 Hz  
 16 repetitions  
 OBSERVE F19, 376.3430777 MHz  
 DATA PROCESSING  
 Line broadening 0.5 Hz  
 FT size 131072  
 Total time 0 min 32 sec

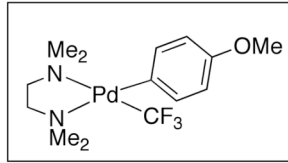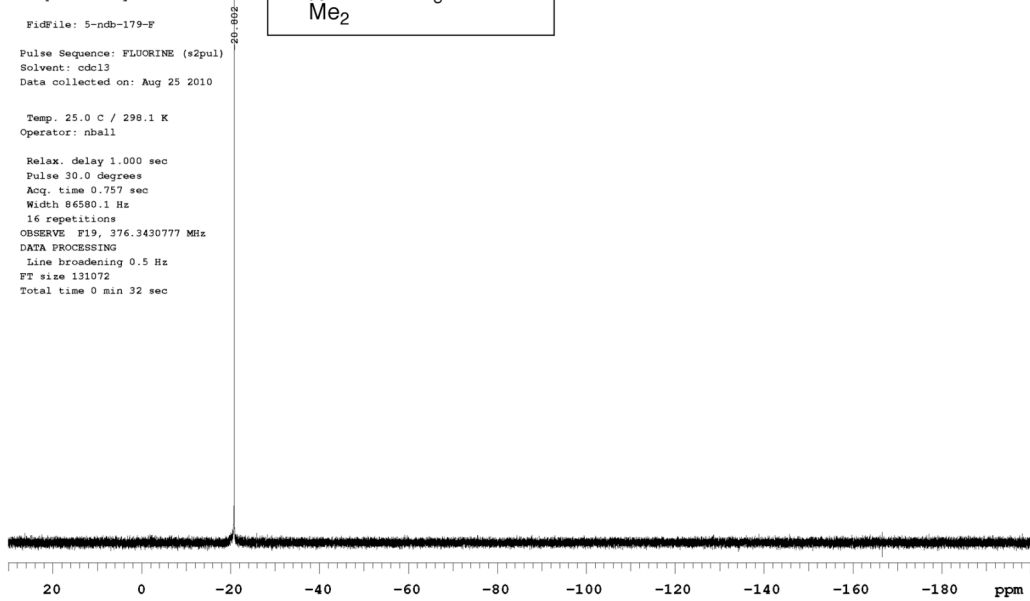

5-ndb-179forcarbonpOMePdI-C  
 Sample Name:  
 Data Collected on:  
 Co.Chem.LSA.UMich.edu-vnmrs400  
 Archive directory:  
 Sample directory:  
 FidFile: 5-ndb-179forcarbonpOMePdI-C  
 Pulse Sequence: CARBON (s2pul)  
 Solvent: cdc13  
 Data collected on: Oct 12 2010  
 Operator: nball  
 Relax. delay 0.100 sec  
 Pulse 45.0 degrees  
 Acq. time 2.569 sec  
 Width 25510.2 Hz  
 336 repetitions  
 OBSERVE C13, 100.7110044 MHz  
 DECOUPLE H1, 400.5226414 MHz  
 Power 41 dB  
 continuously on  
 WALTZ-16 modulated  
 DATA PROCESSING  
 Line broadening 3.0 Hz  
 FT size 131072  
 Total time 15 min

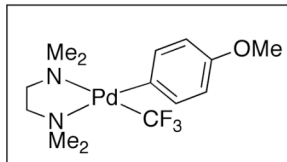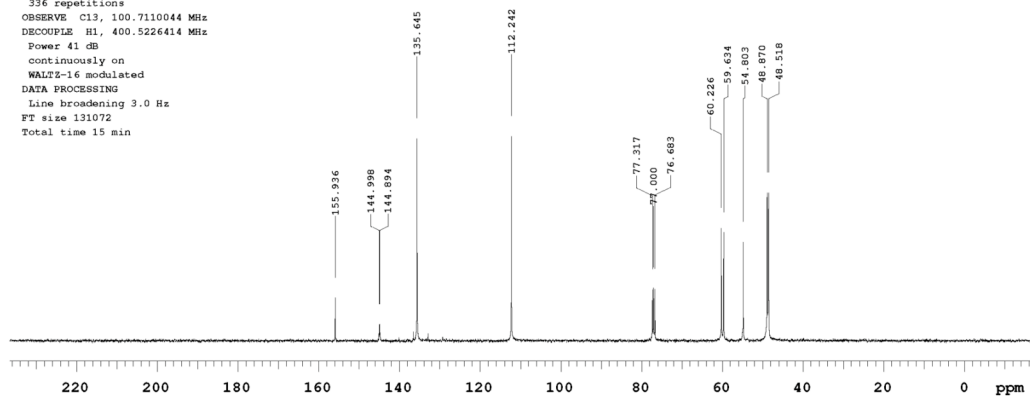



5-ndb-179forcarbopCMePdI-C  
Sample Name:  
Data Collected on:  
Co.Chem.LSA.UMich.edu-vnmr#400  
Archive directory:  
Sample directory:  
FidFile: 5-ndb-179forcarbopCMePdI-C  
Pulse Sequence: CARBON (\*2pul)  
Solvent: cdcl3  
Data collected on: Oct 12 2010

Operator: nball  
Relax. delay 0.100 sec  
Pulse 45.0 degrees  
Acq. time 2.569 sec  
Width 25510.2 Hz  
336 repetitions  
OBSERVE C13, 100.7110044 MHz  
DECOUPLE H1, 400.5226414 MHz  
Power 41 dB  
continuously on  
WALTZ-16 modulated  
DATA PROCESSING  
Line broadening 3.0 Hz  
FT size 131072  
Total time 15

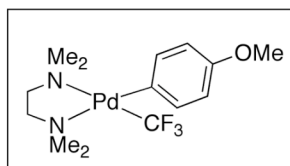

VARIAN

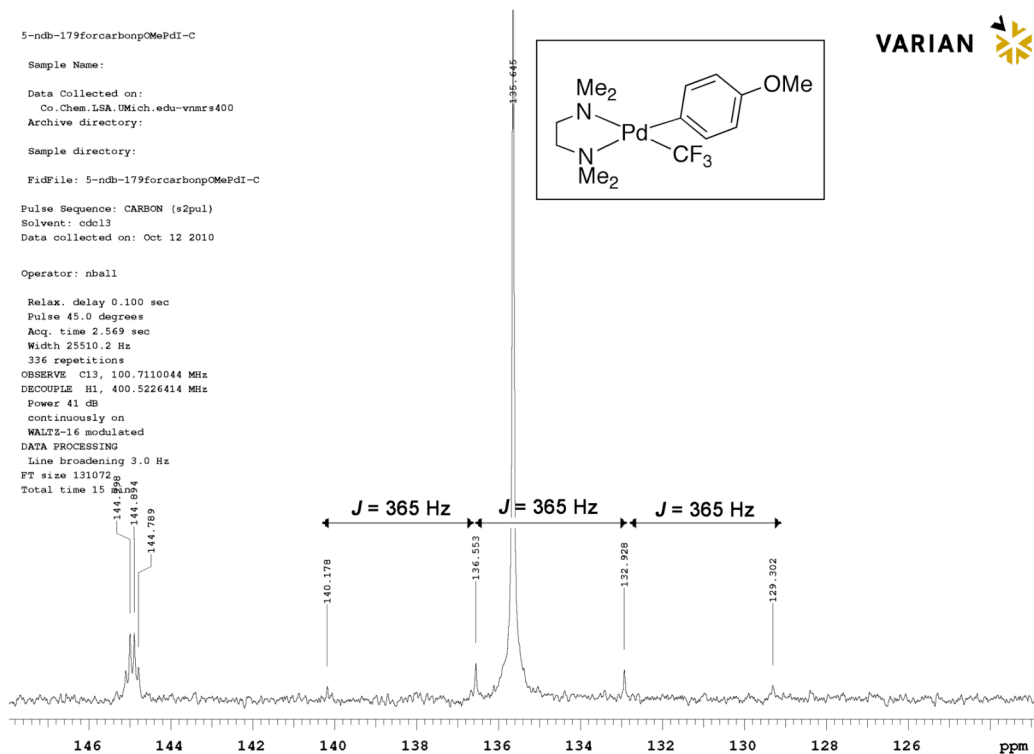

## STANDARD PROTON PARAMETERS

Sample Name:  
 Data Collected on:  
 Te-vnmrs500  
 Archive directory:  
 Sample directory:  
 FidFile: 5-ndb-136-H  
 Pulse Sequence: PROTON (s2pul)  
 Solvent: cdc13  
 Data collected on: Jun 27 2010

Temp. 25.0 C / 298.1 K  
 Operator: nball

Relax. delay 0.500 sec  
 Pulse 45.0 degrees  
 Acq. time 3.500 sec  
 Width 8012.8 Hz  
 16 repetitions  
 OBSERVE H1, 500.0931799 MHz  
 DATA PROCESSING  
 Line broadening 0.3 Hz  
 FT size 65536  
 Total time 1 min 12 sec

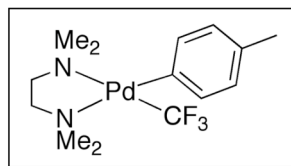

VARIAN 

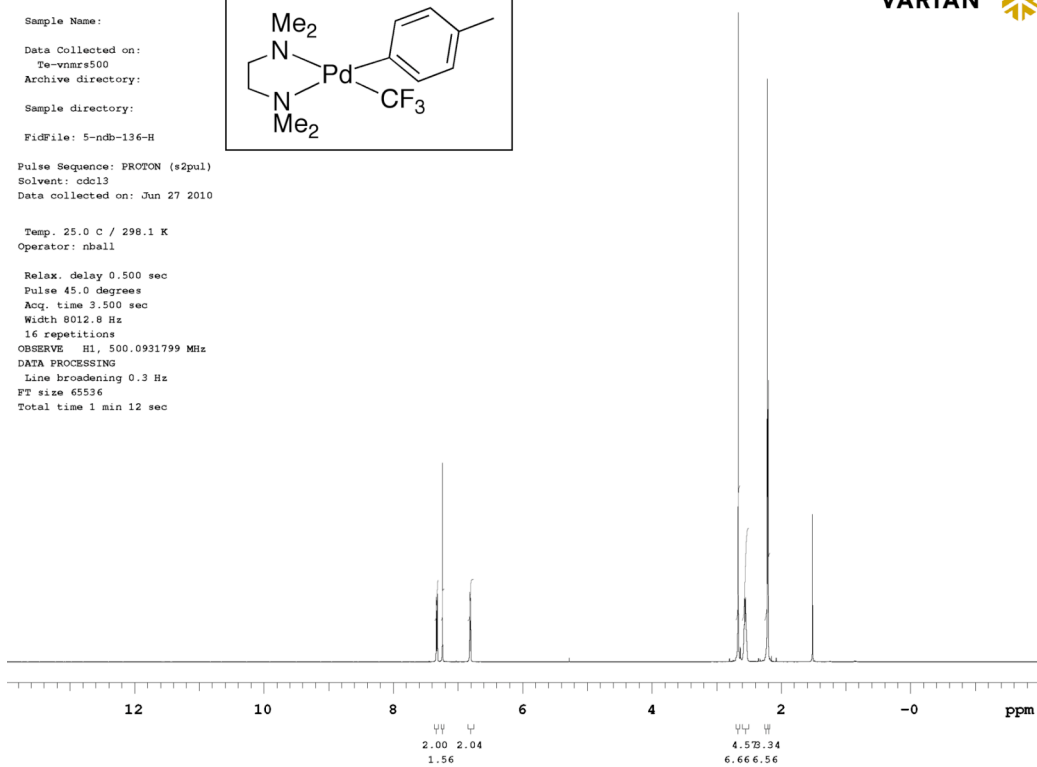

## STANDARD PROTON PARAMETERS

Sample Name:  
 Data Collected on:  
 Te-vnmrs500  
 Archive directory:  
 Sample directory:  
 FidFile: 5-ndb-136-F  
 Pulse Sequence: FLUORINE (s2pul)  
 Solvent: cdc13  
 Data collected on: Jun 27 2010

Temp. 25.0 C / 298.1 K  
 Operator: nball

Relax. delay 1.000 sec  
 Pulse 30.0 degrees  
 Acq. time 0.603 sec  
 Width 108.7 kHz  
 16 repetitions  
 OBSERVE F19, 470.5577317 MHz  
 DATA PROCESSING  
 Line broadening 1.5 Hz  
 FT size 131072  
 Total time 0 min 29 sec

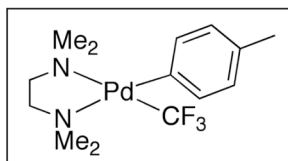

VARIAN 

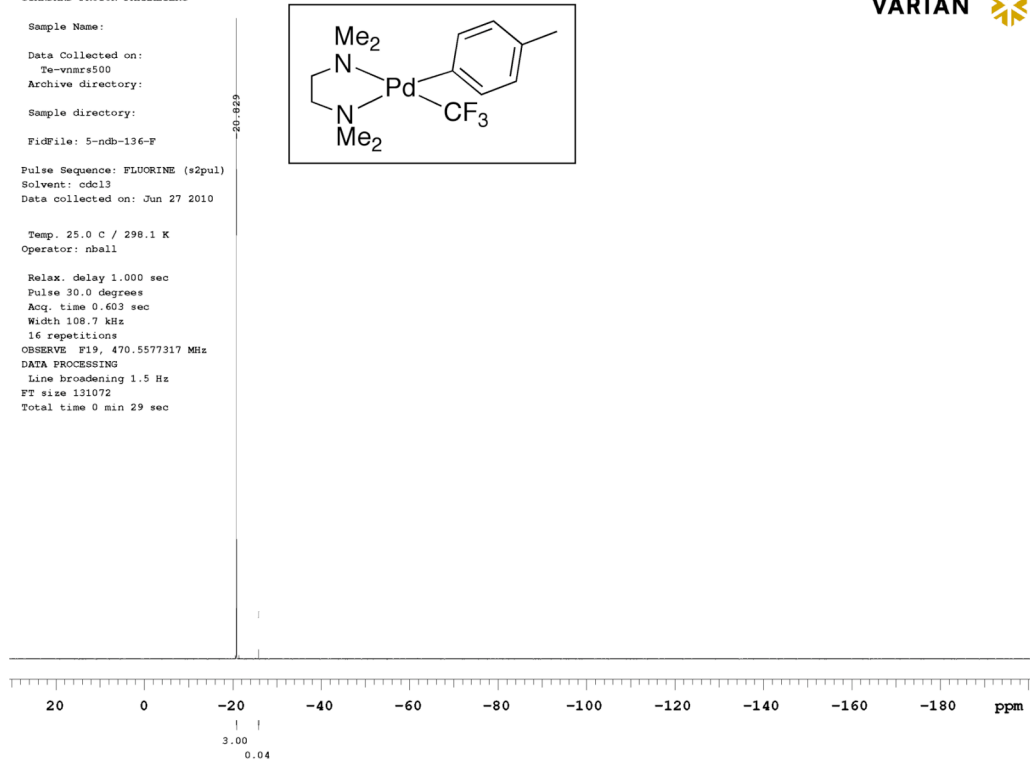

5-ndb-136forcarbon-C  
 Sample Name:  
 Data Collected on:  
 Co.Chem.LSA.UMich.edu-vnmr#400  
 Archive directory:  
 Sample directory:  
 FidFile: 5-ndb-136forcarbon-C  
 Pulse Sequence: CARBON (s2pul)  
 Solvent: cdcl3  
 Data collected on: Jun 28 2010

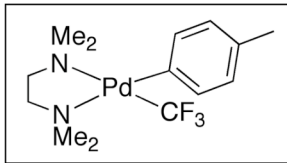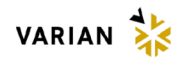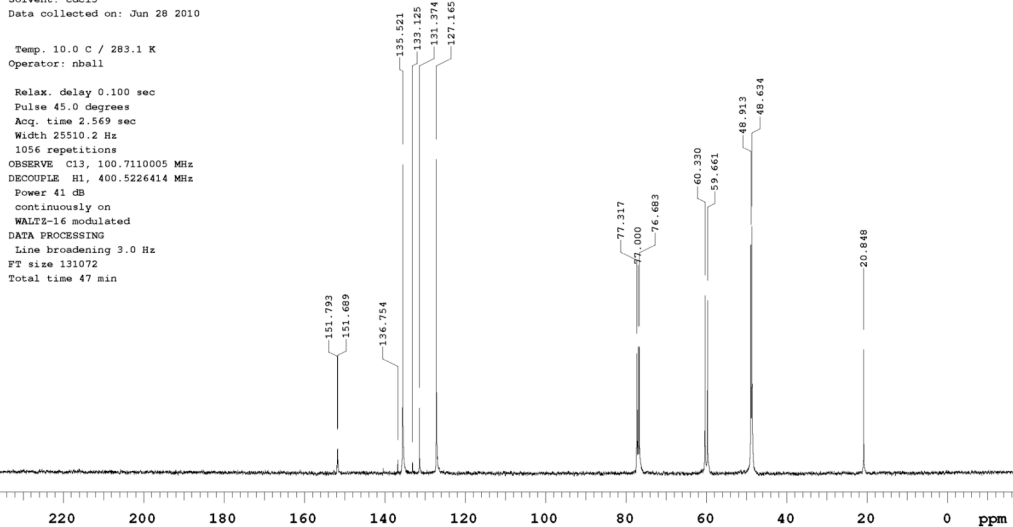

5-ndb-136forcarbon-C  
 Sample Name:  
 Data Collected on:  
 Co.Chem.LSA.UMich.edu-vnmr#400  
 Archive directory:  
 Sample directory:  
 FidFile: 5-ndb-136forcarbon-C  
 Pulse Sequence: CARBON (s2pul)  
 Solvent: cdcl3  
 Data collected on: Jun 28 2010

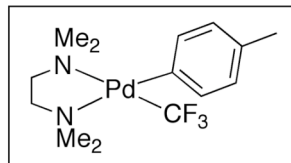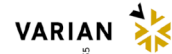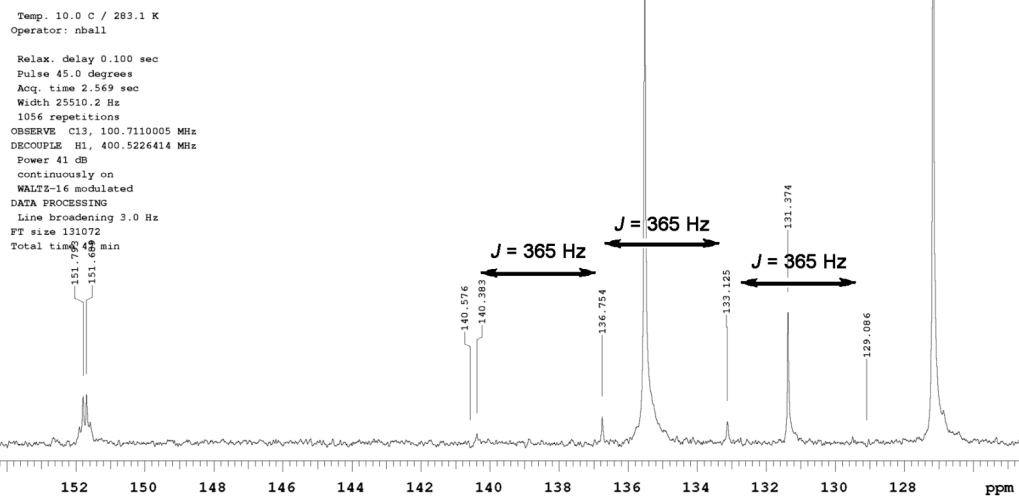

## STANDARD PROTON PARAMETERS

Sample Name:

Data Collected on:  
Co.Chem.LSA.UMich.edu-vnmrs400  
Archive directory:

Sample directory:

FidFile: 5-ndb-180-forcarbon-H

Pulse Sequence: PROTON (s2pul)  
Solvent: cdc13  
Data collected on: Aug 25 2010

Temp. 25.0 C / 298.1 K  
Operator: nbhall

Relax. delay 0.500 sec  
Pulse 45.0 degrees  
Acq. time 3.500 sec  
Width 6410.3 Hz  
16 repetitions  
OBSERVE H1, 400.5206387 MHz  
DATA PROCESSING  
Line broadening 0.3 Hz  
FT size 65536  
Total time 1 min 12 sec

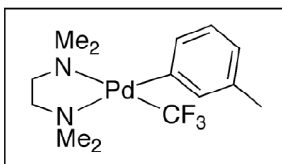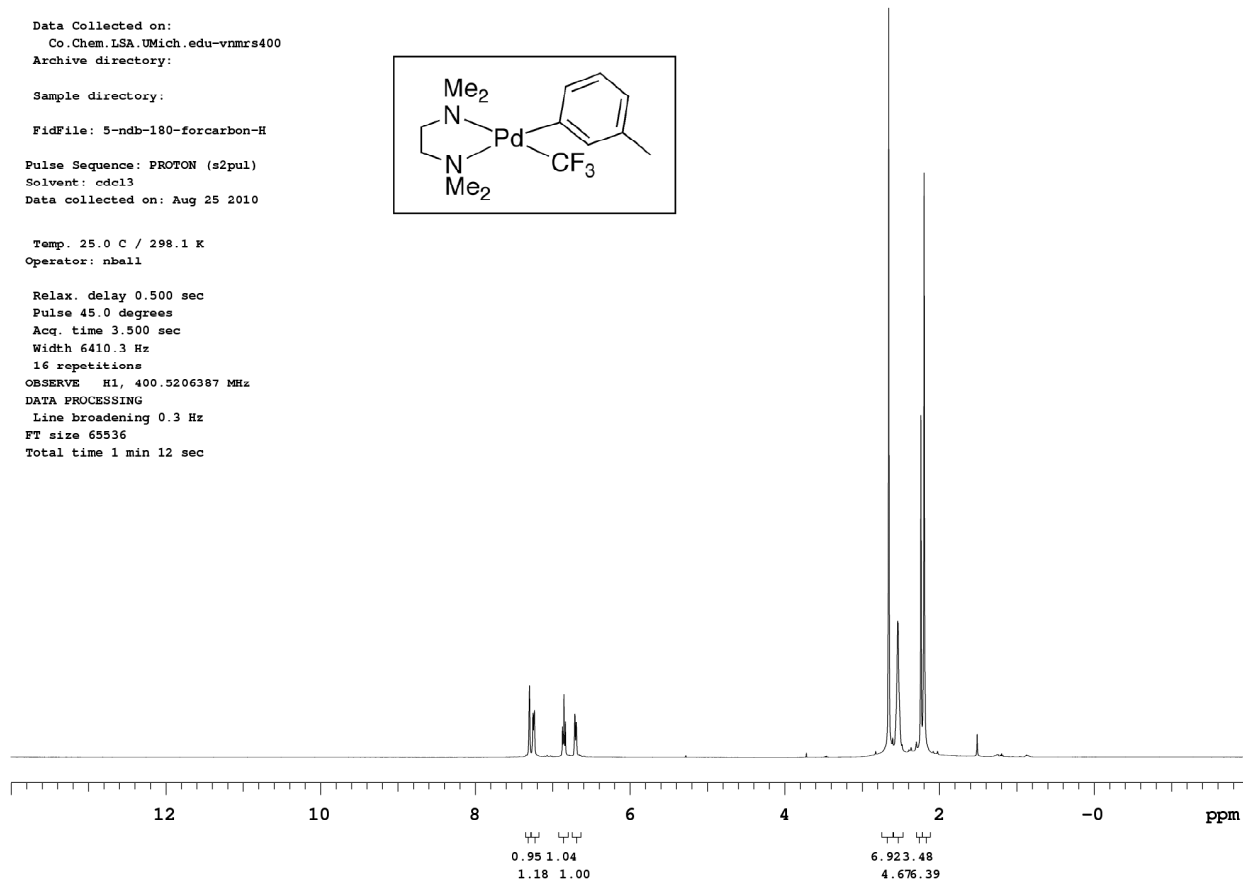

5-ndb-180-F

Sample Name:

Data Collected on:  
Zr.Chem.LSA.UMich.edu-inova400  
Archive directory:

Sample directory:

FidFile: 5-ndb-180-F

Pulse Sequence: FLUORINE (s2pul)  
Solvent: cdc13  
Data collected on: Aug 25 2010

Temp. 25.0 C / 298.1 K  
Operator: nbhall

Relax. delay 1.000 sec  
Pulse 30.0 degrees  
Acq. time 0.757 sec  
Width 86580.1 Hz  
16 repetitions  
OBSERVE F19, 376.3430708 MHz  
DATA PROCESSING  
Line broadening 0.5 Hz  
FT size 131072  
Total time 0 min 32 sec

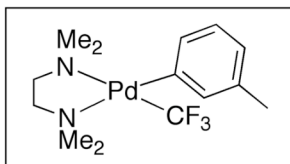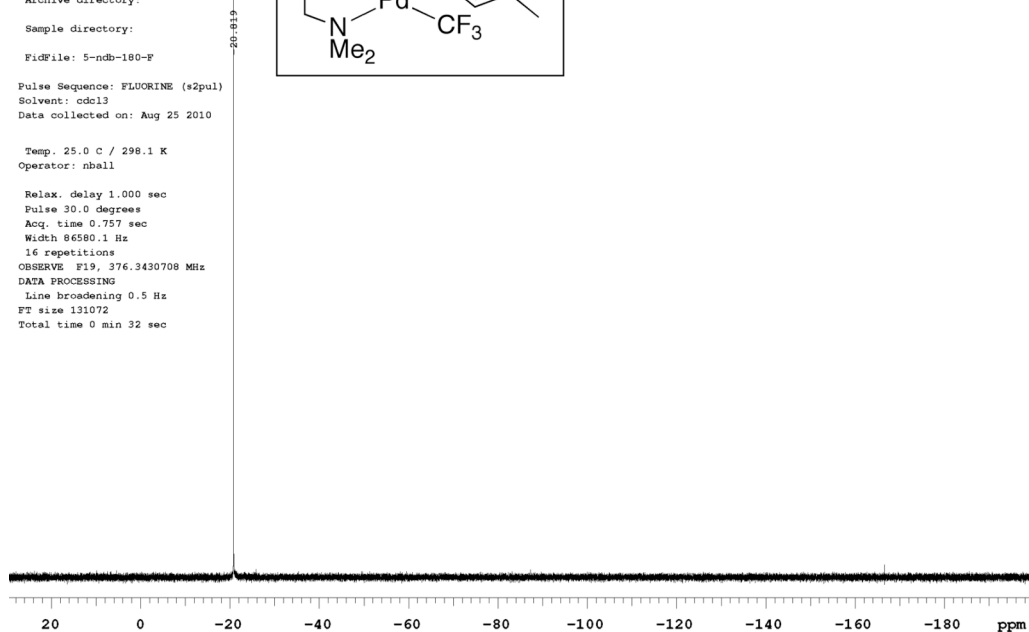

5-ndb-180-forcarbon-C

Sample Name:

Data Collected on:  
Co.Chem.LSA.UMich.edu-vnmr400  
Archive directory:

Sample directory:

FidFile: 5-ndb-180-forcarbon-C

Pulse Sequence: CARBON (s2pul)  
Solvent: cdcl3  
Data collected on: Aug 25 2010

Temp. 25.0 C / 298.1 K  
Operator: nball

Relax. delay 0.100 sec  
Pulse 45.0 degrees  
Acq. time 2.569 sec  
Width 25510.2 Hz  
3552 repetitions  
OBSERVE C13, 100.7109966 MHz  
DECOUPLE H1, 400.5226414 MHz  
Power 41 dB  
continuously on  
WALTZ-16 modulated  
DATA PROCESSING  
Line broadening 1.0 Hz  
FT size 131072  
Total time 2 hr, 38 min

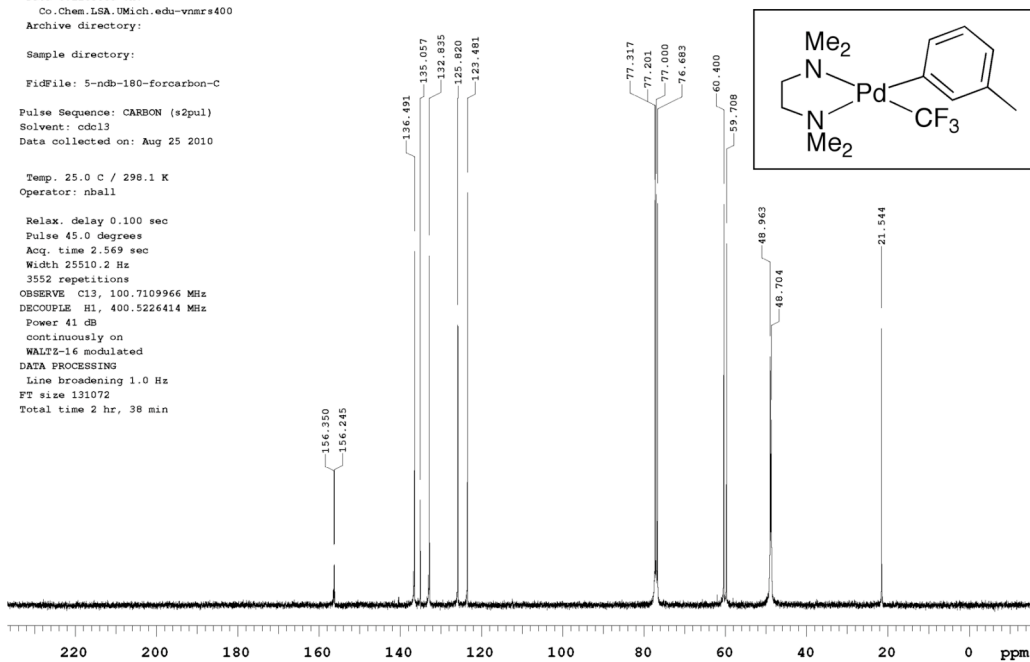

5-ndb-180-forcarbon-C

Sample Name:

Data Collected on:  
Co.Chem.LSA.UMich.edu-vnmr400  
Archive directory:

Sample directory:

FidFile: 5-ndb-180-forcarbon-C

Pulse Sequence: CARBON (s2pul)  
Solvent: cdcl3  
Data collected on: Aug 25 2010

Temp. 25.0 C / 298.1 K  
Operator: nball

Relax. delay 0.100 sec  
Pulse 45.0 degrees  
Acq. time 2.569 sec  
Width 25510.2 Hz  
3552 repetitions  
OBSERVE C13, 100.7109966 MHz  
DECOUPLE H1, 400.5226414 MHz  
Power 41 dB  
continuously on  
WALTZ-16 modulated  
DATA PROCESSING  
Line broadening 1.0 Hz  
FT size 131072  
Total time 2 hr, 38 min

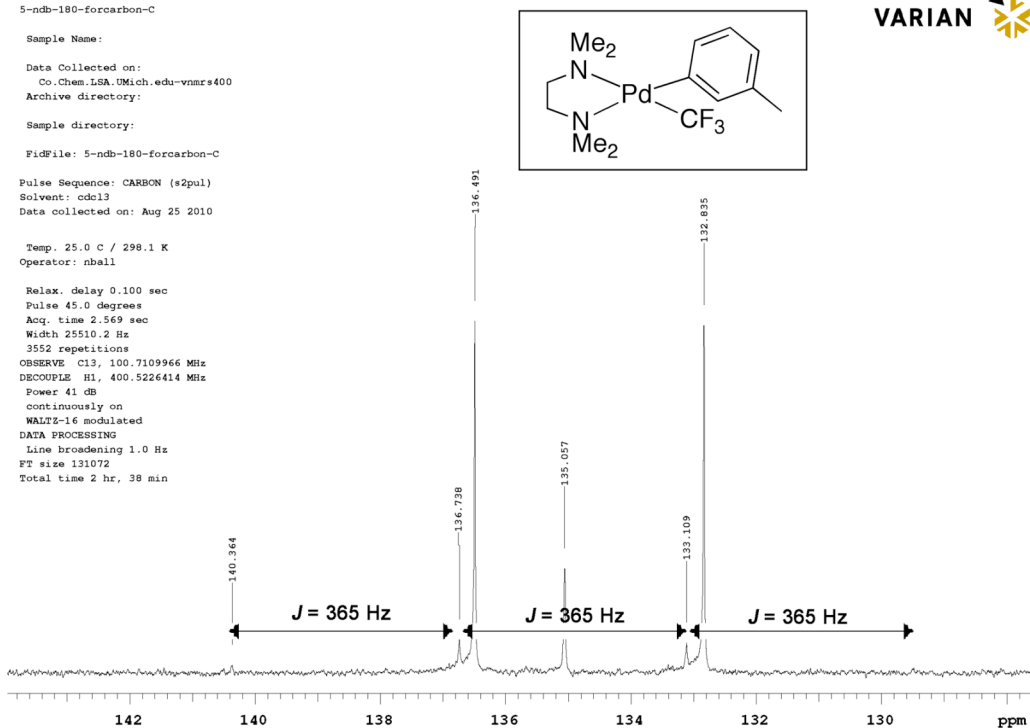

## STANDARD PROTON PARAMETERS

Sample Name:  
 Data Collected on:  
 Zr.Chem.LSA.UMich.edu-inova400  
 Archive directory:  
 Sample directory:  
 FidFile: 5-ndb-105-H  
 Pulse Sequence: PROTON (s2pul)  
 Solvent: cdcl3  
 Data collected on: May 13 2010

Temp. 25.0 C / 298.1 K  
 Operator: nball

Relax. delay 0.500 sec  
 Pulse 45.0 degrees  
 Acq. time 3.500 sec  
 Width 6399.5 Hz  
 16 repetitions  
 OBSERVE F1, 399.9649564 MHz  
 DATA PROCESSING  
 Line broadening 1.0 Hz  
 FT size 65536  
 Total time 1 min 12 sec

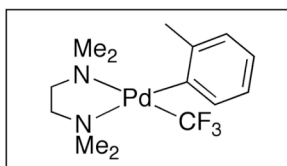

VARIAN

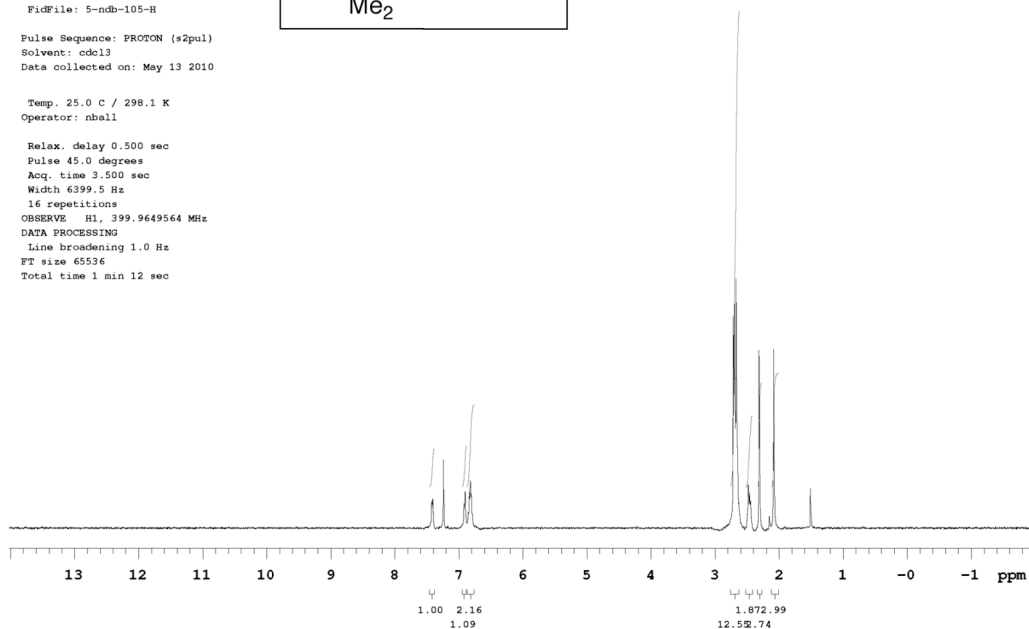

5-ndb-105-F

Sample Name:  
 Data Collected on:  
 Zr.Chem.LSA.UMich.edu-inova400  
 Archive directory:  
 Sample directory:  
 FidFile: 5-ndb-105-F  
 Pulse Sequence: FLUORINE (s2pul)  
 Solvent: cdcl3  
 Data collected on: May 13 2010

Temp. 25.0 C / 298.1 K  
 Operator: nball

Relax. delay 1.000 sec  
 Pulse 30.0 degrees  
 Acq. time 0.757 sec  
 Width 86580.1 Hz  
 16 repetitions  
 OBSERVE F19, 376.3420701 MHz  
 DATA PROCESSING  
 Line broadening 0.5 Hz  
 FT size 131072  
 Total time 0 min 32 sec

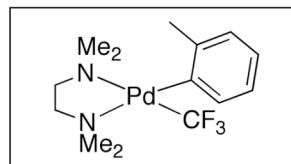

VARIAN

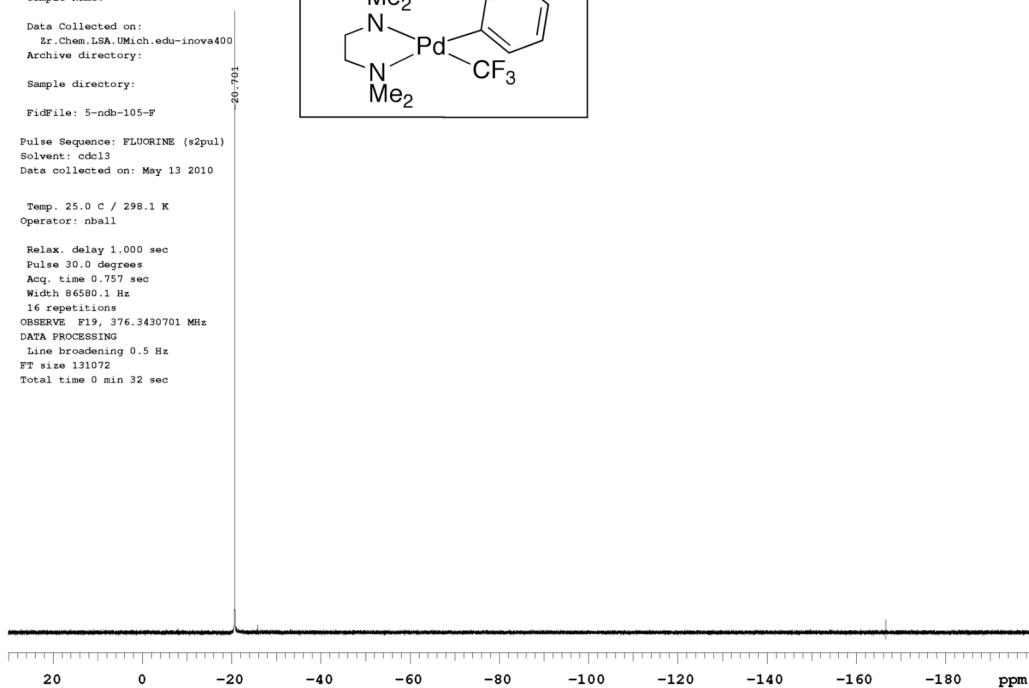

5-ndb-105forcarbon-C

Sample Name:

Data Collected on:  
Co.Chem.LSA.UMich.edu-vnmrs400  
Archive directory:

Sample directory:

FidFile: 5-ndb-105forcarbon-C

Pulse Sequence: CARBON (s2pul)  
Solvent: cdcl3  
Data collected on: May 19 2010

Temp. 25.0 C / 298.1 K  
Operator: nball

Relax. delay 0.100 sec  
Pulse 45.0 degrees  
Acq. time 2.569 sec  
Width 25510.2 Hz  
768 repetitions  
OBSERVE C13, 100.7110068 MHz  
DECOUPLE H1, 400.5226414 MHz  
Power 41 dB  
continuously on  
WALTZ-16 modulated  
DATA PROCESSING  
Line broadening 1.0 Hz  
FT size 131072  
Total time 34 min

VARIAN 

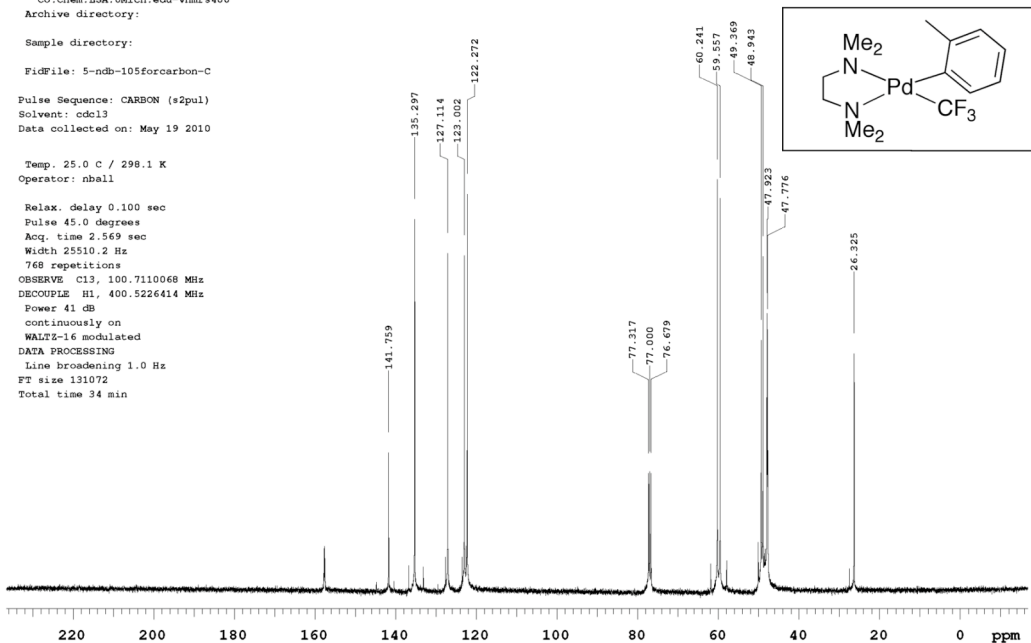

5-ndb-105forcarbon-C

Sample Name:

Data Collected on:  
Co.Chem.LSA.UMich.edu-vnmrs400  
Archive directory:

Sample directory:

FidFile: 5-ndb-105forcarbon-C

Pulse Sequence: CARBON (s2pul)  
Solvent: cdcl3  
Data collected on: May 19 2010

Temp. 25.0 C / 298.1 K  
Operator: nball

Relax. delay 0.100 sec  
Pulse 45.0 degrees  
Acq. time 2.569 sec  
Width 25510.2 Hz  
768 repetitions  
OBSERVE C13, 100.7110068 MHz  
DECOUPLE H1, 400.5226414 MHz  
Power 41 dB  
continuously on  
WALTZ-16 modulated  
DATA PROCESSING  
Line broadening 1.0 Hz  
FT size 131072  
Total time 34 min

VARIAN 

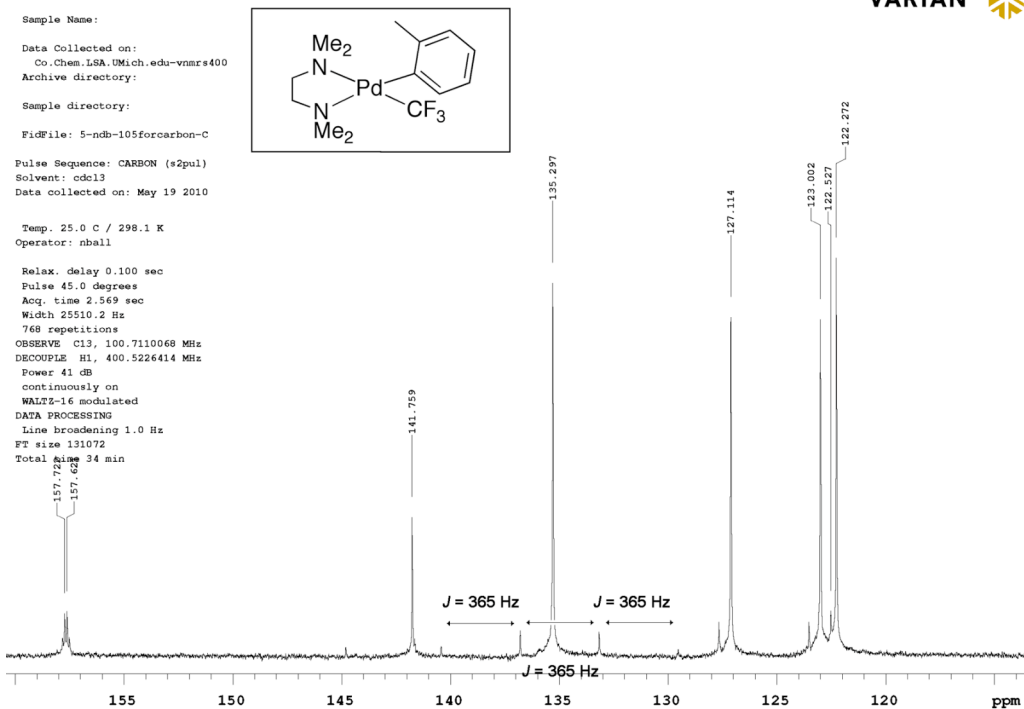

5-ndb-178-H

Sample Name:

Data Collected on:  
Co.Chem.LSA.UMich.edu-vnmrs400  
Archive directory:

Sample directory:

FidFile: 5-ndb-178-H

Pulse Sequence: PROTON (s2pul)  
Solvent: cdcl3  
Data collected on: Sep 27 2010

Temp. 25.0 C / 298.1 K  
Operator: nball

Relax. delay 0.500 sec  
Pulse 45.0 degrees  
Acq. time 3.500 sec  
Width 6410.3 Hz  
16 repetitions  
OBSERVE H1, 400.5206394 MHz  
DATA PROCESSING  
Line broadening 0.3 Hz  
FT size 65536  
Total time 1 min 12 sec

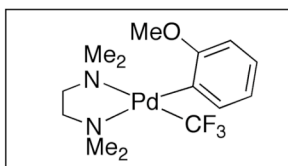

VARIAN

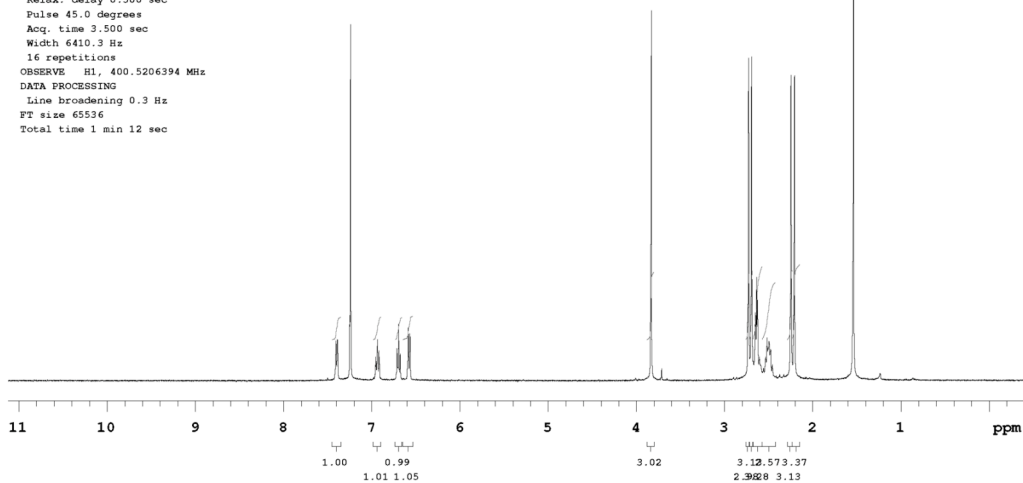

STANDARD FLUORINE PARAMETERS

Sample Name:

Data Collected on:  
Co.Chem.LSA.UMich.edu-vnmrs400  
Archive directory:

Sample directory:

FidFile: 5-ndb-178-F

Pulse Sequence: FLUORINE (s2pul)  
Solvent: cdcl3  
Data collected on: Sep 27 2010

Temp. 25.0 C / 298.1 K  
Operator: nball

Relax. delay 1.000 sec  
Pulse 30.0 degrees  
Acq. time 0.734 sec  
Width 89285.7 Hz  
32 repetitions  
OBSERVE F19, 376.8659339 MHz  
DATA PROCESSING  
Line broadening 1.5 Hz  
FT size 131072  
Total time 0 min 59 sec

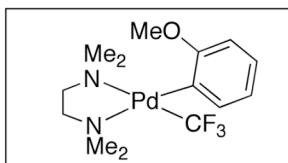

VARIAN

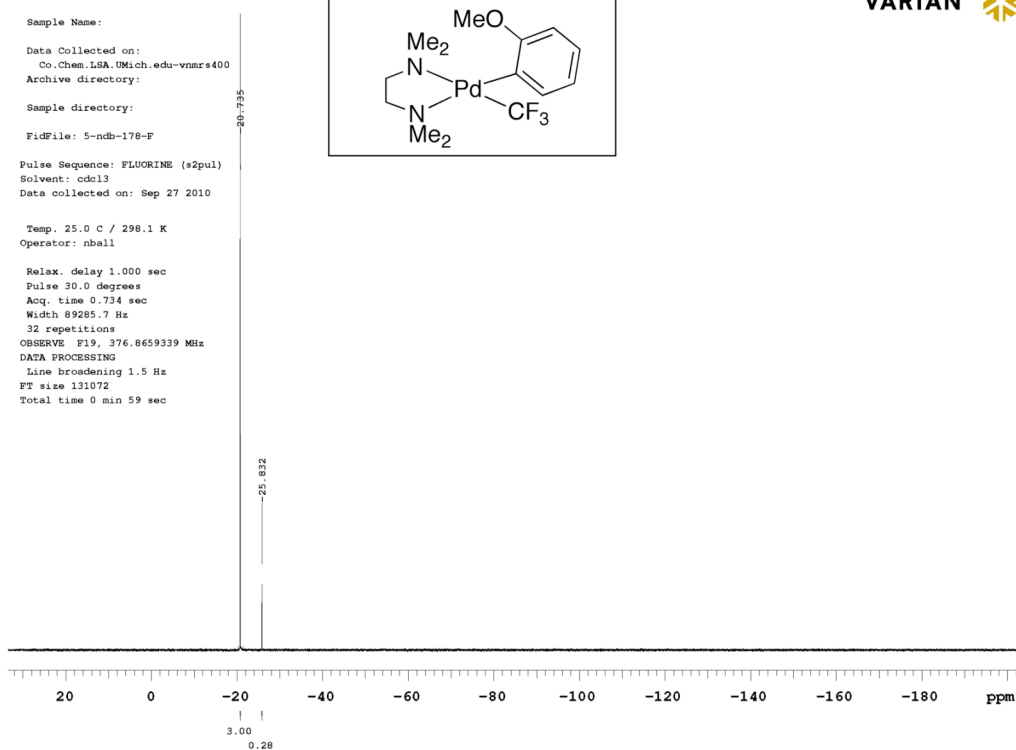



## STANDARD CARBON PARAMETERS

Sample Name:  
 Data Collected on:  
 Co.Chem.LSA.UMich.edu-vnmrs400  
 Archive directory:  
 Sample directory:  
 FidFile: 5-ndb-178forcarbon-H

Pulse Sequence: CARBON (\*2pul)  
 Solvent: cdc13  
 Data collected on: Sep 29 2010

Temp. 25.0 C / 298.1 K  
 Operator: nball

Relax. delay 0.100 sec  
 Pulse 45.0 degrees  
 Acq. time 2.569 sec  
 Width 25510.2 Hz

1968 repetitions  
 OBSERVE C13, 100.7110001 MHz  
 DECOUPLE H1, 400.5226414 MHz  
 Power 41 dB  
 continuously on  
 WALTZ-16 modulated  
 DATA PROCESSING  
 Line broadening 1.0 Hz  
 FT size 131072  
 Total time 1 hr, 27 min

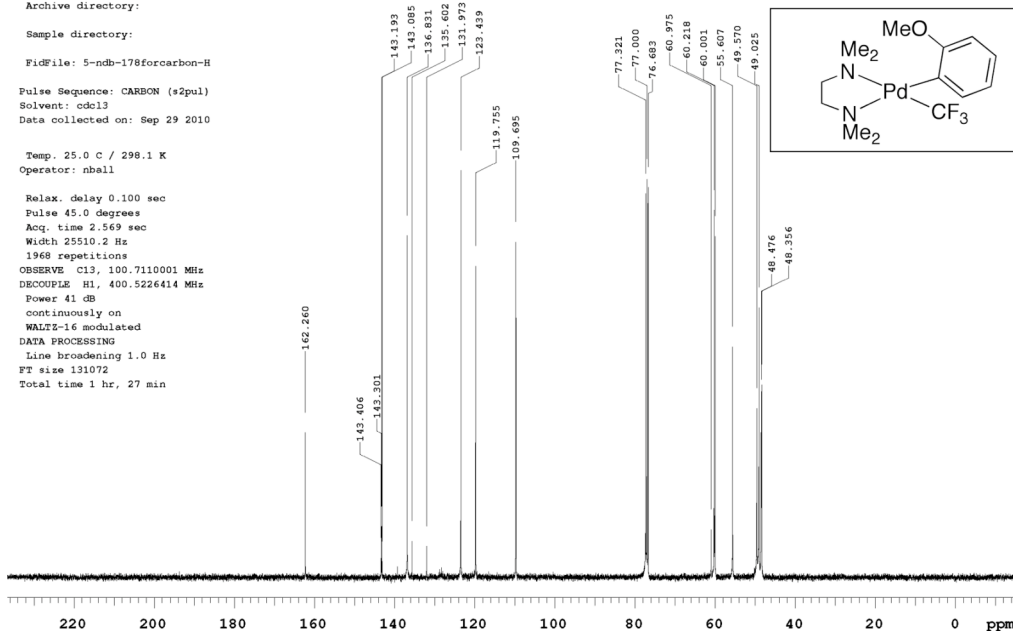

## STANDARD CARBON PARAMETERS

Sample Name:  
 Data Collected on:  
 Co.Chem.LSA.UMich.edu-vnmrs400  
 Archive directory:  
 Sample directory:  
 FidFile: 5-ndb-178forcarbon-H

Pulse Sequence: CARBON (\*2pul)  
 Solvent: cdc13  
 Data collected on: Sep 29 2010

Temp. 25.0 C / 298.1 K  
 Operator: nball

Relax. delay 0.100 sec  
 Pulse 45.0 degrees  
 Acq. time 2.569 sec  
 Width 25510.2 Hz

1968 repetitions  
 OBSERVE C13, 100.7110001 MHz  
 DECOUPLE H1, 400.5226414 MHz  
 Power 41 dB  
 continuously on  
 WALTZ-16 modulated  
 DATA PROCESSING  
 Line broadening 1.0 Hz  
 FT size 131072  
 Total time 1 hr, 27 min

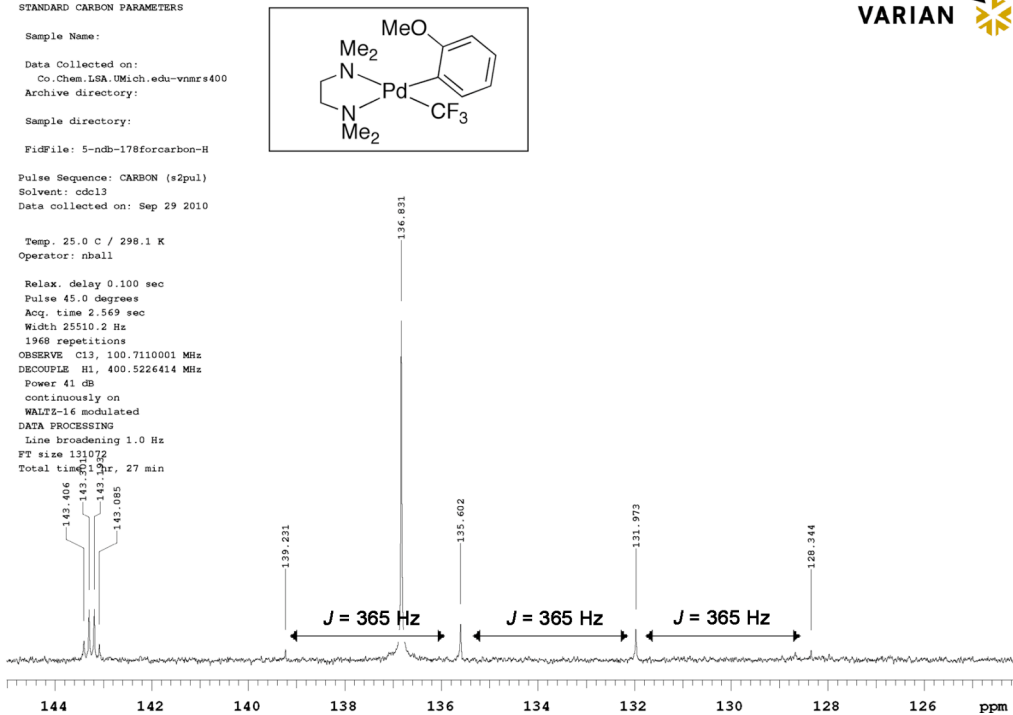

## STANDARD PROTON PARAMETERS

Sample Name:  
 Data Collected on:  
 Zr.Chem.LSA.UMich.edu-inova400  
 Archive directory:  
 Sample directory:  
 FidFile: 5-ndb-114-PdIVp-tol-H  
 Pulse Sequence: PROTON (s2pul)  
 Solvent: cd3cn  
 Data collected on: May 26 2010

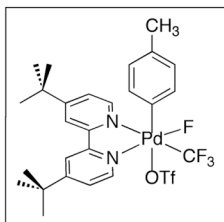

VARIAN

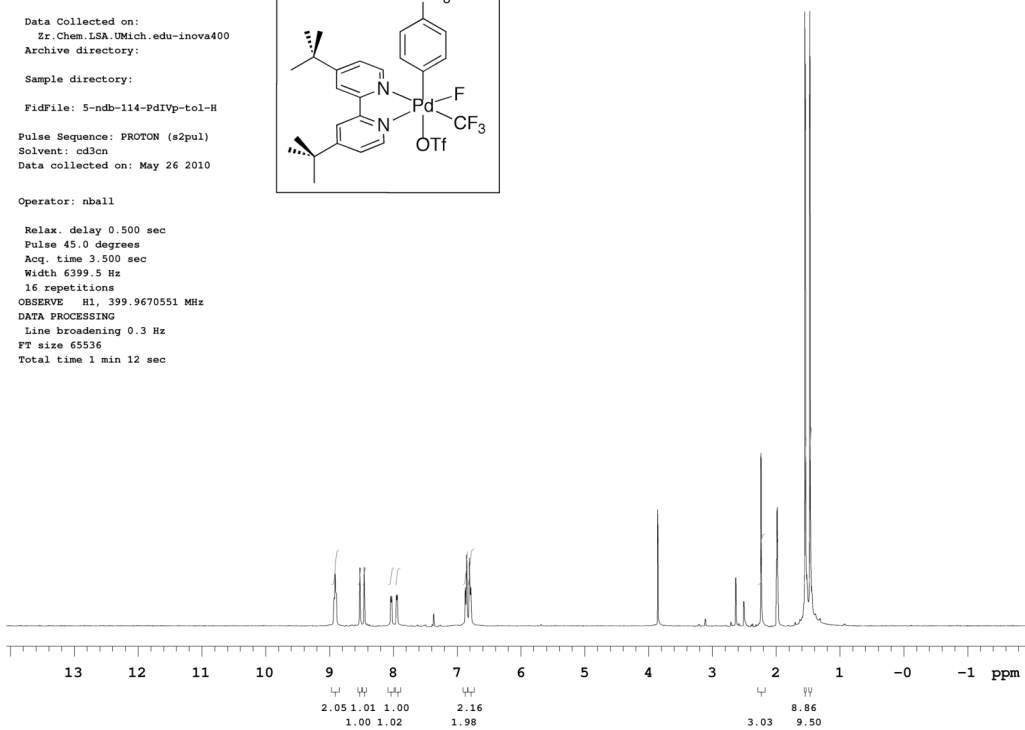

## STANDARD PROTON PARAMETERS

Sample Name:  
 Data Collected on:  
 Zr.Chem.LSA.UMich.edu-inova400  
 Archive directory:  
 Sample directory:  
 FidFile: 5-ndb-114-PdIVp-tol-F  
 Pulse Sequence: FLUORINE (s2pul)  
 Solvent: cd3cn  
 Data collected on: May 26 2010

Operator: nball  
 Relax. delay 1.000 sec  
 Pulse 30.0 degrees  
 Acq. time 2.000 sec  
 Width 116.6 kHz  
 32 repetitions  
 OBSERVE F19, 376.3450448 MHz  
 DATA PROCESSING  
 Line broadening 0.5 Hz  
 FT size 524288  
 Total time 1 min 42 sec

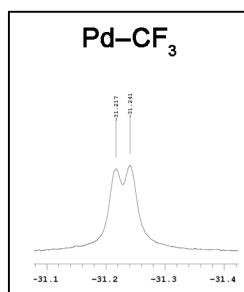

VARIAN

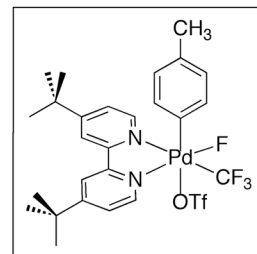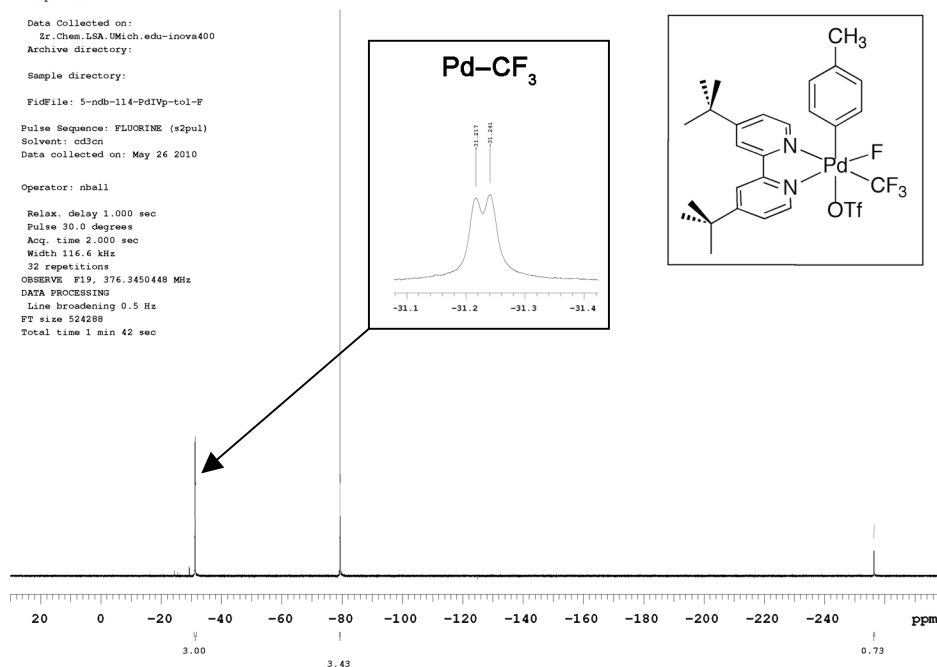

STANDARD PROTON PARAMETERS

Sample Name:  
 Data Collected on:  
 Zr.Chem.LSA.UMich.edu-inova400  
 Archive directory:  
 Sample directory:  
 FidFile: 5-ndb-112-H  
 Pulse Sequence: PROTON (s2pul)  
 Solvent: cd3cn  
 Data collected on: Jun 1 2010  
 Temp. 25.0 C / 298.1 K  
 Operator: nball  
 Relax. delay 0.500 sec  
 Pulse 45.0 degrees  
 Acq. time 3.500 sec  
 Width 6399.5 Hz  
 16 repetitions  
 OBSERVE H1, 399.9670804 MHz  
 DATA PROCESSING  
 Line broadening 0.3 Hz  
 FT size 65536  
 Total time 1 min 12 sec

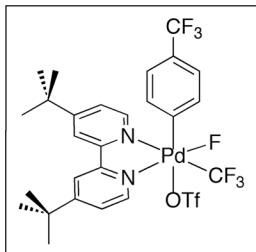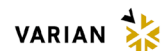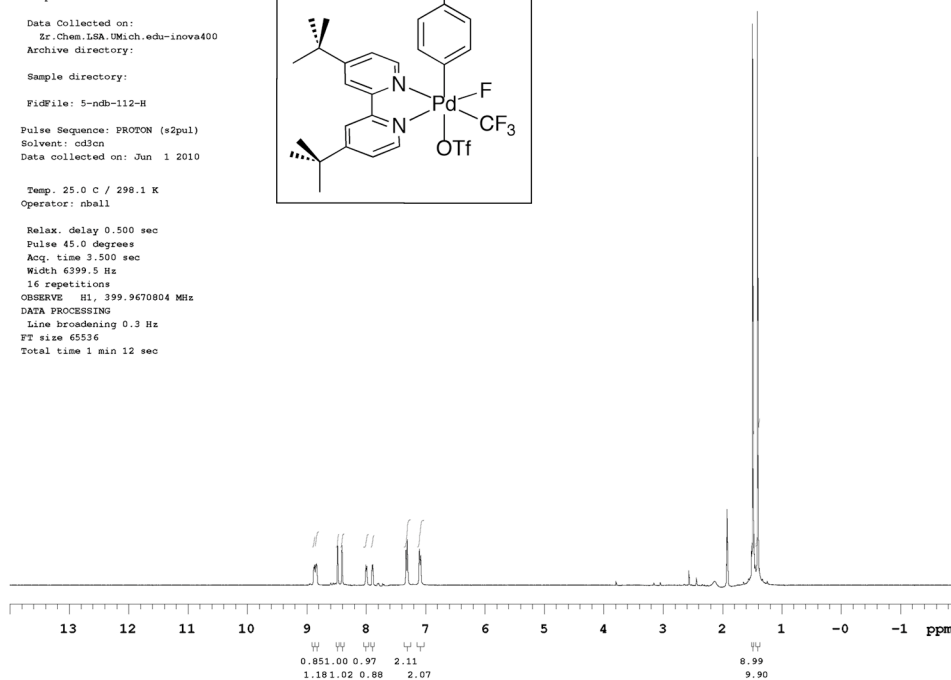

STANDARD PROTON PARAMETERS

Sample Name:  
 Data Collected on:  
 Zr.Chem.LSA.UMich.edu-inova400  
 Archive directory:  
 Sample directory:  
 FidFile: 5-ndb-112-F  
 Pulse Sequence: FLUORINE (s2pul)  
 Solvent: cd3cn  
 Data collected on: Jun 1 2010  
 Temp. 25.0 C / 298.1 K  
 Operator: nball  
 Relax. delay 1.000 sec  
 Pulse 30.0 degrees  
 Acq. time 0.600 sec  
 Width 109.1 kHz  
 32 repetitions  
 OBSERVE F19, 376.3450686 MHz  
 DATA PROCESSING  
 Line broadening 0.5 Hz  
 FT size 131072  
 Total time 0 min 55 sec

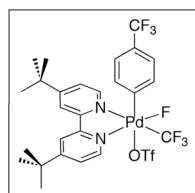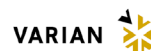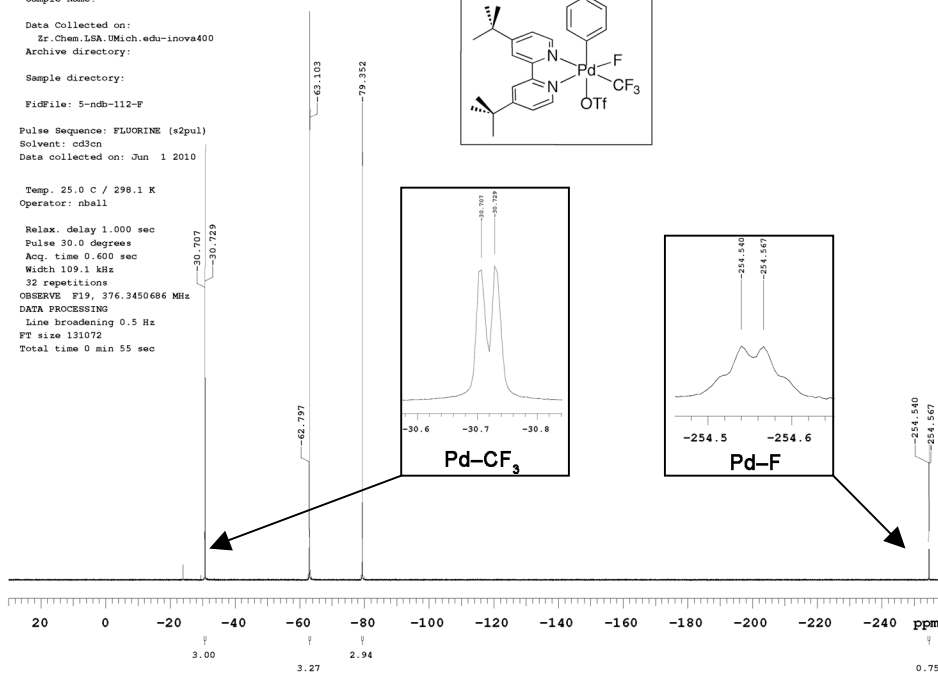

YY-3-79-TFA  
 Sample Name:  
 Data Collected on:  
 Co Chem 15A, UMich, edu-vnmr0400  
 Archive directory:  
 Sample directory:  
 Fidfile: YY-3-79-TFA  
 Pulse Sequence: FIDF04 (s2pul)  
 Solvent: cdcl3  
 Date collected on: Oct 8 2010

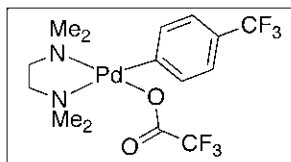

VARIAN

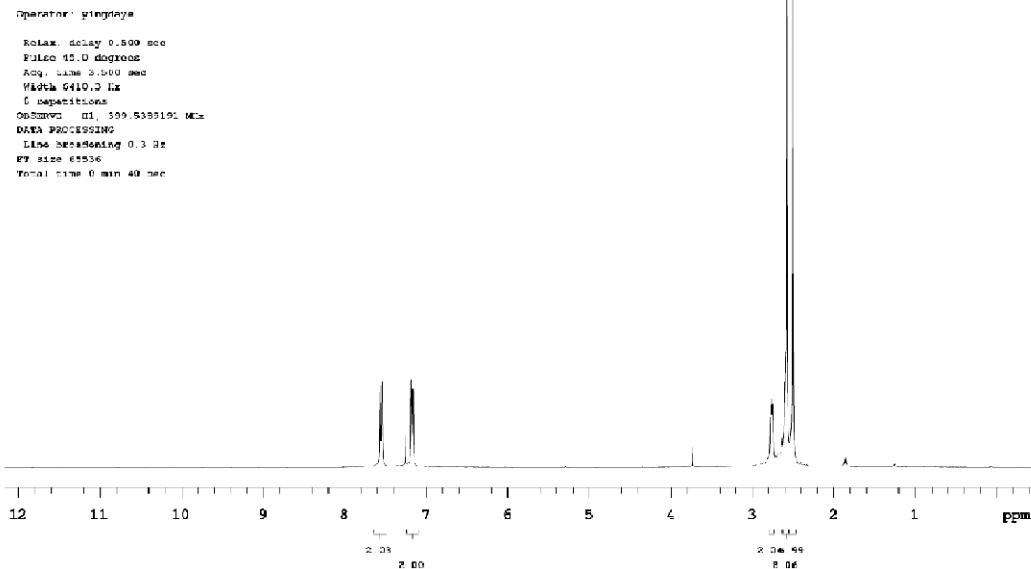

YY-3-79-TFA-F  
 Sample Name:  
 Data Collected on:  
 Co Chem 15A, UMich, edu-vnmr0400  
 Archive directory:  
 Sample directory:  
 Fidfile: YY-3-79-TFA-F  
 Pulse Sequence: FLUORINE (s2pul)  
 Solvent: cdcl3  
 Date collected on: Oct 14 2010

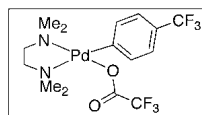

VARIAN

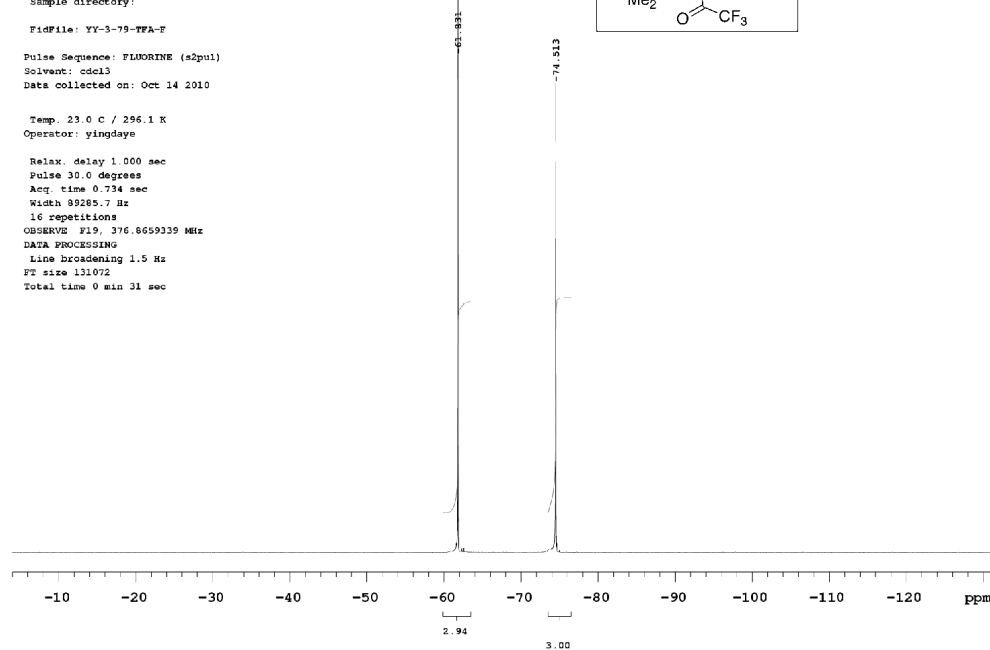

YY-3-79-TFA-C  
 Sample Name:  
 Data Collected on:  
 Ga.Chem.LSA.UMich.edu-vmrs400  
 Archive directory:  
 Sample directory:  
 Fidfile: YY-3-79-TFA-C  
 Pulse Sequence: CARBON (s2pul)  
 Solvent: cdc13  
 Data collected on: Oct 15 2010

Temp. 25.0 C / 298.1 K  
 Operator: yingdays  
 Relax. delay 0.100 sec  
 Pulse 45.0 degrees  
 Acq. time 2.559 sec  
 Width 25510.2 Hz  
 1184 repetitions  
 OBSERVE Ch1, 100.4641423 MHz  
 DECOUPLE H1, 399.5409236 MHz  
 Power 35 dB  
 continuously on  
 WALTZ-16 modulated  
 DATA PROCESSING  
 Line broadening 1.0 Hz  
 FT size 131072  
 Total time 52 min

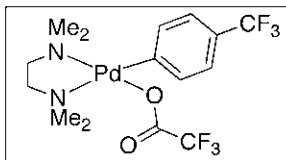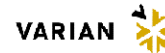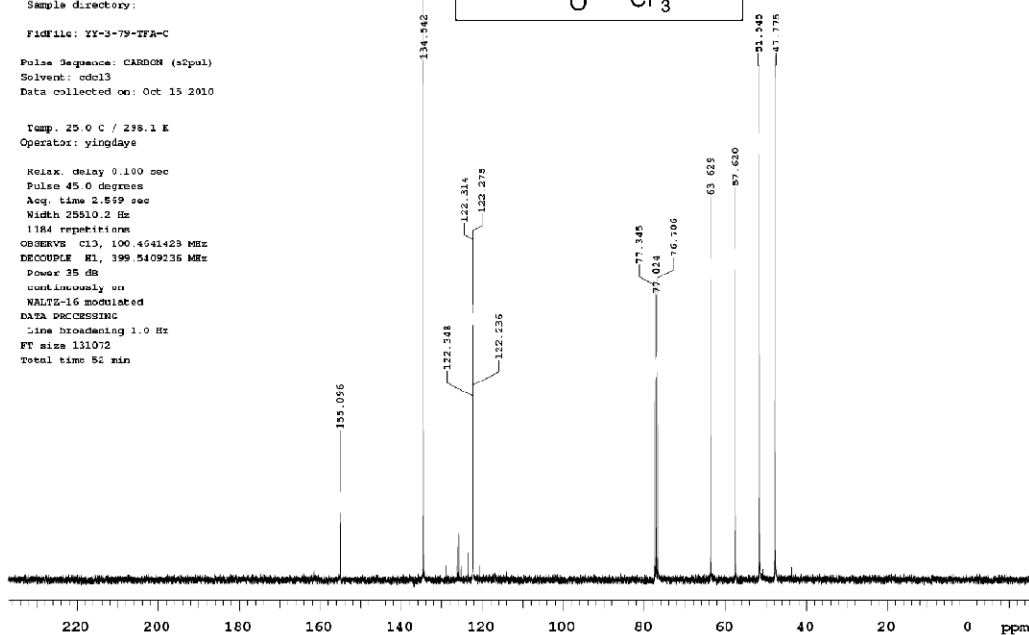

YY-3-79-TFA-C  
 Sample Name:  
 Data Collected on:  
 Ga.Chem.LSA.UMich.edu-vmrs400  
 Archive directory:  
 Sample directory:  
 Fidfile: YY-3-79-TFA-C  
 Pulse Sequence: CARBON (s2pul)  
 Solvent: cdc13  
 Data collected on: Oct 15 2010

Temp. 25.0 C / 298.1 K  
 Operator: yingdays  
 Relax. delay 0.100 sec  
 Pulse 45.0 degrees  
 Acq. time 2.559 sec  
 Width 25510.2 Hz  
 1184 repetitions  
 OBSERVE Ch1, 100.4641423 MHz  
 DECOUPLE H1, 399.5409236 MHz  
 Power 35 dB  
 continuously on  
 WALTZ-16 modulated  
 DATA PROCESSING  
 Line broadening 1.0 Hz  
 FT size 131072  
 Total time 52 min

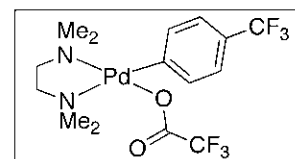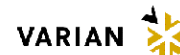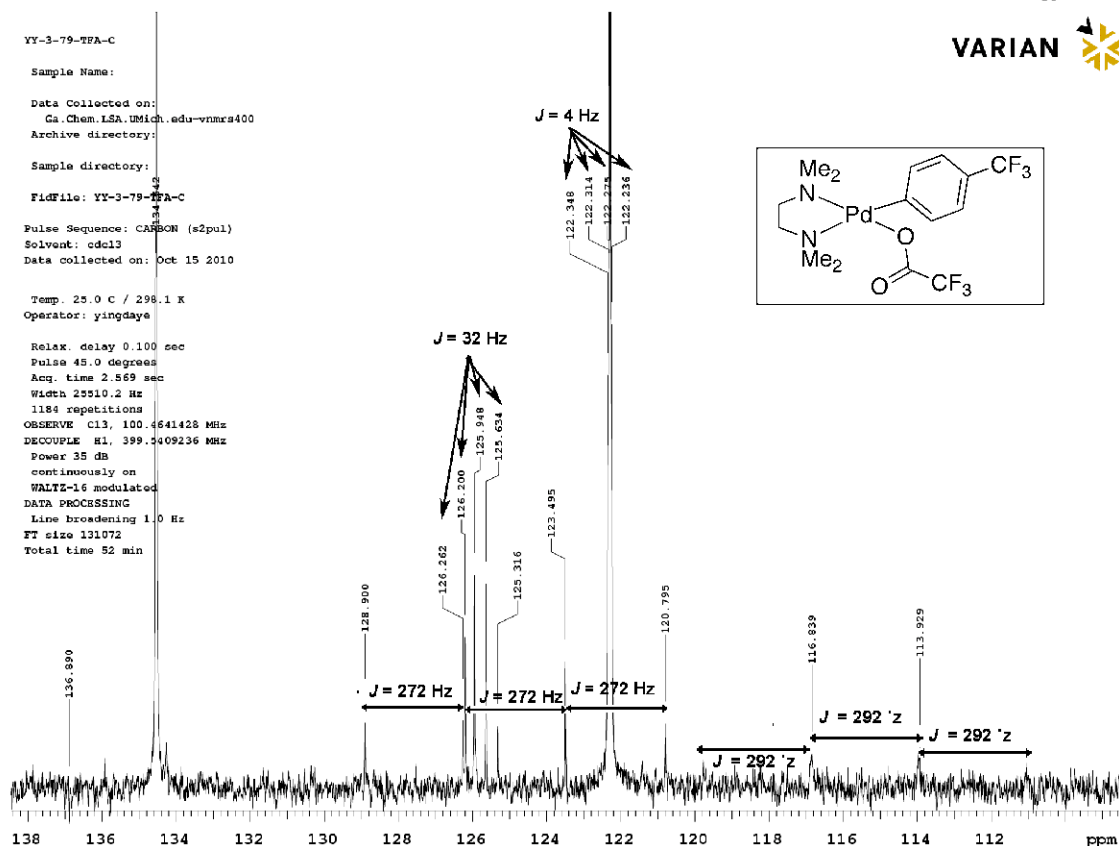

YV-3-79-OAc-H

Sample Name:

Data Collected on:  
Co.Chem.LSA.UMich.edu-vmms400  
Archive directory:

Sample directory:

FidFile: YV-3-79-OAc-H

Pulse Sequence: PROTON (s2pul)  
Solvent: cdcl3  
Data collected on: Oct 14 2010

Temp. 23.0 C / 296.1 K  
Operator: yingdaye

Relax. delay 0.500 sec  
Pulse 45.0 degrees  
Acq. time 3.500 sec  
Width 6410.3 Hz  
8 repetitions  
OBSERVE H1, 400.5206318 MHz  
DATA PROCESSING  
Line broadening 0.3 Hz  
FT size 65536  
Total time 0 min 40 sec

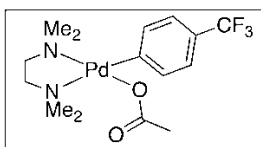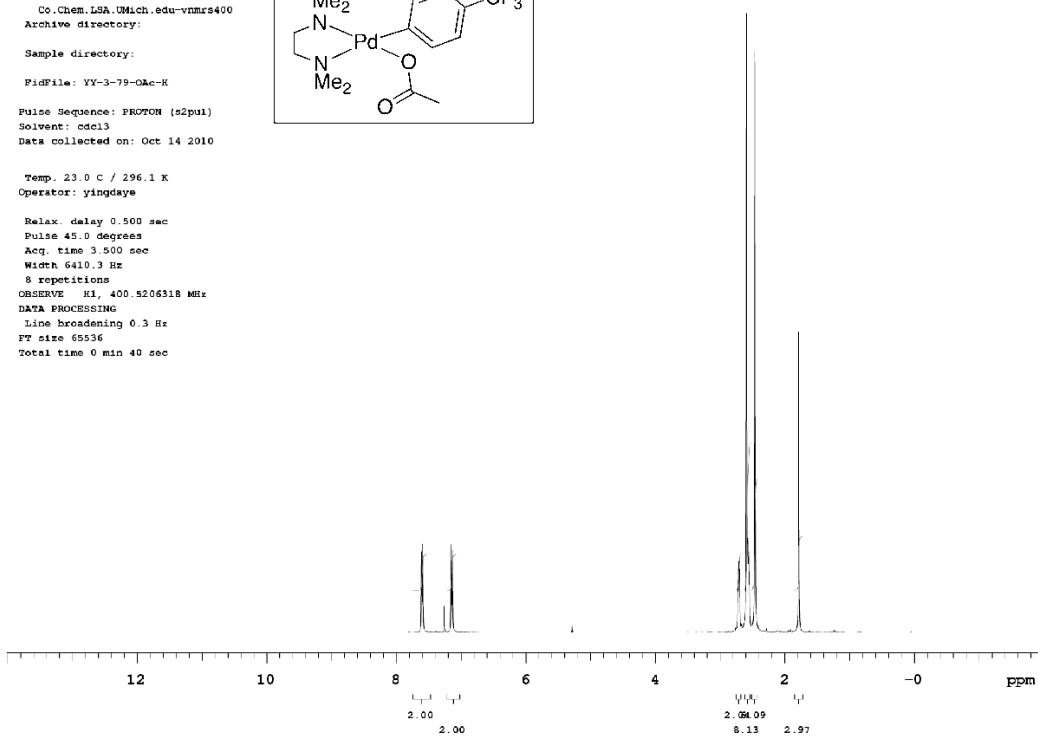

VARIAN

YV-3-79-OAc-F

Sample Name:

Data Collected on:  
Co.Chem.LSA.UMich.edu-vmms400  
Archive directory:

Sample directory:

FidFile: YV-3-79-OAc-F

Pulse Sequence: FLUORINE (s2pul)  
Solvent: cdcl3  
Data collected on: Oct 14 2010

Temp. 23.0 C / 296.1 K  
Operator: yingdaye

Relax. delay 1.000 sec  
Pulse 43.3 degrees  
Acq. time 0.754 sec  
Width 89295.7 Hz  
16 repetitions  
OBSERVE F19, 376.0659335 MHz  
DATA PROCESSING  
Line broadening 1.5 Hz  
FT size 131672  
Total time 0 min 31 sec

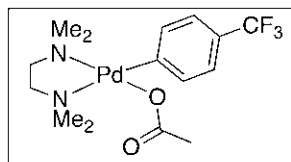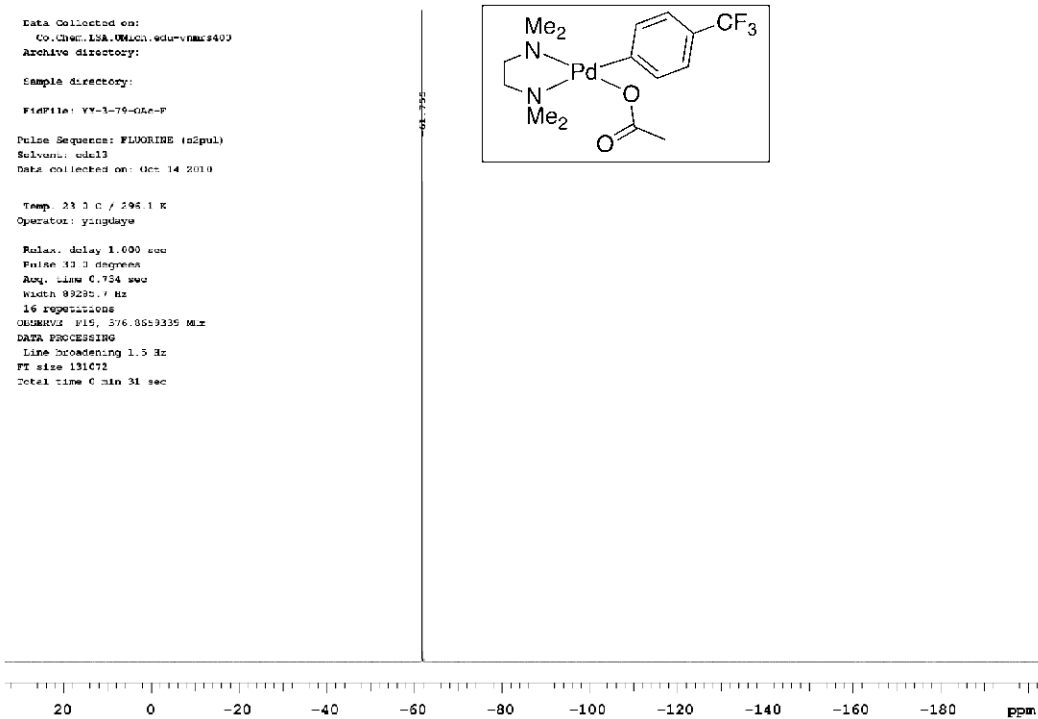

VARIAN

YY-3-79-OAc-C

Sample Name:

Data Collected on:  
Ga.Chem.LSA.UMich.edu-vnmrs400  
Archive directory:

Sample directory:

FidFile: YY-3-79-OAc-C

Pulse Sequence: CARBON (s2pul)  
Solvent: cdcl3  
Data collected on: Oct 15 2010

Operator: yingdaye

Relax. delay 0.100 sec  
Pulse 45.0 degrees  
Acq. time 2.569 sec  
Width 25510.2 Hz  
496 repetitions  
OBSERVE C13, 100.4641319 MHz  
DECOUPLE H1, 399.5409236 MHz  
Power 35 dB  
continuously on  
WALTZ-16 modulated  
DATA PROCESSING  
Line broadening 1.0 Hz  
FT size 131072  
Total time 22 min

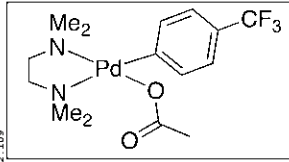

VARIAN

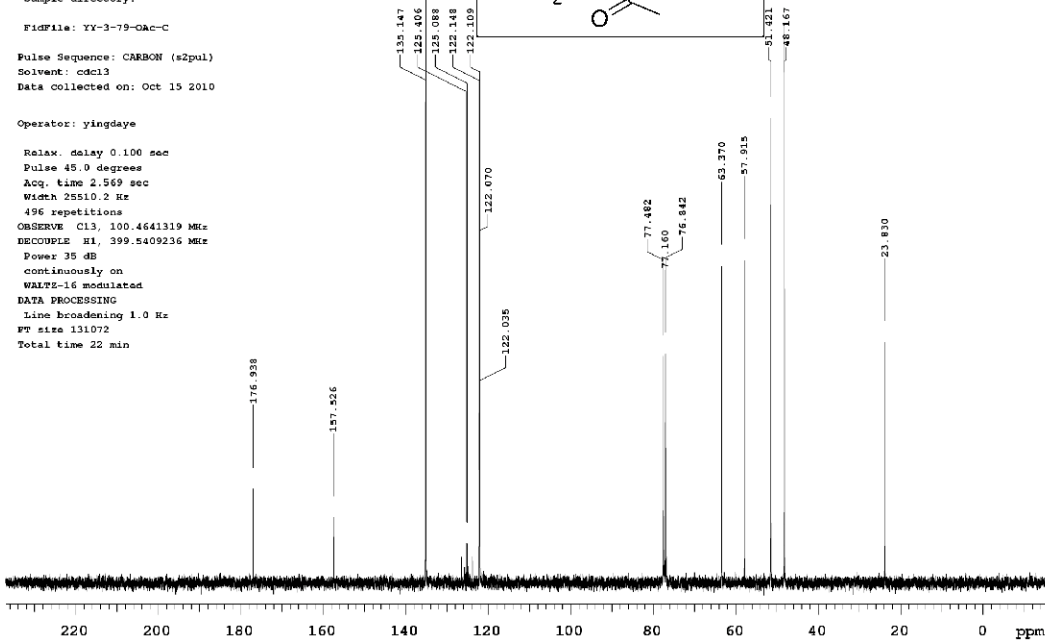

YY-3-79-OAc-C

Sample Name:

Data Collected on:  
Ga.Chem.LSA.UMich.edu-vnmrs400  
Archive directory:

Sample directory:

FidFile: YY-3-79-OAc-C

Pulse Sequence: CARBON (s2pul)  
Solvent: cdcl3  
Data collected on: Oct 15 2010

Operator: yingdaye

Relax. delay 0.100 sec  
Pulse 45.0 degrees  
Acq. time 2.569 sec  
Width 25510.2 Hz  
496 repetitions  
OBSERVE C13, 100.4641319 MHz  
DECOUPLE H1, 399.5409236 MHz  
Power 35 dB  
continuously on  
WALTZ-16 modulated  
DATA PROCESSING  
Line broadening 1.0 Hz  
FT size 131072  
Total time 22 min

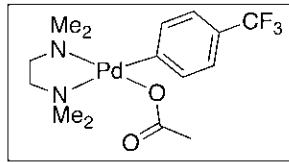

VARIAN

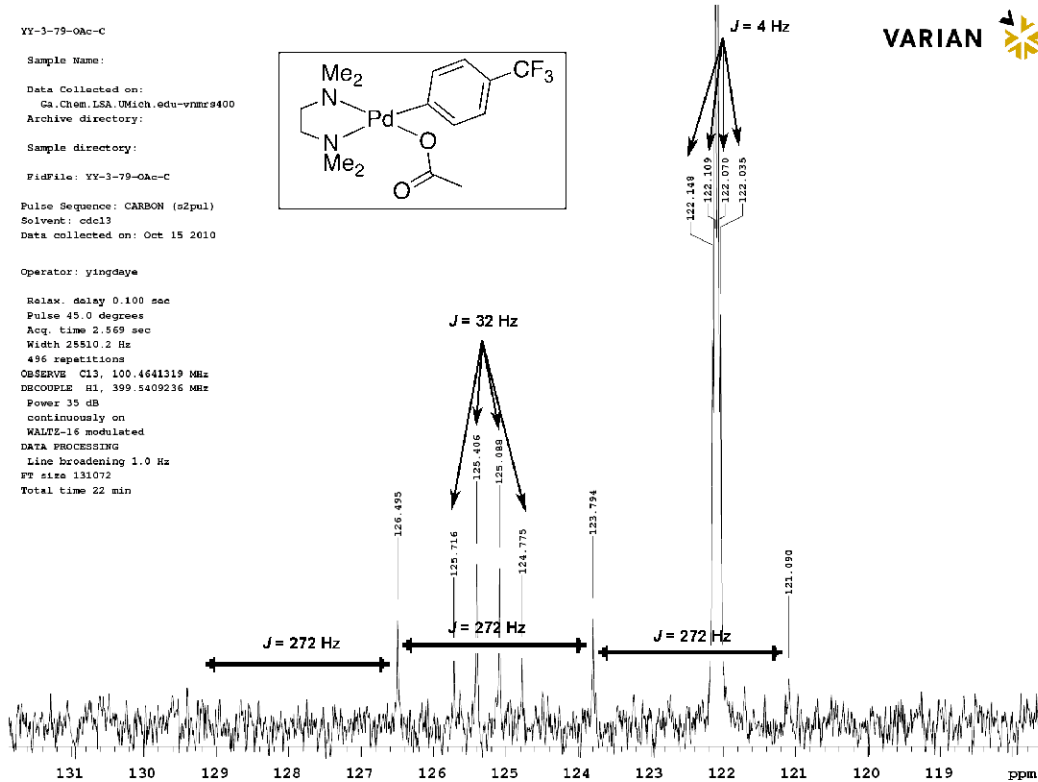

Supplement: NIHMS291039-supplement-2_si_002.pdf [file NIHMS291039-supplement-2_si_002.pdf]
